# Supplementary material for: A New Look at Physico-Chemical Causes of Changing Climate: Is Strong Acid Production Lowering the Surface pH Value a Main Cause for Increasing pCO2 in the Earth’s Atmosphere?
Source: Preprints.org preprint supplement (doi:10.20944/preprints202403.1601.v1), 2024-03-26
Supplement: Supplementary file 1 [file supplementary]

## Supplementary Materials

### **A new look at physico-chemical causes of changing climate: Is strong acid production lowering the surface pH value the real cause of increasing $p\text{CO}_2$ in the Earth's atmosphere?**

Ivan R. Kennedy<sup>1,2</sup>, Angus N. Crossan<sup>2</sup>, Migdat Hodzic<sup>3</sup> and Raymond Ritchie<sup>4</sup>

<sup>1</sup>School of Life and Environmental Sciences,

<sup>2</sup>Quick Test Technologies, c/- Sydney Institute of Agriculture  
University of Sydney NSW 2006 Australia

<sup>3</sup>Faculty of Information Technologies, The Dzemal Bijedic University of Mostar  
Bosnia and Herzegovina 88000

<sup>4</sup>Prince of Songkla University, Phuket, Thailand

Table S1, Data using CO2TIT1/Cal program for titration of seawater with strong acid and  $\text{CO}_2$  at 278.15, 288.15 and 298.15 K.

Table S2 CO2TIT3/Cal program Titrate, I iterations, U -meq acid, A=alkalinity, T=meq alkalinity, P=pH value, K=temperature Kelvin, S=35 ‰;

Table S3. Program Code for CO2TIT1/Cal

Table S4 Program Code for CO2TIT3.

Table S5 Program Code for CO2TIT4

Table S6 Emerson (2012) inorganic carbon chemistry equations

Table S6

Chemical Oceanography and Marine Carbon Cycle

Steven Emerson

- **Publisher:** Cambridge University Press
- **Online publication date:** September 2012
- **Print publication year:** 2008
- **Online ISBN:** 9780511793202
- **DOI:** <https://doi.org/10.1017/CBO9780511793202>

Carbonate Chemistry

Emerson S. and Hedges pp. 101-133

Appendix 4.2 equations were employed in CO<sub>2</sub>TIT1, CO<sub>2</sub>TIT3, CO<sub>2</sub>Tit4 to establish various constants for different temperature and salt concentrations.

**TABLE S1: CO2TIT1 Astrocal Titration with strong acid and CO<sub>2</sub> at 278, 288 and 298 K**

| δmeq strong ac I=10,M=20,U=-66.5,A=2.17,P=8.15,K=278.15,S=35 |           |          |          |          |          |          |          |          |          |          |          |
|--------------------------------------------------------------|-----------|----------|----------|----------|----------|----------|----------|----------|----------|----------|----------|
| Years strong aci                                             | 0         | 10       | 20       | 30       | 40       | 50       | 60       | 70       | 80       | 90       | 100      |
| a                                                            | 14.802    | 15.844   | 16.887   | 17.93    | 18.972   | 20.015   | 21.057   | 22.1     | 23.143   | 24.185   | 25.228   |
| b                                                            | 1896.349  | 1858.072 | 1868.334 | 1773.018 | 1726.944 | 1678.879 | 1629.05  | 1577.648 | 1524.837 | 1470.759 | 1415.539 |
| c                                                            | 136.826   | 122.714  | 110.083  | 98.741   | 88.528   | 79.31    | 70.975   | 63.426   | 56.582   | 50.37    | 44.731   |
| C                                                            | 2047.976  | 1996.63  | 1943.804 | 1889.688 | 1834.444 | 1778.204 | 1721.082 | 1663.174 | 1604.561 | 1545.315 | 1485.497 |
| Ac                                                           | 2170      | 21035    | 2037     | 1970.5   | 1904     | 18375    | 1771     | 1704.5   | 1638     | 1580.376 | 1505     |
| Ab                                                           | 2239.945  | 2173.445 | 2106.945 | 2040.445 | 1973.945 | 1907.445 | 1840.945 | 1774.445 | 1707.945 | 1641.445 | 1574.945 |
| Ksp                                                          | 4.31E-07  | 4.31E-07 | 4.31E-07 | 4.31E-07 | 4.31E-07 | 4.31E-07 | 4.31E-07 | 4.31E-07 | 4.31E-07 | 4.31E-07 | 4.31E-07 |
| K [Ca <sup>2+</sup> ][CO <sub>3</sub> <sup>2-</sup> ]        | 2.71E-07  | 2.43E-07 | 2.18E-07 | 1.96E-07 | 1.75E-07 | 1.57E-07 | 1.41E-07 | 1.26E-07 | 1.12E-07 | 9.97E-08 | 8.86E-08 |
| Ω                                                            | 0.6287127 | 0.56387  | 0.505832 | 0.453715 | 0.406786 | 0.36443  | 0.32613  | 0.291443 | 0.259992 | 0.231451 | 0.205537 |
| pH                                                           | 8.15      | 8.1158   | 8.07416  | 8.03754  | 8.00155  | 7.96606  | 7.93092  | 7.896    | 7.8612   | 7.8264   | 7.7914   |
| Temperature K                                                | 278.15    | 278.15   | 278.15   | 278.15   | 278.15   | 278.15   | 278.15   | 278.15   | 278.15   | 278.15   | 278.15   |
| Total pCO <sub>2</sub> ppm                                   | 283.9     | 303.9    | 323.9    | 343.9    | 363.9    | 383.9    | 403.9    | 423.9    | 443.9    | 463.9    | 483.9    |
| I=10,M=20,U=-66.5,A=2.17,P=8.15,K=288.15,S=35                |           |          |          |          |          |          |          |          |          |          |          |
| Years strong aci                                             | 0         | 10       | 20       | 30       | 40       | 50       | 60       | 70       | 80       | 90       | 100      |
| a                                                            | 10.767    | 11.516   | 12.265   | 13.014   | 13.763   | 14.513   | 15.262   | 16.011   | 16.76    | 17.509   | 18.259   |
| b                                                            | 1785.386  | 1755.748 | 1722.675 | 1686.56  | 1647.734 | 1606.481 | 1563.041 | 1517.624 | 1470.313 | 1421.457 | 1371.783 |
| c                                                            | 192.307   | 173.876  | 157.163  | 141.97   | 128.129  | 115.51   | 103.98   | 93.438   | 83.794   | 74.968   | 66.89    |
| C                                                            | 1988.46   | 1941.14  | 1892.102 | 1841.544 | 1789.626 | 1736.503 | 1682.282 | 1627.073 | 1570.966 | 1514.404 | 1456.369 |
| Ac                                                           | 2170      | 2103.5   | 2037     | 1970.5   | 1904     | 1837.5   | 1771     | 1704.5   | 1638     | 1571.5   | 1505     |
| Ab                                                           | 2258.78   | 2,192    | 2125.781 | 2059.281 | 1992.781 | 1926.281 | 1859.781 | 1793.281 | 1726.781 | 1660.281 | 1593.781 |
| Ksp                                                          | 4.35E-07  | 4.35E-07 | 4.35E-07 | 4.35E-07 | 4.35E-07 | 4.35E-07 | 4.35E-07 | 4.35E-07 | 4.35E-07 | 4.35E-07 | 4.35E-07 |
| K [Ca <sup>2+</sup> ][CO <sub>3</sub> <sup>2-</sup> ]        | 3.81E-07  | 3.44E-07 | 3.11E-07 | 2.81E-07 | 2.54E-07 | 2.29E-07 | 2.06E+00 | 1.85E-07 | 1.66E-07 | 1.48E-07 | 1.32E-07 |
| Ω                                                            | 0.8824661 | 0.79789  | 0.721195 | 0.651479 | 0.587982 | 0.530056 | 0.477146 | 0.428772 | 0.384518 | 0.344016 | 0.306948 |
| pH                                                           | 8.15      | 8.11351  | 8.077884 | 8.04293  | 8.00851  | 7.97448  | 7.94071  | 7.9071   | 7.87351  | 7.839847 | 7.80599  |
| Temperature K                                                | 288.15    | 288.15   | 288.15   | 288.15   | 288.15   | 288.15   | 288.15   | 288.15   | 288.15   | 288.15   | 288.15   |
| Total pCO <sub>2</sub> ppm                                   | 287.4     | 307.4    | 327.4    | 347.4    | 367.4    | 387.4    | 407.4    | 427.4    | 447.4    | 467.4    | 487.4    |
| I=10,M=20,U=-66.5,A=2.17,P=8.15,K=298.15,S=35                |           |          |          |          |          |          |          |          |          |          |          |
| Years strong aci                                             | 0         | 10       | 20       | 30       | 40       | 50       | 60       | 70       | 80       | 90       | 100      |
| a                                                            | 8.043     | 8.611    | 9.178    | 9.746    | 10.314   | 10.819   | 11.45    | 12.018   | 12.585   | 13.153   | 13.721   |
| b                                                            | 1652.623  | 1632.145 | 1607.864 | 1580.169 | 1549.388 | 1515.805 | 1479.665 | 1441.118 | 1400.542 | 1357.914 | 1313.444 |
| c                                                            | 258.688   | 235.678  | 214.568  | 195.165  | 177.306  | 160.847  | 145.668  | 131.66   | 118.729  | 106.793  | 95.778   |
| C                                                            | 1919.354  | 1910.744 | 1831.61  | 1785.08  | 1737.008 | 1687.534 | 1636.782 | 1584.858 | 1531.856 | 1477.86  | 1422.943 |
| Ac                                                           | 2170      | 2103.5   | 2037     | 1970.5   | 1904     | 1837.5   | 1771     | 1704.5   | 1638     | 1571.5   | 1505     |
| Ab                                                           | 2279.415  | 2277.727 | 2243.482 | 2209.867 | 2176.73  | 2143.938 | 2111.367 | 2078.901 | 2046.428 | 2,014    | 1981.022 |
| Ksp                                                          | 4.27E-07  | 4.27E-07 | 4.27E-07 | 4.27E-07 | 4.27E-07 | 4.27E-07 | 4.27E-07 | 4.27E-07 | 4.27E-07 | 4.27E-07 | 4.27E-07 |
| K [Ca <sup>2+</sup> ][CO <sub>3</sub> <sup>2-</sup> ]        | 5.12E-07  | 4.67E-07 | 4.25E-07 | 3.86E-07 | 3.51E-07 | 3.18E-07 | 2.88E-07 | 2.61E-07 | 2.35E-07 | 2.11E-07 | 1.90E-07 |
| Ω                                                            | 1.198879  | 1.092237 | 0.994404 | 0.904484 | 0.821715 | 0.74544  | 0.67509  | 0.61017  | 0.550244 | 0.494928 | 0.443879 |
| pH                                                           | 8.15      | 8.11495  | 8.08071  | 8.0471   | 8.01396  | 7.98117  | 7.94859  | 7.91613  | 7.88366  | 7.85107  | 7.818252 |
| Temperature K                                                | 298.15    | 298.15   | 298.15   | 298.15   | 298.15   | 298.15   | 298.15   | 298.15   | 298.15   | 298.15   | 298.15   |
| Total pCO <sub>2</sub> ppm                                   | 283.28    | 303.28   | 323.28   | 343.28   | 363.28   | 383.28   | 403.28   | 423.28   | 443.28   | 463.276  | 483.276  |
| I=10,M=20,A=2.17,P=8.15,K=278.15,S=35                        |           |          |          |          |          |          |          |          |          |          |          |
| Years CO <sub>2</sub>                                        | 0         | 10       | 20       | 30       | 40       | 50       | 60       | 70       | 80       | 90       | 100      |
| a                                                            | 14.802    | 15.844   | 16.887   | 17.93    | 18.97    | 20.014   | 21.057   | 22.1     | 23.143   | 24.185   | 25.228   |
| b                                                            | 1896.349  | 1910.52  | 1923.279 | 1934.827 | 1945.332 | 1954.929 | 1963.732 | 1971.837 | 1979.325 | 1986.264 | 1992.711 |
| c                                                            | 136.826   | 129.74   | 123.36   | 112.334  | 107.537  | 103.134  | 99.081   | 95.337   | 91.868   | 88.644   | 85.644   |
| C                                                            | 2047.977  | 2056.493 | 2063.526 | 2070.343 | 2076.638 | 2082.479 | 2087.923 | 2093.019 | 2097.805 | 2102.317 | 2106.584 |
| Ac                                                           | 2170      | 2170     | 2170     | 2170     | 2170     | 2170     | 2170     | 2170     | 2170     | 2170     | 2170     |
| Ab                                                           | 2239.945  | 2239.945 | 2239.945 | 2239.945 | 2239.945 | 2239.945 | 2239.945 | 2239.945 | 2239.945 | 2239.945 | 2239.945 |
| Ksp                                                          | 4.31E-07  | 4.31E-07 | 4.31E-07 | 4.31E-07 | 4.31E-07 | 4.31E-07 | 4.31E-07 | 4.31E-07 | 4.31E-07 | 4.31E-07 | 4.31E-07 |
| K [Ca <sup>2+</sup> ][CO <sub>3</sub> <sup>2-</sup> ]        | 2.71E-07  | 2.57E-07 | 2.44E-07 | 2.33E-07 | 2.22E-07 | 2.13E-07 | 2.04E-07 | 1.96E-07 | 1.89E-07 | 1.82E-07 | 1.76E-07 |
| Ω                                                            | 0.6287127 | 0.596152 | 0.56684  | 0.540309 | 0.516175 | 0.494126 | 0.4739   | 0.455277 | 0.438074 | 0.422133 | 0.407319 |
| pH                                                           | 8.15      | 8.12367  | 8.09888  | 8.07547  | 8.05327  | 8.03217  | 8.01207  | 7.992871 | 7.97745  | 7.95687  | 7.93996  |
| Temperature K                                                | 278.15    | 278.15   | 278.15   | 278.15   | 278.15   | 278.15   | 278.15   | 278.15   | 278.15   | 278.15   | 278.15   |
| Total pCO <sub>2</sub> ppm                                   | 283.392   | 303.932  | 323.932  | 343.932  | 363.931  | 383.932  | 403.932  | 423.932  | 443.932  | 463.932  | 483.932  |
| I=10,M=20,A=2.17,P=8.15,K=288.15,S=35                        |           |          |          |          |          |          |          |          |          |          |          |
| Years CO <sub>2</sub>                                        | 0         | 10       | 20       | 30       | 40       | 50       | 60       | 70       | 80       | 90       | 100      |
| a                                                            | 10.767    | 11.516   | 12.265   | 13.013   | 13.763   | 14.513   | 15.262   | 16.011   | 16.76    | 17.509   | 18.259   |
| b                                                            | 1785.386  | 1803.197 | 1819.39  | 1834.179 | 1847.745 | 1860.235 | 1871.775 | 1882.471 | 1892.414 | 1901.682 | 1910.343 |
| c                                                            | 192.307   | 183.401  | 175.305  | 167.91   | 161.128  | 154.883  | 149.113  | 143.765  | 138.793  | 134.159  | 129.828  |
| C                                                            | 1988.46   | 1998.115 | 2006.96  | 2015.104 | 2022.636 | 2029.63  | 2036.149 | 2042.247 | 2047.967 | 2053.351 | 2058.43  |
| Ac                                                           | 2170      | 2170     | 2170     | 2170     | 2170     | 2170     | 2170     | 2170     | 2170     | 2170     | 2170     |
| Ab                                                           | 2258.8    | 2258.781 | 2258.781 | 2258.781 | 2258.781 | 2258.781 | 2258.781 | 2258.781 | 2258.781 | 2258.781 | 2258.781 |
| Ksp                                                          | 4.31E-07  | 4.31E-07 | 4.31E-07 | 4.31E-07 | 4.31E-07 | 4.31E-07 | 4.31E-07 | 4.31E-07 | 4.31E-07 | 4.31E-07 | 4.31E-07 |
| K [Ca <sup>2+</sup> ][CO <sub>3</sub> <sup>2-</sup> ]        | 3.81E-07  | 3.63E-07 | 3.47E-07 | 3.32E-07 | 3.19E-07 | 3.07E-07 | 2.95E-07 | 2.85E-07 | 2.75E-07 | 2.66E-07 | 2.57E-07 |
| Ω                                                            | 0.8824661 | 0.8416   | 0.804448 | 0.770514 | 0.73939  | 0.710732 | 0.684255 | 0.659713 | 0.6369   | 0.615634 | 0.59576  |
| pH                                                           | 8.15      | 8.1251   | 8.10161  | 8.07937  | 8.05827  | 8.03817  | 8.0189   | 8.00066  | 7.98309  | 7.96622  | 7.95     |
| Temperature K                                                | 288.15    | 288.15   | 288.15   | 288.15   | 288.15   | 288.15   | 288.15   | 288.15   | 288.15   | 288.15   | 288.15   |
| Total pCO <sub>2</sub> ppm                                   | 287.425   | 307.425  | 327.425  | 347.425  | 367.425  | 387.425  | 407.425  | 427.425  | 447.425  | 467.425  | 487.425  |
| I=10,M=20A=2.17,P=8.15,K=298.15,S=35                         |           |          |          |          |          |          |          |          |          |          |          |
| Years CO <sub>2</sub>                                        | 0         | 10       | 20       | 30       | 40       | 50       | 60       | 70       | 80       | 90       | 100      |
| a                                                            | 8.043     | 8.611    | 9.178    | 9.746    | 10.314   | 10.882   | 11.45    | 12.018   | 12.585   | 13.153   | 13.721   |
| b                                                            | 1652.623  | 1674.1   | 1693.779 | 1717.885 | 1728.607 | 1744.105 | 1758.512 | 1771.943 | 1784.498 | 1796.261 | 1807.308 |
| c                                                            | 258.688   | 247.95   | 238.111  | 229.058  | 220.696  | 212.948  | 205.744  | 199.028  | 192.751  | 186.869  | 181.346  |
| C                                                            | 1919.354  | 1930.661 | 1941.068 | 1950.689 | 1959.618 | 1967.934 | 1975.706 | 1982.989 | 1989.834 | 1996.284 | 2002.375 |
| Ac                                                           | 2170      | 2170     | 2170     | 2170     | 2170     | 2170     | 2170     | 2170     | 2170     | 2170     | 2170     |
| Ab                                                           | 2279.415  | 2279.416 | 2279.416 | 2279.416 | 2279.416 | 2279.416 | 2279.416 | 2279.416 | 2279.416 | 2279.416 | 2279.416 |
| Ksp                                                          | 4.27E-07  | 4.27E-07 | 4.27E-07 | 4.27E-07 | 4.27E-07 | 4.27E-07 | 4.27E-07 | 4.27E-07 | 4.27E-07 | 4.27E-07 | 4.27E-07 |
| K [Ca <sup>2+</sup> ][CO <sub>3</sub> <sup>2-</sup> ]        | 5.12E-07  | 4.91E-07 | 4.71E-07 | 4.54E-07 | 4.37E-07 | 4.22E-07 | 4.07E-07 | 3.94E-07 | 3.82E-07 | 3.70E-07 | 3.59E-07 |
| Ω                                                            | 1.198879  | 1.149112 | 1.103512 | 1.061556 | 1.022806 | 0.986895 | 0.953511 | 0.922387 | 0.893295 | 0.866037 | 0.84044  |
| pH                                                           | 8.15      | 8.12598  | 8.10332  | 8.08187  | 8.0615   | 8.0421   | 8.02357  | 8.00586  | 7.98888  | 7.97257  | 7.95687  |
| Temperature K                                                | 298.15    | 298.15   | 298.15   | 298.15   | 298.15   | 298.15   | 298.15   | 298.15   | 298.15   | 298.15   | 298.15   |
| Total pCO <sub>2</sub> ppm                                   | 283.276   | 303.276  | 323.276  | 343.276  | 363.276  | 383.276  | 403.276  | 423.276  | 443.276  | 463.276  | 483.276  |

**Table S1** **Table 3a** Effect of seawater temperature on long term titration with strong acid

| Years                                                             | 0         | 10        | 20        | 30        | 40        | 50        | 60        | 70        | 80                              | 90        | 100       |
|-------------------------------------------------------------------|-----------|-----------|-----------|-----------|-----------|-----------|-----------|-----------|---------------------------------|-----------|-----------|
| Initial pH 8.15, T=278.15, Ac=2.17, S=35, +0.0665 mequiv/kg acid  |           |           |           |           |           |           |           |           |                                 |           |           |
| K [Ca <sup>2+</sup> ][CO <sub>3</sub> <sup>2-</sup> ]             | 2.71E-07  | 2.43E-07  | 2.18E-07  | 1.96E-07  | 1.75E-07  | 1.57E-07  | 1.41E-07  | 1.26E-07  | 1.12E-07                        | 9.97E-08  | 8.86E-08  |
| Ω                                                                 | 0.6287127 | 0.5638697 | 0.5058321 | 0.4537154 | 0.4067861 | 0.3644304 | 0.3261298 | 0.2914431 | 0.2599921                       | 0.231451  | 0.2055366 |
| pCO <sub>2</sub> ppm                                              | 283.9     | 303.9     | 323.9     | 343.9     | 363.9     | 383.9     | 403.9     | 423.9     | 443.9                           | 463.9     | 483.9     |
| pH                                                                | 8.15      | 8.11158   | 8.07416   | 8.03754   | 8.00155   | 7.96606   | 7.93092   | 7.896     | 7.8612                          | 7.8264    | 7.7914    |
| Initial pH 8.15, T=288.15, Ac=2.17, S=35, +0.0665 mequiv/kg acid  |           |           |           |           |           |           |           |           | $K_{sp} = 4.309 \times 10^{-7}$ |           |           |
| K [Ca <sup>2+</sup> ][CO <sub>3</sub> <sup>2-</sup> ]             | 3.81E-07  | 3.44E-07  | 3.11E-07  | 2.81E-07  | 2.54E-07  | 2.29E-07  | 2.06E+00  | 1.85E-07  | 1.66E-07                        | 1.48E-07  | 1.32E-07  |
| Ω                                                                 | 0.8824661 | 0.7978904 | 0.7211952 | 0.6514792 | 0.5879818 | 0.5300558 | 0.477146  | 0.4287723 | 0.3845175                       | 0.3440164 | 0.3069479 |
| pCO <sub>2</sub> ppm                                              | 287.4     | 307.4     | 327.4     | 347.4     | 367.4     | 387.4     | 407.4     | 427.4     | 447.4                           | 467.4     | 487.4     |
| pH                                                                | 8.15      | 8.11351   | 8.077838  | 8.04293   | 8.00851   | 7.97448   | 7.94071   | 7.9071    | 7.87351                         | 7.8398469 | 7.80599   |
| Initial pH 8.15, T=298.15, Ac=2.17, S=35, + 0.0665 mequiv/kg acid |           |           |           |           |           |           |           |           | $K_{sp} = 4.315 \times 10^{-7}$ |           |           |
| K [Ca <sup>2+</sup> ][CO <sub>3</sub> <sup>2-</sup> ]             | 5.12E-07  | 4.67E-07  | 4.25E-07  | 3.86E-07  | 3.51E-07  | 3.18E-07  | 2.88E-07  | 2.61E-07  | 2.35E-07                        | 2.11E-07  | 1.90E-07  |
| Ω                                                                 | 1.198879  | 1.0922366 | 0.9944039 | 0.9044844 | 0.8217151 | 0.7454395 | 0.67509   | 0.6101697 | 0.5502439                       | 0.4949277 | 0.4438793 |
| pCO <sub>2</sub> ppm                                              | 283.28    | 303.28    | 323.28    | 343.28    | 363.28    | 383.28    | 403.28    | 423.28    | 443.28                          | 463.276   | 483.276   |
| pH                                                                | 8.15      | 8.11495   | 8.08071   | 8.0471    | 8.01396   | 7.98117   | 7.94859   | 7.91613   | 7.88366                         | 7.85107   | 7.818252  |

**Table 3b** Effect of seawater temperature on long term titration with pCO<sub>2</sub>

| Years                                                            | 0         | 10        | 20        | 30        | 40        | 50        | 60        | 70        | 80                              | 90        | 100       |
|------------------------------------------------------------------|-----------|-----------|-----------|-----------|-----------|-----------|-----------|-----------|---------------------------------|-----------|-----------|
| Initial pH 8.15, T=278.15, Ac=2.17, S=35, +2 ppm CO <sub>2</sub> |           |           |           |           |           |           |           |           |                                 |           |           |
| K [Ca <sup>2+</sup> ][CO <sub>3</sub> <sup>2-</sup> ]            | 5.12E-07  | 4.67E-07  | 4.25E-07  | 3.86E-07  | 3.51E-07  | 3.18E-07  | 2.88E-07  | 2.61E-07  | 2.35E-07                        | 2.11E-07  | 1.90E-07  |
| Ω                                                                | 0.6287127 | 0.5961523 | 0.5668404 | 0.5403085 | 0.5161751 | 0.4941258 | 0.4738995 | 0.4552774 | 0.4380744                       | 0.4221332 | 0.4073189 |
| pCO <sub>2</sub> ppm                                             | 283.276   | 303.276   | 323.276   | 343.276   | 363.276   | 383.276   | 403.276   | 423.276   | 443.276                         | 463.276   | 483.276   |
| pH                                                               | 8.15      | 8.11495   | 8.08071   | 8.0471    | 8.01396   | 7.98117   | 7.94859   | 7.91613   | 7.88366                         | 7.85107   | 7.818252  |
| Initial pH 8.15, T=288.15, Ac=2.17, S=35                         |           |           |           |           |           |           |           |           | $K_{sp} = 4.309 \times 10^{-7}$ |           |           |
| K [Ca <sup>2+</sup> ][CO <sub>3</sub> <sup>2-</sup> ]            | 3.81E-07  | 3.63E-07  | 3.47E-07  | 3.32E-07  | 3.19E-07  | 3.07E-07  | 2.95E-07  | 2.85E-07  | 2.75E-07                        | 2.66E-07  | 2.57E-07  |
| Ω                                                                | 0.8824661 | 0.8415998 | 0.8044478 | 0.7705144 | 0.7393898 | 0.7107323 | 0.6842546 | 0.6597128 | 0.6369                          | 0.6156336 | 0.59576   |
| pCO <sub>2</sub> ppm                                             | 287.43    | 307.43    | 327.43    | 347.43    | 367.43    | 387.43    | 407.43    | 427.43    | 447.43                          | 467.43    | 487.43    |
| pH                                                               | 8.15      | 8.1251    | 8.10161   | 8.07937   | 8.05827   | 8.03817   | 8.0189    | 8.00066   | 7.98309                         | 7.96622   | 7.95      |
| Initial pH 8.15, T=298.15, Ac=2.17, S=35                         |           |           |           |           |           |           |           |           | $K_{sp} = 4.315 \times 10^{-7}$ |           |           |
| K [Ca <sup>2+</sup> ][CO <sub>3</sub> <sup>2-</sup> ]            | 5.12E-07  | 4.91E-07  | 4.71E-07  | 4.54E-07  | 4.37E-07  | 4.22E-07  | 4.07E-07  | 3.94E-07  | 3.82E-07                        | 3.70E-07  | 3.59E-07  |
| Ω                                                                | 1.198879  | 1.1491118 | 1.1035124 | 1.0615562 | 1.0228062 | 0.9868949 | 0.9535107 | 0.9223872 | 0.8932954                       | 0.866037  | 0.84044   |
| Total pCO <sub>2</sub> ppmv                                      | 283.276   | 303.276   | 323.276   | 343.276   | 363.276   | 383.276   | 403.276   | 423.276   | 443.276                         | 463.276   | 483.276   |
| pH                                                               | 8.15      | 8.12598   | 8.10332   | 8.08187   | 8.0615    | 8.0421    | 8.02357   | 8.00586   | 7.98888                         | 7.97257   | 7.956687  |

**Table S2: Astrocal Titrant showing outputs for inputs. CO2TIT3**

I=iterations,U=-meq acid, A=alkalinity, T= meq alkalinity, P=pH, K=temperature, S=35

| TITRATE                                                            | Run 7A | I=11,U=-0.0166,T=0.00001,A=2.32,P=8.18,K=293.15,S=35 |          |          |          |          |          |          |          |          |          | CO2TIT3  |          |    |    |    |    |    |    |    |    |    |     |     |
|--------------------------------------------------------------------|--------|------------------------------------------------------|----------|----------|----------|----------|----------|----------|----------|----------|----------|----------|----------|----|----|----|----|----|----|----|----|----|-----|-----|
| Years strong acid + CO2                                            |        |                                                      |          |          |          |          |          |          |          |          |          |          |          |    |    |    |    |    |    |    |    |    |     |     |
| a                                                                  |        | 9.123                                                | 9.447    | 9.822    | 10.193   | 10.568   | 10.945   | 11.324   | 11.705   | 12.088   | 12.473   | 12.861   | 13.249   |    |    |    |    |    |    |    |    |    |     |     |
| b                                                                  |        | 1813.696                                             | 1814.149 | 1815.455 | 1815.789 | 1815.405 | 1814.321 | 1812.577 | 1810.208 | 1807.247 | 1803.725 | 1799.967 | 1795.113 |    |    |    |    |    |    |    |    |    |     |     |
| c                                                                  |        | 253.152                                              | 244.59   | 235.602  | 227.1    | 218.957  | 211.164  | 203.701  | 196.551  | 189.696  | 183.122  | 176.814  | 170.758  |    |    |    |    |    |    |    |    |    |     |     |
| C                                                                  |        | 2075.971                                             | 2068.186 | 2060.879 | 2053.082 | 2044.93  | 2036.43  | 2027.602 | 2018.464 | 2009.031 | 1999.32  | 1989.642 | 1979.12  |    |    |    |    |    |    |    |    |    |     |     |
| Ac                                                                 |        | 2320                                                 | 2303.33  | 2286.66  | 2269.99  | 2253.32  | 2236.65  | 2219.98  | 2203.31  | 2186.64  | 2169.97  | 2153.3   | 2136.63  |    |    |    |    |    |    |    |    |    |     |     |
| Ab                                                                 |        | 2424.174                                             | 2404.822 | 2385.253 | 2365.831 | 2346.51  | 2327.288 | 2308.16  | 2289.121 | 2270.168 | 2251.296 | 2232.5   | 2213.779 |    |    |    |    |    |    |    |    |    |     |     |
| Ksp                                                                |        | 4.30E-07                                             | 4.30E-07 | 4.30E-07 | 4.30E-07 | 4.30E-07 | 4.30E-07 | 4.30E-07 | 4.30E-07 | 4.30E-07 | 4.30E-07 | 4.30E-07 | 4.30E-07 |    |    |    |    |    |    |    |    |    |     |     |
| K [Ca <sup>2+</sup> ][CO <sub>3</sub> <sup>2-</sup> ]              |        | 5.01E-07                                             | 4.84E-07 | 4.66E-07 | 4.50E-07 | 4.34E-07 | 4.18E-07 | 4.03E-07 | 3.89E-07 | 3.76E-07 | 3.63E-07 | 3.50E-07 | 3.38E-07 |    |    |    |    |    |    |    |    |    |     |     |
| Ω                                                                  |        | 1.165668                                             | 1.126244 | 1.084857 | 1.045709 | 1.008214 | 0.97233  | 0.937966 | 0.905041 | 0.873479 | 0.843208 | 0.814161 | 0.786276 |    |    |    |    |    |    |    |    |    |     |     |
| pH                                                                 |        | 8.18                                                 | 8.16495  | 8.14838  | 8.13233  | 8.116568 | 8.10109  | 8.08588  | 8.07093  | 8.05622  | 8.04175  | 8.027507 | 8.013473 |    |    |    |    |    |    |    |    |    |     |     |
| Temperature K                                                      |        | 293.15                                               | 293.15   | 293.15   | 293.15   | 293.15   | 293.15   | 293.15   | 293.15   | 293.15   | 293.15   | 293.15   | 293.15   |    |    |    |    |    |    |    |    |    |     |     |
| Total pCO2 ppmv                                                    |        | 281.508                                              | 291.508  | 303.065  | 314.527  | 326.086  | 337.716  | 349.416  | 361.182  | 373.01   | 384.896  | 396.838  | 408.833  |    |    |    |    |    |    |    |    |    |     |     |
| TITRATE Run 7B I=11,U=0.0333,T=0.00001,A=2.32,P=8.18,K=293.15,S=35 |        |                                                      |          |          |          |          |          |          |          |          |          |          | CO2TIT3  |    |    |    |    |    |    |    |    |    |     |     |
| Years strong acid + C                                              |        |                                                      |          |          |          |          |          |          |          |          |          |          | 0        | 10 | 20 | 30 | 40 | 50 | 60 | 70 | 80 | 90 | 100 | 110 |
| a                                                                  |        | 9.123                                                | 9.447    | 9.911    | 10.362   | 10.821   | 11.283   | 11.748   | 12.219   | 12.692   | 13.168   | 13.648   | 14.131   |    |    |    |    |    |    |    |    |    |     |     |
| b                                                                  |        | 1813.696                                             | 1803.334 | 1796.251 | 1787.257 | 1777.021 | 1765.56  | 1752.953 | 1739.266 | 1724.564 | 1708.905 | 1692.343 | 1674.932 |    |    |    |    |    |    |    |    |    |     |     |
| c                                                                  |        | 253.152                                              | 241.683  | 228.574  | 216.421  | 204.89   | 193.97   | 183.624  | 173.817  | 164.518  | 155.698  | 147.328  | 139.384  |    |    |    |    |    |    |    |    |    |     |     |
| C                                                                  |        | 2075.971                                             | 2054.464 | 2034.736 | 2014.04  | 1992.732 | 1970.813 | 1948.325 | 1925.302 | 1901.774 | 1877.771 | 1853.319 | 1828.447 |    |    |    |    |    |    |    |    |    |     |     |
| Ac                                                                 |        | 2.32                                                 | 2286.7   | 2253.4   | 2220.1   | 2186.8   | 2153.5   | 2120.2   | 2089.9   | 2053.6   | 2020.3   | 1987     | 1953.7   |    |    |    |    |    |    |    |    |    |     |     |
| Ab                                                                 |        | 2424.174                                             | 2387.734 | 2350.522 | 2313.578 | 2276.774 | 2240.115 | 2203.592 | 2167.199 | 2130.93  | 2094.777 | 2058.734 | 2022.8   |    |    |    |    |    |    |    |    |    |     |     |
| Ksp                                                                |        | 4.30E-07                                             | 4.30E-07 | 4.30E-07 | 4.30E-07 | 4.30E-07 | 4.30E-07 | 4.30E-07 | 4.30E-07 | 4.30E-07 | 4.30E-07 | 4.30E-07 | 4.30E-07 |    |    |    |    |    |    |    |    |    |     |     |
| K [Ca <sup>2+</sup> ][CO <sub>3</sub> <sup>2-</sup> ]              |        | 5.01E-07                                             | 4.79E-07 | 4.53E-07 | 4.29E-07 | 4.06E-07 | 3.84E-07 | 3.64E-07 | 3.44E-07 | 3.26E-07 | 3.08E-07 | 2.92E-07 | 2.76E-07 |    |    |    |    |    |    |    |    |    |     |     |
| Ω                                                                  |        | 1.165668                                             | 1.112856 | 1.052496 | 0.996538 | 0.943438 | 0.893157 | 0.845516 | 0.800359 | 0.755419 | 7.17E-01 | 0.678389 | 0.64181  |    |    |    |    |    |    |    |    |    |     |     |
| pH                                                                 |        | 8.18                                                 | 8.16235  | 8.13984  | 8.11883  | 8.09701  | 8.07604  | 8.05534  | 8.03491  | 8.014717 | 7.99E+00 | 7.975    | 7.97554  |    |    |    |    |    |    |    |    |    |     |     |
| Temperature K                                                      |        | 293.15                                               | 293.15   | 293.15   | 293.15   | 293.15   | 293.15   | 293.15   | 293.15   | 293.15   | 293.15   | 293.15   | 293.15   |    |    |    |    |    |    |    |    |    |     |     |
| Total pCO2 ppmv                                                    |        | 281.508                                              | 291.508  | 305.809  | 319.755  | 333.894  | 348.156  | 362.54   | 377.037  | 391.642  | 4.06E+02 | 421.148  | 436.038  |    |    |    |    |    |    |    |    |    |     |     |
| TITRATE 7C I=11,U=0.0666,T=0.00001,A=2.32,P=8.18,K=293.15,S=35     |        |                                                      |          |          |          |          |          |          |          |          |          |          | CO2TIT3  |    |    |    |    |    |    |    |    |    |     |     |
| Years strong acid + C                                              |        |                                                      |          |          |          |          |          |          |          |          |          |          | 0        | 10 | 20 | 30 | 40 | 50 | 60 | 70 | 80 | 90 | 100 | 110 |
| a                                                                  |        | 9.123                                                | 9.447    | 10.089   | 10.704   | 11.333   | 11.971   | 12.617   | 13.271   | 13.934   | 14.602   | 15.277   | 15.957   |    |    |    |    |    |    |    |    |    |     |     |
| b                                                                  |        | 1813.696                                             | 1781.61  | 1757.096 | 1728.34  | 1696.855 | 1662.716 | 1626.123 | 1772.607 | 1719.862 | 1666.057 | 1458.48  | 1411.969 |    |    |    |    |    |    |    |    |    |     |     |
| c                                                                  |        | 253.152                                              | 235.895  | 214.852  | 195.93   | 178.373  | 162.142  | 147.138  | 133.276  | 120.474  | 108.658  | 97.76    | 87.716   |    |    |    |    |    |    |    |    |    |     |     |
| C                                                                  |        | 2075.971                                             | 2026.952 | 1982.037 | 1934.974 | 1886.561 | 1836.829 | 1785.878 | 1919.154 | 1854.27  | 1789.317 | 1571.517 | 1515.642 |    |    |    |    |    |    |    |    |    |     |     |
| Ac                                                                 |        | 2320                                                 | 2253.4   | 2186.8   | 2120.2   | 2053.6   | 1987     | 1920.4   | 1853.8   | 1787.2   | 1720.6   | 1654     | 1587.4   |    |    |    |    |    |    |    |    |    |     |     |
| Ab                                                                 |        | 2424.174                                             | 2353.51  | 2280.986 | 2208.985 | 2137.227 | 2065.723 | 1994.456 | 1923.415 | 1852.585 | 1781.955 | 1711.513 | 1641.249 |    |    |    |    |    |    |    |    |    |     |     |
| Ksp                                                                |        | 4.30E-07                                             | 4.30E-07 | 4.30E-07 | 4.30E-07 | 4.30E-07 | 4.30E-07 | 4.30E-07 | 4.30E-07 | 4.30E-07 | 4.30E-07 | 4.30E-07 | 4.30E-07 |    |    |    |    |    |    |    |    |    |     |     |
| K [Ca <sup>2+</sup> ][CO <sub>3</sub> <sup>2-</sup> ]              |        | 5.01E-07                                             | 4.67E-07 | 4.25E-07 | 3.88E-07 | 3.53E-07 | 3.21E-07 | 2.91E-07 | 2.64E-07 | 2.39E-07 | 2.15E-07 | 1.94E-07 | 1.74E-07 |    |    |    |    |    |    |    |    |    |     |     |
| Ω                                                                  |        | 1.165668                                             | 1.086205 | 0.98931  | 0.902181 | 0.821337 | 0.7466   | 0.677515 | 0.613684 | 0.554736 | 0.50033  | 0.450147 | 0.403897 |    |    |    |    |    |    |    |    |    |     |     |
| pH                                                                 |        | 8.18                                                 | 8.15709  | 8.12252  | 8.08965  | 8.05687  | 8.02426  | 7.991755 | 7.95929  | 7.9268   | 7.8942   | 7.86144  | 7.828435 |    |    |    |    |    |    |    |    |    |     |     |
| Temperature K                                                      |        | 293.15                                               | 293.15   | 293.15   | 293.15   | 293.15   | 293.15   | 293.15   | 293.15   | 293.15   | 293.15   | 293.15   | 293.15   |    |    |    |    |    |    |    |    |    |     |     |
| Total pCO2 ppmv                                                    |        | 281.508                                              | 291.508  | 311.312  | 330.295  | 349.708  | 369.39   | 389.337  | 409.527  | 429.432  | 450.571  | 471.394  | 492.399  |    |    |    |    |    |    |    |    |    |     |     |
| TITRATE 7D I=11,T=0.000005,A=2.32,P=8.18,K=293.15,S=35             |        |                                                      |          |          |          |          |          |          |          |          |          |          | CO2TIT3  |    |    |    |    |    |    |    |    |    |     |     |
| Years CO2                                                          |        |                                                      |          |          |          |          |          |          |          |          |          |          | 0        | 10 | 20 | 30 | 40 | 50 | 60 | 70 | 80 | 90 | 100 | 110 |
| a                                                                  |        | 9.123                                                | 9.285    | 9.428    | 9.572    | 9.718    | 9.863    | 10.009   | 10.155   | 10.302   | 10.448   | 10.595   | 10.742   |    |    |    |    |    |    |    |    |    |     |     |
| b                                                                  |        | 1813.696                                             | 1819.398 | 1824.303 | 1829.199 | 1833.995 | 1838.705 | 1843.329 | 1847.869 | 1852.328 | 1856.709 | 1861.012 | 1865.239 |    |    |    |    |    |    |    |    |    |     |     |
| c                                                                  |        | 253.152                                              | 250.301  | 247.848  | 245.4    | 243.002  | 240.648  | 238.336  | 236.065  | 233.836  | 231.646  | 229.494  | 227.38   |    |    |    |    |    |    |    |    |    |     |     |
| C                                                                  |        | 2075.971                                             | 2078.984 | 2081.579 | 2084.171 | 2086.715 | 2089.216 | 2091.674 | 2094.089 | 2096.466 | 2098.803 | 2101.101 | 2103.361 |    |    |    |    |    |    |    |    |    |     |     |
| Ac                                                                 |        | 2320                                                 | 2320     | 2320     | 2320     | 2320     | 2320     | 2320     | 2320     | 2320     | 2320     | 2320     | 2320     |    |    |    |    |    |    |    |    |    |     |     |
| Ab                                                                 |        | 2424.174                                             | 2423.049 | 2422.08  | 2421.112 | 2420.164 | 2419.231 | 24183.15 | 2417.414 | 2416.529 | 2415.659 | 2414.804 | 2413.396 |    |    |    |    |    |    |    |    |    |     |     |
| Ksp                                                                |        | 4.30E-07                                             | 4.30E-07 | 4.30E-07 | 4.30E-07 | 4.30E-07 | 4.30E-07 | 4.30E-07 | 4.30E-07 | 4.30E-07 | 4.30E-07 | 4.30E-07 | 4.30E-07 |    |    |    |    |    |    |    |    |    |     |     |
| K [Ca <sup>2+</sup> ][CO <sub>3</sub> <sup>2-</sup> ]              |        | 5.01E-07                                             | 4.96E-07 | 4.91E-07 | 4.86E-07 | 4.81E-07 | 4.76E+00 | 4.72E-07 | 4.67E-07 | 4.62E+00 | 4.59E-07 | 4.54E-07 | 4.50E-07 |    |    |    |    |    |    |    |    |    |     |     |
| Ω                                                                  |        | 1.165668                                             | 1.152539 | 1.141246 | 1.129974 | 1.108089 | 1.108089 | 1.097444 | 1.08699  | 1.076723 | 1.066639 | 1.056732 | 1.046999 |    |    |    |    |    |    |    |    |    |     |     |
| pH                                                                 |        | 8.17372                                              | 8.17372  | 8.16827  | 8.1628   | 8.15739  | 8.15205  | 8.14677  | 8.14154  | 8.13638  | 8.13126  | 8.12621  | 8.1212   |    |    |    |    |    |    |    |    |    |     |     |
| Temperature K                                                      |        | 293.15                                               | 293.15   | 293.15   | 293.15   | 293.15   | 293.15   | 293.15   | 293.15   | 293.15   | 293.15   | 293.15   | 293.15   |    |    |    |    |    |    |    |    |    |     |     |
| Total pCO2 ppmv                                                    |        | 281.508                                              | 286.508  | 290.906  | 295.387  | 299.868  | 304.359  | 308.859  | 313.368  | 317.884  | 322.409  | 326.942  | 331.482  |    |    |    |    |    |    |    |    |    |     |     |

| TITRATE 7E                                            |          | I=11,T=0.00001,A=2.32,P=8.18,K=293.15,S=35                    |          |          |          |          |          |          |          |          |          | CO2TIT3   |  |
|-------------------------------------------------------|----------|---------------------------------------------------------------|----------|----------|----------|----------|----------|----------|----------|----------|----------|-----------|--|
| Years CO2                                             | 0        | 10                                                            | 20       | 30       | 40       | 50       | 60       | 70       | 80       | 90       | 100      | 110       |  |
| a                                                     | 9.123    | 9.447                                                         | 9.732    | 10.024   | 19.316   | 10.609   | 10.903   | 11.198   | 11.494   | 11.791   | 12.089   | 12.387    |  |
| b                                                     | 1813.696 | 1824.968                                                      | 1834.47  | 1843.786 | 1852.753 | 1861.408 | 1869.764 | 1877.835 | 1885.636 | 1893.318 | 1900.474 | 1907.536  |  |
| c                                                     | 253.152  | 247.516                                                       | 242.765  | 238.107  | 233.636  | 229.296  | 225.118  | 221.082  | 217.182  | 213.411  | 209.763  | 206.232   |  |
| C                                                     | 2075.971 | 2081.931                                                      | 2086.967 | 2091.917 | 2105.705 | 2101.313 | 2105.785 | 2110.115 | 2114.312 | 2118.52  | 2122.326 | 2126.155  |  |
| Ac                                                    | 2320     | 2320                                                          | 2320     | 2320     | 2320     | 2320     | 2320     | 2320     | 2320     | 2320     | 2320     | 2320      |  |
| Ab                                                    | 2424.174 | 2421.941                                                      | 2420.07  | 2418.224 | 2416.444 | 2414.725 | 2413.063 | 2,411    | 2409.899 | 2408.392 | 2406.933 | 2405.519  |  |
| Ksp                                                   | 4.30E-07 | 4.30E-07                                                      | 4.30E-07 | 4.30E-07 | 4.30E-07 | 4.30E-07 | 4.30E-07 | 4.30E-07 | 4.30E-07 | 4.30E-07 | 4.30E-07 | 4.30E-07  |  |
| K [Ca <sup>2+</sup> ][CO <sub>3</sub> <sup>2-</sup> ] | 5.01E-07 | 4.90E-07                                                      | 4.81E-07 | 4.71E-07 | 4.63E-07 | 4.54E-07 | 4.46E-07 | 4.38E-07 | 4.30E-07 | 4.23E-07 | 4.15E-07 | 4.08E-07  |  |
| Ω                                                     | 1.165668 | 1.139716                                                      | 1.11784  | 1.096392 | 1.075746 | 1.055819 | 1.036582 | 1.017999 | 1.00004  | 9.83E-08 | 0.965877 | 0.94962   |  |
| pH                                                    | 8.18     | 8.16753                                                       | 8.15686  | 8.14624  | 8.13588  | 8.12574  | 8.11581  | 8.10608  | 8.09654  | 8.09E+00 | 8.07805  | 8.06907   |  |
| Temperature K                                         | 293.15   | 293.15                                                        | 293.15   | 293.15   | 293.15   | 293.15   | 293.15   | 293.15   | 293.15   | 293.15   | 293.15   | 293.15    |  |
| Total pCO2 ppmv                                       | 281.508  | 291.508                                                       | 300.316  | 309.309  | 318.319  | 327.364  | 336.44   | 345.545  | 354.679  | 3.64E+02 | 373.026  | 382.237   |  |
|                                                       |          |                                                               |          |          |          |          |          |          |          |          |          |           |  |
| TITRATE 7F                                            |          | I=11,T=0.00002,A=2.32,P=8.18,K=293.15,S=35                    |          |          |          |          |          |          |          |          |          | CO2TIT3   |  |
| Years CO2                                             | 0        | 10                                                            | 20       | 30       | 40       | 50       | 60       | 70       | 80       | 90       | 100      | 110       |  |
| a                                                     | 9.123    | 9.771                                                         | 10.344   | 10.93    | 11.52    | 12.113   | 12.709   | 13.309   | 13.911   | 14.516   | 15.123   | 15.732    |  |
| b                                                     | 1813.696 | 1835.726                                                      | 1853.587 | 1870.517 | 1886.293 | 1901.053 | 1914.488 | 1927.867 | 1940.076 | 1951.574 | 1962.419 | 1972.665  |  |
| c                                                     | 253.152  | 242.137                                                       | 233.206  | 224.742  | 216.853  | 209.473  | 202.558  | 196.066  | 189.962  | 184.213  | 178.79   | 173.668   |  |
| C                                                     | 2075.971 | 2087.634                                                      | 2097.137 | 2106.189 | 2114.666 | 2122.639 | 2129.755 | 2137.242 | 2143.949 | 2150.303 | 2156.332 | 2162.065  |  |
| Ac                                                    | 2320     | 2320                                                          | 2320     | 2320     | 2320     | 2320     | 2320     | 2320     | 2320     | 2320     | 2320     | 2320      |  |
| Ab                                                    | 2424.174 | 2419.821                                                      | 2416.279 | 2412.913 | 2409.767 | 2406.817 | 2404.046 | 2401.44  | 2398.983 | 2396.665 | 2394.475 | 2392.402  |  |
| Ksp                                                   | 4.30E-07 | 4.30E-07                                                      | 4.30E-07 | 4.30E-07 | 4.30E-07 | 4.30E-07 | 4.30E-07 | 4.30E-07 | 4.30E-07 | 4.30E-07 | 4.30E-07 | 4.30E-07  |  |
| K [Ca <sup>2+</sup> ][CO <sub>3</sub> <sup>2-</sup> ] | 5.01E-07 | 4.79E-07                                                      | 4.62E-07 | 4.45E-07 | 4.29E-07 | 4.15E-07 | 4.01E-07 | 3.88E-07 | 3.76E-07 | 3.65E-07 | 3.54E-07 | 3.44E+00  |  |
| Ω                                                     | 1.165668 | 1.114946                                                      | 1.073826 | 1.034848 | 0.998526 | 0.964545 | 0.932702 | 0.90281  | 0.874703 | 0.848231 | 0.82326  | 0.799672  |  |
| pH                                                    | 8.18     | 8.15543                                                       | 8.13491  | 8.1149   | 8.09574  | 8.07732  | 8.05959  | 8.04251  | 8.02603  | 8.01012  | 7.99473  | 7.97985   |  |
| Temperature K                                         | 293.15   | 293.15                                                        | 293.15   | 293.15   | 293.15   | 293.15   | 293.15   | 293.15   | 293.15   | 293.15   | 293.15   | 293.15    |  |
| Total pCO2 ppmv                                       | 281.508  | 301.508                                                       | 319.176  | 337.275  | 355.465  | 373.769  | 392.175  | 410.672  | 429.254  | 447.913  | 466.642  | 485.436   |  |
|                                                       |          |                                                               |          |          |          |          |          |          |          |          |          |           |  |
| TITRATE 7G                                            |          | I=11,T=0.000005,U=-0.0444,A=2.32,P=8.18,K=293.15,S=35         |          |          |          |          |          |          |          |          |          | CO2TIT3   |  |
| Years                                                 | 0        | 10                                                            | 20       | 30       | 40       | 50       | 60       | 70       | 80       | 90       | 100      | 110       |  |
| a                                                     | 9.123    | 9.285                                                         | 9.664    | 10.022   | 10.387   | 10.755   | 11.126   | 11.501   | 11.88    | 12.261   | 12.646   | 13.034    |  |
| b                                                     | 1813.696 | 1790.677                                                      | 1773.971 | 1755.178 | 1735.304 | 1714.295 | 1692.207 | 1669.083 | 1644.965 | 1619.894 | 1593.908 | 1567.046  |  |
| c                                                     | 253.152  | 242.461                                                       | 228.615  | 215.811  | 203.548  | 191.852  | 180.696  | 170.059  | 159.917  | 150.253  | 141.046  | 132.277   |  |
| C                                                     | 2075.971 | 2042.423                                                      | 2012.25  | 1981.011 | 1949.239 | 1916.902 | 1884.029 | 1850.643 | 1816.762 | 1782.408 | 1747.6   | 1712.357  |  |
| Ac                                                    | 2320     | 2275.6                                                        | 2231.2   | 2186.8   | 2142.4   | 2098     | 2053.6   | 2009.2   | 1964.8   | 1920.4   | 1876     | 1831.6    |  |
| Ab                                                    | 2424.174 | 2377.42                                                       | 2329.268 | 2281.39  | 2233.591 | 2185.889 | 2138.28  | 2090.759 | 2043.326 | 1995.977 | 1948.71  | 1,901,522 |  |
| Ksp                                                   | 4.30E-07 | 4.30E-07                                                      | 4.30E-07 | 4.30E-07 | 4.30E-07 | 4.30E-07 | 4.30E-07 | 4.30E-07 | 4.30E-07 | 4.30E-07 | 4.30E-07 | 4.30E-07  |  |
| K [Ca <sup>2+</sup> ][CO <sub>3</sub> <sup>2-</sup> ] | 5.01E-07 | 4.80E-07                                                      | 4.53E-07 | 4.27E-07 | 4.03E-07 | 3.80E-07 | 3.58E-07 | 3.37E-07 | 3.17E-07 | 2.98E-07 | 2.79E-07 | 2.62E-07  |  |
| Ω                                                     | 1.165668 | 1.116439                                                      | 1.052682 | 0.993726 | 0.93726  | 0.883406 | 0.832037 | 0.736358 | 0.736358 | 0.691858 | 0.649462 | 0.609085  |  |
| pH                                                    | 8.18     | 8.16681                                                       | 8.14534  | 8.12493  | 8.10447  | 8.08406  | 8.063679 | 8.0433   | 8.02292  | 8.00252  | 7.98207  | 7.96158   |  |
| Temperature K                                         | 293.15   | 293.15                                                        | 293.15   | 293.15   | 293.15   | 293.15   | 293.15   | 293.15   | 293.15   | 293.15   | 293.15   | 293.15    |  |
| Total pCO2 ppmv                                       | 281.508  | 286.508                                                       | 298.218  | 309.252  | 320.5    | 331.855  | 343.322  | 354.896  | 366.574  | 378.35   | 390.221  | 402.182   |  |
|                                                       |          |                                                               |          |          |          |          |          |          |          |          |          |           |  |
| TITRATE 7H                                            |          | I=11,T=0.00001,U=-0.0666,L=0.0333,A=2.32,P=8.18,K=293.15,S=35 |          |          |          |          |          |          |          |          |          | CO2TIT3   |  |
| Years                                                 | 0        | 10                                                            | 20       | 30       | 40       | 50       | 60       | 70       | 80       | 90       | 100      | 110       |  |
| a                                                     | 9.123    | 9.447                                                         | 10.089   | 10.56    | 11.052   | 11.545   | 12.042   | 12.54    | 13.04    | 13.543   | 14.047   | 14.552    |  |
| b                                                     | 1813.696 | 1781.61                                                       | 1801.635 | 1815.238 | 1828.591 | 1841.144 | 1853.013 | 1864.245 | 1874.889 | 1884.988 | 1894.58  | 1903.703  |  |
| c                                                     | 253.152  | 235.895                                                       | 225.882  | 219.081  | 212.404  | 206.128  | 200.194  | 194.577  | 189.255  | 184.206  | 179.41   | 174.849   |  |
| C                                                     | 2075.971 | 2026.952                                                      | 2037.606 | 2044.879 | 2052.047 | 2058.817 | 2065.249 | 2071.362 | 2077.184 | 2082.737 | 2088.037 | 2093.104  |  |
| Ac                                                    | 2320     | 2253.4                                                        | 2320     | 2253.4   | 2253.4   | 2320     | 2253.4   | 2253.4   | 2320     | 2253.4   | 2253.4   | 2320      |  |
| Ab                                                    | 2424.174 | 2353.51                                                       | 2349.422 | 2346.637 | 2343.897 | 2341.316 | 2338.871 | 2336.552 | 2334.35  | 2333.258 | 2330.267 | 2328.37   |  |
| Ksp                                                   | 4.30E-07 | 4.30E-07                                                      | 4.30E-07 | 4.30E-07 | 4.30E-07 | 4.30E-07 | 4.30E-07 | 4.30E-07 | 4.30E-07 | 4.30E-07 | 4.30E-07 | 4.30E-07  |  |
| K [Ca <sup>2+</sup> ][CO <sub>3</sub> <sup>2-</sup> ] | 5.01E-07 | 4.67E-07                                                      | 4.47E-07 | 4.34E-07 | 4.21E-07 | 4.08E-07 | 3.96E-07 | 3.85E-07 | 3.75E-07 |          | 3.55E-07 | 3.46E-07  |  |
| Ω                                                     | 1.165668 | 1.086205                                                      | 1.040101 | 1.008785 | 0.97804  | 0.94914  | 0.921814 | 0.895954 | 0.871448 | 0.848198 | 0.826113 | 0.80511   |  |
| pH                                                    | 8.18     | 8.15709                                                       | 8.13334  | 8.11685  | 8.10022  | 8.08423  | 8.06875  | 8.05377  | 8.03925  | 8.02518  | 8.01151  | 7.99825   |  |
| Temperature K                                         | 293.15   | 293.15                                                        | 293.15   | 293.15   | 293.15   | 293.15   | 293.15   | 293.15   | 293.15   | 293.15   | 293.15   | 293.15    |  |
| Total pCO2 ppmv                                       | 281.508  | 291.508                                                       | 311.312  | 325.841  | 341.047  | 356.273  | 371.579  | 386.953  | 402.39   | 417.885  | 433.435  | 449.035   |  |

| TITRATE 7I                                            |          | I=11,T=0.00001,U=-0.0333,,A=2.32,P=8.18,K=293.15,S=35 |          |          |          |          |          |          |          |          |          |          |
|-------------------------------------------------------|----------|-------------------------------------------------------|----------|----------|----------|----------|----------|----------|----------|----------|----------|----------|
| Years                                                 | 0        | 10                                                    | 20       | 30       | 40       | 50       | 60       | 70       | 80       | 90       | 100      | 110      |
| a                                                     | 9.123    | 9.447                                                 | 9.911    | 10.362   | 10.821   | 11.283   | 11.748   | 12.219   | 12.692   | 13.169   | 13.648   | 14.131   |
| b                                                     | 1813.696 | 1803.334                                              | 1796.251 | 1787.257 | 1777.021 | 1765.559 | 1752.953 | 1739.266 | 1724.564 | 1708.904 | 1692.343 | 1674.932 |
| c                                                     | 253.152  | 241.683                                               | 228.574  | 216.422  | 204.89   | 193.97   | 183.624  | 173.817  | 164.518  | 155.698  | 147.328  | 139.384  |
| C                                                     | 2075.971 | 2054.464                                              | 2034.736 | 2014.041 | 1992.732 | 1970.812 | 1948.325 | 1925.302 | 1901.774 | 1877.771 | 1853.319 | 1828.447 |
| Ac                                                    | 2320     | 2286.7                                                | 2253.4   | 2220.1   | 2186.8   | 2153.5   | 2120.2   | 2086.9   | 2053.6   | 2020.3   | 1987     | 1953.7   |
| Ab                                                    | 2424.174 | 2387.734                                              | 2350.523 | 2313.578 | 2276.774 | 2203.592 | 2203.592 | 2167.199 | 2130.93  | 2094.777 | 2058.734 | 2022.797 |
| Ksp                                                   | 4.30E-07 | 4.30E-07                                              | 4.30E-07 | 4.30E-07 | 4.30E-07 | 4.30E-07 | 4.30E-07 | 4.30E-07 | 4.30E-07 | 4.30E-07 | 4.30E-07 | 4.30E-07 |
| K [Ca <sup>2+</sup> ][CO <sub>3</sub> <sup>2-</sup> ] | 5.01E-07 | 4.79E-07                                              | 4.53E-07 | 4.29E-07 | 4.06E-07 | 3.84E-07 | 3.64E-07 | 3.44E-07 | 3.26E-07 | 3.08E-07 | 2.92E-07 | 2.76E-07 |
| Ω                                                     | 1.165668 | 1.112856                                              | 1.052496 | 0.996538 | 0.943438 | 0.893157 | 0.845516 | 0.80036  | 0.757542 | 0.716928 | 0.67839  | 0.64181  |
| pH                                                    | 8.18     | 8.16235                                               | 8.13984  | 8.1183   | 8.09701  | 8.07604  | 8.05534  | 8.03491  | 8.014717 | 7.99475  | 7.97498  | 7.9554   |
| Temperature K                                         | 293.15   | 293.15                                                | 293.15   | 293.15   | 293.15   | 293.15   | 293.15   | 293.15   | 293.15   | 293.15   | 293.15   | 293.15   |
| Total pCO2 ppmv                                       | 281.508  | 291.508                                               | 305.81   | 319.755  | 333.894  | 348.156  | 362.54   | 377.037  | 391.642  | 406.348  | 421.148  | 436.038  |
|                                                       |          |                                                       |          |          |          |          |          |          |          |          |          |          |
| TITRATE 7J                                            |          | I=11,U=-0.0333,A=2.32,P=8.18,K=293.15,S=35            |          |          |          |          |          |          |          |          |          |          |
| Years                                                 | 0        | 10                                                    | 20       | 30       | 40       | 50       | 60       | 70       | 80       | 90       | 100      | 110      |
| a                                                     | 9.123    | 9.123                                                 | 9.3      | 9.457    | 9.618    | 9.78     | 9.943    | 10.107   | 10.273   | 10.439   | 10.607   | 10.776   |
| b                                                     | 1813.696 | 1792.281                                              | 1776.767 | 1760.123 | 1743.18  | 1725.85  | 1708.147 | 1690.075 | 1671.637 | 1652.839 | 1633.684 | 1614.177 |
| c                                                     | 253.152  | 247.21                                                | 238.316  | 229.989  | 221.81   | 213.825  | 206.027  | 198.413  | 190.982  | 183.731  | 176.64   | 169.761  |
| C                                                     | 2075.971 | 2048.614                                              | 2024.383 | 1999.569 | 1974.608 | 1949.455 | 1924.117 | 1898.595 | 1872.892 | 1847.009 | 1821.931 | 1794.714 |
| Ac                                                    | 2320     | 2286.7                                                | 2253.4   | 2220.1   | 2186.8   | 2153.5   | 2120.2   | 2086.9   | 2053.6   | 2020.3   | 1987     | 1953.7   |
| Ab                                                    | 2424.174 | 2389.95                                               | 2354.496 | 2319.208 | 2283.919 | 2248.647 | 2213.392 | 2178.152 | 2142.937 | 2107.723 | 2072.532 | 2037.358 |
| Ksp                                                   | 4.30E-07 | 4.30E-07                                              | 4.30E-07 | 4.30E-07 | 4.30E-07 | 4.30E-07 | 4.30E-07 | 4.30E-07 | 4.30E-07 | 4.30E-07 | 4.30E-07 | 4.30E-07 |
| K [Ca <sup>2+</sup> ][CO <sub>3</sub> <sup>2-</sup> ] | 5.01E-07 | 4.89E-07                                              | 4.72E-07 | 4.55E-07 | 4.39E-07 | 4.23E-07 | 4.08E-07 | 3.93E-07 | 3.78E-07 | 3.64E-07 | 3.50E-07 | 3.36E-07 |
| Ω                                                     | 1.165668 | 1.138304                                              | 1.097355 | 1.059009 | 1.02135  | 0.984582 | 0.948672 | 0.913614 | 0.879396 | 0.846009 | 0.813442 | 0.781685 |
| pH                                                    | 8.18     | 8.174842                                              | 8.16271  | 8.15135  | 8.13982  | 8.12824  | 8.11658  | 8.10485  | 8.09302  | 8.08113  | 8.06915  | 8.05707  |
| Temperature K                                         | 293.15   | 293.15                                                | 293.15   | 293.15   | 293.15   | 293.15   | 293.15   | 293.15   | 293.15   | 293.15   | 293.15   | 293.15   |
| Total pCO2 ppmv                                       | 281.508  | 281.508                                               | 286.98   | 291.826  | 296.789  | 301.78   | 306.811  | 311.879  | 316.983  | 322.124  | 327.301  | 332.513  |
|                                                       |          |                                                       |          |          |          |          |          |          |          |          |          |          |
| TITRATE 7K                                            |          | I=11,U=-0.0666,A=2.32,P=8.18,K=293.15,S=35            |          |          |          |          |          |          |          |          |          |          |
| Years                                                 | 0        | 10                                                    | 20       | 30       | 40       | 50       | 60       | 70       | 80       | 90       | 100      | 110      |
| a                                                     | 9.123    | 9.123                                                 | 9.478    | 9.795    | 10.122   | 10.453   | 10.789   | 11.129   | 11.474   | 11.823   | 12.176   | 12.538   |
| b                                                     | 1813.696 | 1770.775                                              | 1738.849 | 1703.964 | 1667.745 | 1630.061 | 1590.963 | 1550.483 | 1508.657 | 1465.52  | 1421.107 | 1375.453 |
| c                                                     | 253.152  | 241.312                                               | 223.976  | 208.118  | 192.927  | 178.469  | 164.719  | 151.659  | 139.272  | 127.54   | 116.447  | 105.974  |
| C                                                     | 2075.971 | 2021.21                                               | 1972.303 | 1921.877 | 1870.794 | 1818.983 | 1766.471 | 1713.271 | 1659.403 | 1604.883 | 1549.73  | 1493.965 |
| Ac                                                    | 2320     | 2253.4                                                | 2186.8   | 2120.2   | 2053.6   | 1987     | 1920.4   | 1853.8   | 1787.2   | 1720.6   | 1654     | 1587.4   |
| Ab                                                    | 2424.174 | 2355.716                                              | 2284.83  | 2214.303 | 2143.807 | 2073.379 | 2003.016 | 1932.717 | 1862.484 | 1792.315 | 1722.211 | 1652.171 |
| Ksp                                                   | 4.30E-07 | 4.30E-07                                              | 4.30E-07 | 4.30E-07 | 4.30E-07 | 4.30E-07 | 4.30E-07 | 4.30E-07 | 4.30E-07 | 4.30E-07 | 4.30E-07 | 4.30E-07 |
| K [Ca <sup>2+</sup> ][CO <sub>3</sub> <sup>2-</sup> ] | 5.01E-07 | 4.78E-07                                              | 4.43E-07 | 4.12E-07 | 3.82E-07 | 3.53E-07 | 3.26E-07 | 3.00E-07 | 2.76E-07 | 2.53E-07 | 2.31E-07 | 2.10E-07 |
| Ω                                                     | 1.165668 | 1.111151                                              | 1.031213 | 0.958304 | 0.888356 | 0.821782 | 0.758466 | 0.698329 | 0.641292 | 0.587273 | 0.536191 | 0.487968 |
| pH                                                    | 8.18     | 8.1696                                                | 8.14512  | 8.12203  | 8.09844  | 8.07454  | 8.05027  | 8.02558  | 8.00045  | 7.97484  | 7.94868  | 7.92193  |
| Temperature K                                         | 293.15   | 293.15                                                | 293.15   | 293.15   | 293.15   | 293.15   | 293.15   | 293.15   | 293.15   | 293.15   | 293.15   | 293.15   |
| Total pCO2 ppmv                                       | 281.508  | 281.508                                               | 292.46   | 302.242  | 312.327  | 322.544  | 332.906  | 343.408  | 354.048  | 364.822  | 375.726  | 386.756  |
|                                                       |          |                                                       |          |          |          |          |          |          |          |          |          |          |
| TITRATE 7L                                            |          | I=11,U=-0.0666,L=0.0333,A=2.32,P=8.18,K=293.15,S=35   |          |          |          |          |          |          |          |          |          |          |
| Years                                                 | 0        | 10                                                    | 20       | 30       | 40       | 50       | 60       | 70       | 80       | 90       | 100      | 110      |
| a                                                     | 9.123    | 9.123                                                 | 9.4779   | 9.653    | 9.85     | 10.044   | 10.24    | 10.435   | 10.632   | 10.828   | 11.025   | 11.223   |
| b                                                     | 1813.696 | 1770.775                                              | 1782.615 | 1788.238 | 1794.38  | 1800.3   | 1806.085 | 1811.731 | 1817.242 | 1822.625 | 1827.882 | 1833.018 |
| c                                                     | 253.152  | 241.312                                               | 235.392  | 232.581  | 229.51   | 226.55   | 223.658  | 220.835  | 218.079  | 215.388  | 212.759  | 210.191  |
| C                                                     | 2075.971 | 2021.21                                               | 2027.485 | 2030.472 | 2033.74  | 2036.894 | 2039.983 | 2043.001 | 2045.953 | 2048.841 | 2051.666 | 2054.432 |
| Ac                                                    | 2320     | 2253.4                                                | 2320     | 2253.4   | 2186.8   | 2320     | 2186.8   | 2253.4   | 2320     | 2253.4   | 2186.8   | 2253.4   |
| Ab                                                    | 2424.174 | 2355.716                                              | 2353.305 | 2352.158 | 2350.09  | 2349.695 | 2348.512 | 2347.356 | 2346.226 | 2345.122 | 2344.043 | 2342.988 |
| Ksp                                                   | 4.30E-07 | 4.30E-07                                              | 4.30E-07 | 4.30E-07 | 4.30E-07 | 4.30E-07 | 4.30E-07 | 4.30E-07 | 4.32E-07 | 4.30E-07 | 4.30E-07 | 4.30E-07 |
| K [Ca <sup>2+</sup> ][CO <sub>3</sub> <sup>2-</sup> ] | 5.01E-07 | 4.78E-07                                              | 4.66E-07 | 4.61E-07 | 4.54E-07 | 4.49E-07 | 4.43E-07 | 4.37E-07 | 4.32E-07 | 4.26E-07 | 4.21E-07 | 4.16E-07 |
| Ω                                                     | 1.165668 | 1.111151                                              | 1.083891 | 1.070947 | 1.056806 | 1.043175 | 1.029856 | 1.016859 | 1.004169 | 0.991777 | 0.979673 | 0.967848 |
| pH                                                    | 8.18     | 8.1696                                                | 8.15592  | 8.14933  | 8.14207  | 8.135    | 8.12803  | 8.12116  | 8.11438  | 8.10771  | 8.10112  | 8.09463  |
| Temperature K                                         | 293.15   | 293.15                                                | 293.15   | 293.15   | 293.15   | 293.15   | 293.15   | 293.15   | 293.15   | 293.15   | 293.15   | 293.15   |
| Total pCO2 ppmv                                       | 281.508  | 281.508                                               | 292.46   | 297.865  | 303.928  | 309.935  | 315.964  | 322.006  | 328.062  | 334.132  | 340.214  | 346.309  |

Oct 10 2020 TITRATE HN03 or CO2  
 CO2TIT1  
 Models Mauna Loa ti titration  
 Inputs pH, pCO2 T to compute C and A  
 Computes pCO2 from A, pH and Kelvin  
 Varies H,K1,K2,Kw,Kc with T & salt S  
 $C=[CO_2+HCO_3^-+CO_3^{2-}]$  total C mmoles/kg  
 $A=[HCO_3^-+2CO_3^{2-}+OH^-+H^++B(OH_4)]^-$   
 Alkalinity label  
 167 moles CO2/m<sup>2</sup> dCO2=1=0.4175 m/m<sup>2</sup>  
 Number increments A or pCO2  
 To limit CO2, use Khx0.75 at 1353  
 Omit M,T for dA; use U for dA

|      |     |         |
|------|-----|---------|
| 0520 | 096 | LABEL   |
| 0521 | 073 | I       |
| 0522 | 107 | STO MEM |
| 0523 | 048 | 0       |
| 0524 | 048 | 0       |
| 0525 | 119 | print   |
| 0526 | 002 | HALT    |

Margin, say 0.000001 for d(pCO2)

|      |     |         |
|------|-----|---------|
| 0567 | 096 | LABEL   |
| 0568 | 077 | M       |
| 0569 | 107 | STO MEM |
| 0570 | 057 | 9       |
| 0571 | 057 | 9       |
| 0572 | 119 | print   |
| 0573 | 002 | HALT    |

Input pCO2 trend 0.0000001 1 ppm

|      |     |         |
|------|-----|---------|
| 0614 | 096 | LABEL   |
| 0615 | 084 | T       |
| 0616 | 107 | STO MEM |
| 0617 | 055 | 7       |
| 0618 | 056 | 8       |
| 0619 | 119 | print   |
| 0620 | 002 | HALT    |

Add strong acid mmoles/kg -0.001

|      |     |         |
|------|-----|---------|
| 0661 | 096 | LABEL   |
| 0662 | 085 | U       |
| 0663 | 107 | STO MEM |
| 0664 | 056 | 8       |
| 0665 | 057 | 9       |
| 0666 | 119 | print   |
| 0667 | 002 | HALT    |

Alkalinity=[HCO3-]+2[CO32-]+B(OH+OH-)

|      |     |         |
|------|-----|---------|
| 0708 | 096 | LABEL   |
| 0709 | 065 | A       |
| 0710 | 107 | STO MEM |
| 0711 | 048 | 0       |
| 0712 | 049 | 1       |
| 0713 | 119 | print   |
| 0714 | 002 | HALT    |

Label C[CO2+HCO3-+CO32-] mmol/kg

|      |     |         |
|------|-----|---------|
| 0755 | 096 | LABEL   |
| 0756 | 067 | C       |
| 0757 | 107 | STO MEM |
| 0758 | 048 | 0       |
| 0759 | 056 | 8       |
| 0760 | 119 | print   |
| 0761 | 002 | HALT    |

Input pH value

|      |     |         |
|------|-----|---------|
| 0802 | 096 | LABEL   |
| 0803 | 080 | F       |
| 0804 | 107 | STO MEM |
| 0805 | 048 | 0       |
| 0806 | 051 | 3       |
| 0807 | 119 | print   |
| 0808 | 002 | HALT    |

Label pK1o

|      |     |         |
|------|-----|---------|
| 0849 | 096 | LABEL   |
| 0850 | 078 | N       |
| 0851 | 107 | STO MEM |
| 0852 | 048 | 0       |
| 0853 | 052 | 4       |
| 0854 | 119 | print   |
| 0855 | 002 | HALT    |

Label pK2o

|      |     |         |
|------|-----|---------|
| 0896 | 096 | LABEL   |
| 0897 | 079 | 0       |
| 0898 | 107 | STO MEM |
| 0899 | 048 | 0       |
| 0900 | 053 | 5       |
| 0901 | 119 | print   |
| 0902 | 002 | HALT    |

Label Henry's constant Ho

|      |     |         |
|------|-----|---------|
| 0943 | 096 | LABEL   |
| 0944 | 072 | H       |
| 0945 | 107 | STO MEM |
| 0946 | 048 | 0       |
| 0947 | 054 | 6       |
| 0948 | 119 | print   |
| 0949 | 002 | HALT    |

Input temperature K

|      |     |         |
|------|-----|---------|
| 0990 | 096 | LABEL   |
| 0991 | 075 | K       |
| 0992 | 107 | STO MEM |
| 0993 | 053 | 5       |
| 0994 | 055 | 7       |
| 0995 | 119 | print   |
| 0996 | 002 | HALT    |

Input salinity S %o g/kg

|      |     |         |
|------|-----|---------|
| 1037 | 096 | LABEL   |
| 1038 | 083 | S       |
| 1039 | 107 | STO MEM |
| 1040 | 048 | 0       |
| 1041 | 057 | 9       |
| 1042 | 119 | print   |
| 1043 | 002 | HALT    |

Input pCO2 atmospheres

|      |     |         |
|------|-----|---------|
| 1084 | 096 | LABEL   |
| 1085 | 090 | Z       |
| 1086 | 107 | STO MEM |
| 1087 | 049 | 1       |
| 1088 | 056 | 8       |
| 1089 | 119 | print   |
| 1090 | 002 | HALT    |

Execute

|      |     |       |
|------|-----|-------|
| 1131 | 096 | LABEL |
| 1132 | 088 | X     |
| 1133 | 040 | (     |

|                                                |     |         |      |     |         |
|------------------------------------------------|-----|---------|------|-----|---------|
| 1134                                           | 109 | RCL MEM | 1272 | 050 | 2       |
| 1135                                           | 053 | 5       | 1273 | 111 | +/-     |
| 1136                                           | 055 | 7       | 1274 | 041 | )       |
| 1137                                           | 107 | STD MEM | 1275 | 110 | LOG e   |
| 1138                                           | 048 | 0       | 1276 | 042 | x       |
| 1139                                           | 055 | 7       | 1277 | 050 | 2       |
| Get Bt =total borates                          |     |         | 1278 | 051 | 3       |
| 1180                                           | 040 | (       | 1279 | 046 | .       |
| 1181                                           | 048 | 0       | 1280 | 051 | 3       |
| 1182                                           | 046 | .       | 1281 | 053 | 5       |
| 1183                                           | 052 | 4       | 1282 | 056 | 8       |
| 1184                                           | 049 | 1       | 1283 | 053 | 5       |
| 1185                                           | 054 | 6       | 1284 | 041 | )       |
| 1186                                           | 042 | x       | 1285 | 043 | +       |
| 1187                                           | 040 | (       | 1286 | 040 | (       |
| 1188                                           | 109 | RCL MEM | 1287 | 109 | RCL MEM |
| 1189                                           | 048 | 0       | 1288 | 048 | 0       |
| 1190                                           | 057 | 9       | 1289 | 057 | 9       |
| 1191                                           | 047 | /       | 1290 | 042 | x       |
| 1192                                           | 051 | 3       | 1291 | 040 | (       |
| 1193                                           | 053 | 5       | 1292 | 048 | 0       |
| 1194                                           | 041 | )       | 1293 | 046 | .       |
| 1195                                           | 041 | )       | 1294 | 048 | 0       |
| 1196                                           | 119 | print   | 1295 | 050 | 2       |
| 1197                                           | 107 | STD MEM | 1296 | 051 | 3       |
| 1198                                           | 056 | 8       | 1297 | 053 | 5       |
| 1199                                           | 056 | 8       | 1298 | 049 | 1       |
| Get pK <sub>a</sub> Henry's coefficient repC02 |     |         | 1299 | 055 | 7       |
| 1240                                           | 040 | (       | 1300 | 045 | -       |
| 1241                                           | 048 | 0       | 1301 | 040 | (       |
| 1242                                           | 045 | -       | 1302 | 049 | 1       |
| 1243                                           | 054 | 6       | 1303 | 101 | EE      |
| 1244                                           | 048 | 0       | 1304 | 050 | 2       |
| 1245                                           | 046 | .       | 1305 | 111 | +/-     |
| 1246                                           | 050 | 2       | 1306 | 042 | x       |
| 1247                                           | 052 | 4       | 1307 | 109 | RCL MEM |
| 1248                                           | 048 | 0       | 1308 | 048 | 0       |
| 1249                                           | 057 | 9       | 1309 | 055 | 7       |
| 1250                                           | 043 | +       | 1310 | 041 | )       |
| 1251                                           | 040 | (       | 1311 | 042 | x       |
| 1252                                           | 057 | 9       | 1312 | 048 | 0       |
| 1253                                           | 051 | 3       | 1313 | 046 | .       |
| 1254                                           | 052 | 4       | 1314 | 048 | 0       |
| 1255                                           | 053 | 5       | 1315 | 050 | 2       |
| 1256                                           | 046 | .       | 1316 | 051 | 3       |
| 1257                                           | 049 | 1       | 1317 | 054 | 6       |
| 1258                                           | 055 | 7       | 1318 | 053 | 5       |
| 1259                                           | 047 | /       | 1319 | 054 | 6       |
| 1260                                           | 109 | RCL MEM | 1320 | 043 | +       |
| 1261                                           | 048 | 0       | 1321 | 040 | (       |
| 1262                                           | 055 | 7       | 1322 | 049 | 1       |
| 1263                                           | 041 | )       | 1323 | 101 | EE      |
| 1264                                           | 043 | +       | 1324 | 050 | 2       |
| 1265                                           | 040 | (       | 1325 | 111 | +/-     |
| 1266                                           | 109 | RCL MEM | 1326 | 042 | x       |
| 1267                                           | 048 | 0       | 1327 | 109 | RCL MEM |
| 1268                                           | 055 | 7       | 1328 | 048 | 0       |
| 1269                                           | 042 | x       | 1329 | 055 | 7       |
| 1270                                           | 049 | 1       | 1330 | 041 | )       |
| 1271                                           | 101 | EE      | 1331 | 113 | Square  |

|                                       |     |         |
|---------------------------------------|-----|---------|
| 1332                                  | 042 | x       |
| 1333                                  | 048 | 0       |
| 1334                                  | 046 | .       |
| 1335                                  | 048 | 0       |
| 1336                                  | 048 | 0       |
| 1337                                  | 052 | 4       |
| 1338                                  | 055 | 7       |
| 1339                                  | 048 | 0       |
| 1340                                  | 051 | 3       |
| 1341                                  | 054 | 6       |
| 1342                                  | 041 | )       |
| 1343                                  | 041 | )       |
| 1344                                  | 041 | )       |
| Print lnK'o function;give rate factor |     |         |
| 1385                                  | 119 | print   |
| 1386                                  | 064 | Inverse |
| 1387                                  | 110 | LOG e   |
| 1388                                  | 042 | x       |
| 1389                                  | 049 | 1       |
| 1390                                  | 101 | EE      |
| 1391                                  | 051 | 3       |
| 1392                                  | 042 | x       |
| 1393                                  | 049 | 1       |
| 1394                                  | 046 | .       |
| 1395                                  | 048 | 0       |
| 1396                                  | 048 | 0       |
| Print Ho' mM                          |     |         |
| 1437                                  | 061 | =       |
| 1438                                  | 119 | print   |
| 1439                                  | 107 | STD MEM |
| 1440                                  | 048 | 0       |
| 1441                                  | 054 | 6       |
| Get pk1'                              |     |         |
| 1482                                  | 040 | (       |
| 1483                                  | 040 | (       |
| 1484                                  | 051 | 3       |
| 1485                                  | 054 | 6       |
| 1486                                  | 055 | 7       |
| 1487                                  | 048 | 0       |
| 1488                                  | 046 | .       |
| 1489                                  | 055 | 7       |
| 1490                                  | 047 | /       |
| 1491                                  | 109 | RCL MEM |
| 1492                                  | 048 | 0       |
| 1493                                  | 055 | 7       |
| 1494                                  | 045 | -       |
| 1495                                  | 054 | 6       |
| 1496                                  | 050 | 2       |
| 1497                                  | 046 | .       |
| 1498                                  | 048 | 0       |
| 1499                                  | 048 | 0       |
| 1500                                  | 056 | 8       |
| 1501                                  | 043 | +       |
| 1502                                  | 040 | (       |
| 1503                                  | 109 | RCL MEM |
| 1504                                  | 048 | 0       |
| 1505                                  | 055 | 7       |
| 1506                                  | 110 | LOG e   |
| 1507                                  | 042 | x       |
| 1508                                  | 057 | 9       |

|            |     |         |
|------------|-----|---------|
| 1509       | 046 | .       |
| 1510       | 055 | 7       |
| 1511       | 057 | 9       |
| 1512       | 052 | 4       |
| 1513       | 052 | 4       |
| 1514       | 041 | )       |
| 1515       | 045 | -       |
| 1516       | 040 | (       |
| 1517       | 048 | 0       |
| 1518       | 046 | .       |
| 1519       | 048 | 0       |
| 1520       | 049 | 1       |
| 1521       | 049 | 1       |
| 1522       | 056 | 8       |
| 1523       | 042 | x       |
| 1524       | 109 | RCL MEM |
| 1525       | 048 | 0       |
| 1526       | 057 | 9       |
| 1527       | 041 | )       |
| 1528       | 043 | +       |
| 1529       | 040 | (       |
| 1530       | 109 | RCL MEM |
| 1531       | 048 | 0       |
| 1532       | 057 | 9       |
| 1533       | 113 | Square  |
| 1534       | 042 | x       |
| 1535       | 048 | 0       |
| 1536       | 046 | .       |
| 1537       | 048 | 0       |
| 1538       | 048 | 0       |
| 1539       | 048 | 0       |
| 1540       | 049 | 1       |
| 1541       | 049 | 1       |
| 1542       | 054 | 6       |
| 1543       | 041 | )       |
| 1544       | 041 | )       |
| Print pk1' |     |         |
| 1585       | 119 | print   |
| 1586       | 107 | STD MEM |
| 1587       | 048 | 0       |
| 1588       | 052 | 4       |
| Get pk2'   |     |         |
| 1629       | 040 | (       |
| 1630       | 040 | (       |
| 1631       | 049 | 1       |
| 1632       | 051 | 3       |
| 1633       | 057 | 9       |
| 1634       | 052 | 4       |
| 1635       | 046 | .       |
| 1636       | 055 | 7       |
| 1637       | 047 | /       |
| 1638       | 109 | RCL MEM |
| 1639       | 048 | 0       |
| 1640       | 055 | 7       |
| 1641       | 041 | )       |
| 1642       | 043 | +       |
| 1643       | 052 | 4       |
| 1644       | 046 | .       |
| 1645       | 055 | 7       |
| 1646       | 055 | 7       |

|                             |     |         |      |     |         |
|-----------------------------|-----|---------|------|-----|---------|
| 1647                        | 055 | 7       | 1785 | 045 | -       |
| 1648                        | 045 | -       | 1786 | 040 | (       |
| 1649                        | 048 | 0       | 1787 | 109 | RCL MEM |
| 1650                        | 046 | .       | 1788 | 048 | 0       |
| 1651                        | 048 | 0       | 1789 | 055 | 7       |
| 1652                        | 049 | 1       | 1790 | 110 | LOG e   |
| 1653                        | 056 | 8       | 1791 | 042 | x       |
| 1654                        | 052 | 4       | 1792 | 050 | 2       |
| 1655                        | 042 | x       | 1793 | 051 | 3       |
| 1656                        | 109 | RCL MEM | 1794 | 046 | .       |
| 1657                        | 048 | 0       | 1795 | 054 | 6       |
| 1658                        | 057 | 9       | 1796 | 053 | 5       |
| 1659                        | 043 | +       | 1797 | 050 | 2       |
| 1660                        | 040 | (       | 1798 | 049 | 1       |
| 1661                        | 109 | RCL MEM | 1799 | 041 | )       |
| 1662                        | 048 | 0       | 1800 | 043 | +       |
| 1663                        | 057 | 9       | 1801 | 040 | (       |
| 1664                        | 113 | Square  | 1802 | 040 | (       |
| 1665                        | 042 | x       | 1803 | 040 | (       |
| 1666                        | 048 | 0       | 1804 | 049 | 1       |
| 1667                        | 046 | .       | 1805 | 049 | 1       |
| 1668                        | 048 | 0       | 1806 | 056 | 8       |
| 1669                        | 048 | 0       | 1807 | 046 | .       |
| 1670                        | 048 | 0       | 1808 | 054 | 6       |
| 1671                        | 049 | 1       | 1809 | 055 | 7       |
| 1672                        | 049 | 1       | 1810 | 047 | /       |
| 1673                        | 056 | 8       | 1811 | 109 | RCL MEM |
| 1674                        | 041 | )       | 1812 | 048 | 0       |
| 1675                        | 041 | )       | 1813 | 055 | 7       |
| Print pk2'                  |     |         | 1814 | 041 | )       |
| 1716                        | 119 | print   | 1815 | 045 | -       |
| 1717                        | 107 | STD MEM | 1816 | 053 | 5       |
| 1718                        | 048 | 0       | 1817 | 046 | .       |
| 1719                        | 053 | 5       | 1818 | 057 | 9       |
| Get water dissociation lnKw |     |         | 1819 | 055 | 7       |
| 1760                        | 040 | (       | 1820 | 055 | 7       |
| 1761                        | 049 | 1       | 1821 | 043 | +       |
| 1762                        | 052 | 4       | 1822 | 040 | (       |
| 1763                        | 056 | 8       | 1823 | 109 | RCL MEM |
| 1764                        | 046 | .       | 1824 | 048 | 0       |
| 1765                        | 057 | 9       | 1825 | 055 | 7       |
| 1766                        | 054 | 6       | 1826 | 110 | LOG e   |
| 1767                        | 053 | 5       | 1827 | 042 | x       |
| 1768                        | 048 | 0       | 1828 | 049 | 1       |
| 1769                        | 050 | 2       | 1829 | 046 | .       |
| 1770                        | 045 | -       | 1830 | 048 | 0       |
| 1771                        | 040 | (       | 1831 | 052 | 4       |
| 1772                        | 049 | 1       | 1832 | 057 | 9       |
| 1773                        | 051 | 3       | 1833 | 053 | 5       |
| 1774                        | 056 | 8       | 1834 | 041 | )       |
| 1775                        | 052 | 4       | 1835 | 041 | )       |
| 1776                        | 055 | 7       | 1836 | 042 | x       |
| 1777                        | 046 | .       | 1837 | 109 | RCL MEM |
| 1778                        | 050 | 2       | 1838 | 048 | 0       |
| 1779                        | 054 | 6       | 1839 | 057 | 9       |
| 1780                        | 047 | /       | 1840 | 064 | Inverse |
| 1781                        | 109 | RCL MEM | 1841 | 113 | Square  |
| 1782                        | 048 | 0       | 1842 | 041 | )       |
| 1783                        | 055 | 7       | 1843 | 041 | )       |
| 1784                        | 041 | )       | 1844 | 045 | -       |

|                                        |     |         |      |     |         |
|----------------------------------------|-----|---------|------|-----|---------|
| 1845                                   | 048 | 0       | 2022 | 109 | RCL MEM |
| 1846                                   | 046 | .       | 2023 | 048 | 0       |
| 1847                                   | 048 | 0       | 2024 | 055 | 7       |
| 1848                                   | 049 | 1       | 2025 | 041 | )       |
| 1849                                   | 054 | 6       | 2026 | 045 | -       |
| 1850                                   | 049 | 1       | 2027 | 040 | (       |
| 1851                                   | 053 | 5       | 2028 | 109 | RCL MEM |
| 1852                                   | 042 | x       | 2029 | 048 | 0       |
| 1853                                   | 109 | RCL MEM | 2030 | 055 | 7       |
| 1854                                   | 048 | 0       | 2031 | 108 | LOG 10  |
| 1855                                   | 057 | 9       | 2032 | 042 | x       |
| 1856                                   | 041 | )       | 2033 | 055 | 7       |
| Print ln Kw                            |     |         | 2034 | 049 | 1       |
| 1897                                   | 119 | print   | 2035 | 046 | .       |
| 1898                                   | 107 | STO MEM | 2036 | 053 | 5       |
| 1899                                   | 048 | 0       | 2037 | 057 | 9       |
| 1900                                   | 050 | 2       | 2038 | 053 | 5       |
| 1901                                   | 064 | Inverse | 2039 | 041 | )       |
| 1902                                   | 110 | LOG e   | 2040 | 043 | +       |
| Print Kw                               |     |         | 2041 | 040 | (       |
| 1943                                   | 119 | print   | 2042 | 048 | 0       |
| 1944                                   | 107 | STO MEM | 2043 | 046 | .       |
| 1945                                   | 054 | 6       | 2044 | 055 | 7       |
| 1946                                   | 049 | 1       | 2045 | 055 | 7       |
| Get calcite pKs for solubility product |     |         | 2046 | 055 | 7       |
| 1987                                   | 040 | (       | 2047 | 049 | 1       |
| 1988                                   | 049 | 1       | 2048 | 050 | 2       |
| 1989                                   | 055 | 7       | 2049 | 045 | -       |
| 1990                                   | 049 | 1       | 2050 | 040 | (       |
| 1991                                   | 046 | .       | 2051 | 048 | 0       |
| 1992                                   | 057 | 9       | 2052 | 046 | .       |
| 1993                                   | 048 | 0       | 2053 | 048 | 0       |
| 1994                                   | 054 | 6       | 2054 | 048 | 0       |
| 1995                                   | 053 | 5       | 2055 | 050 | 2       |
| 1996                                   | 043 | +       | 2056 | 056 | 8       |
| 1997                                   | 040 | (       | 2057 | 052 | 4       |
| 1998                                   | 048 | 0       | 2058 | 050 | 2       |
| 1999                                   | 046 | .       | 2059 | 054 | 6       |
| 2000                                   | 048 | 0       | 2060 | 042 | x       |
| 2001                                   | 055 | 7       | 2061 | 109 | RCL MEM |
| 2002                                   | 055 | 7       | 2062 | 048 | 0       |
| 2003                                   | 057 | 9       | 2063 | 055 | 7       |
| 2004                                   | 057 | 9       | 2064 | 041 | )       |
| 2005                                   | 051 | 3       | 2065 | 045 | -       |
| 2006                                   | 042 | x       | 2066 | 040 | (       |
| 2007                                   | 109 | RCL MEM | 2067 | 049 | 1       |
| 2008                                   | 048 | 0       | 2068 | 055 | 7       |
| 2009                                   | 055 | 7       | 2069 | 056 | 8       |
| 2010                                   | 041 | )       | 2070 | 046 | .       |
| 2011                                   | 045 | -       | 2071 | 051 | 3       |
| 2012                                   | 040 | (       | 2072 | 052 | 4       |
| 2013                                   | 050 | 2       | 2073 | 047 | /       |
| 2014                                   | 056 | 8       | 2074 | 109 | RCL MEM |
| 2015                                   | 051 | 3       | 2075 | 048 | 0       |
| 2016                                   | 057 | 9       | 2076 | 055 | 7       |
| 2017                                   | 046 | .       | 2077 | 041 | )       |
| 2018                                   | 051 | 3       | 2078 | 041 | )       |
| 2019                                   | 049 | 1       | 2079 | 042 | x       |
| 2020                                   | 057 | 9       | 2080 | 040 | (       |
| 2021                                   | 047 | /       | 2081 | 109 | RCL MEM |

|                                     |     |          |      |     |          |
|-------------------------------------|-----|----------|------|-----|----------|
| 2082                                | 048 | 0        | 2259 | 045 | -        |
| 2083                                | 057 | 9        | 2260 | 056 | 8        |
| 2084                                | 064 | Inverse  | 2261 | 057 | 9        |
| 2085                                | 113 | Square   | 2262 | 054 | 6        |
| 2086                                | 041 | )        | 2263 | 054 | 6        |
| 2087                                | 041 | )        | 2264 | 046 | .        |
| 2088                                | 043 | +        | 2265 | 057 | 9        |
| 2089                                | 040 | (        | 2266 | 048 | 0        |
| 2090                                | 048 | 0        | 2267 | 045 | -        |
| 2091                                | 046 | .        | 2268 | 109 | RCL MEM  |
| 2092                                | 048 | 0        | 2269 | 048 | 0        |
| 2093                                | 055 | 7        | 2270 | 057 | 9        |
| 2094                                | 055 | 7        | 2271 | 064 | Inverse  |
| 2095                                | 049 | 1        | 2272 | 113 | Square   |
| 2096                                | 049 | 1        | 2273 | 042 | x        |
| 2097                                | 042 | x        | 2274 | 050 | 2        |
| 2098                                | 109 | RCL MEM  | 2275 | 056 | 8        |
| 2099                                | 048 | 0        | 2276 | 057 | 9        |
| 2100                                | 057 | 9        | 2277 | 048 | 0        |
| 2101                                | 041 | )        | 2278 | 046 | .        |
| 2102                                | 045 | -        | 2279 | 053 | 5        |
| 2103                                | 040 | (        | 2280 | 051 | 3        |
| 2104                                | 048 | 0        | 2281 | 045 | -        |
| 2105                                | 046 | .        | 2282 | 109 | RCL MEM  |
| 2106                                | 048 | 0        | 2283 | 048 | 0        |
| 2107                                | 048 | 0        | 2284 | 057 | 9        |
| 2108                                | 052 | 4        | 2285 | 042 | x        |
| 2109                                | 049 | 1        | 2286 | 055 | 7        |
| 2110                                | 050 | 2        | 2287 | 055 | 7        |
| 2111                                | 052 | 4        | 2288 | 046 | .        |
| 2112                                | 057 | 9        | 2289 | 057 | 9        |
| 2113                                | 042 | x        | 2290 | 052 | 4        |
| 2114                                | 040 | (        | 2291 | 050 | 2        |
| 2115                                | 109 | RCL MEM  | 2292 | 043 | +        |
| 2116                                | 048 | 0        | 2293 | 109 | RCL MEM  |
| 2117                                | 057 | 9        | 2294 | 048 | 0        |
| 2118                                | 091 | Exponent | 2295 | 057 | 9        |
| 2119                                | 049 | 1        | 2296 | 091 | Exponent |
| 2120                                | 046 | .        | 2297 | 049 | 1        |
| 2121                                | 053 | 5        | 2298 | 046 | .        |
| 2122                                | 041 | )        | 2299 | 053 | 5        |
| 2123                                | 041 | )        | 2300 | 042 | x        |
| 2124                                | 041 | )        | 2301 | 049 | 1        |
| Print pKs calcite                   |     |          | 2302 | 046 | .        |
| 2165                                | 119 | print    | 2303 | 055 | 7        |
| 2166                                | 107 | STD MEM  | 2304 | 050 | 2        |
| 2167                                | 049 | 1        | 2305 | 056 | 8        |
| 2168                                | 054 | 6        | 2306 | 045 | -        |
| 2169                                | 111 | +/-      | 2307 | 109 | RCL MEM  |
| 2170                                | 064 | Inverse  | 2308 | 048 | 0        |
| 2171                                | 108 | LOG 10   | 2309 | 057 | 9        |
| Print Ks calcite solubility product |     |          | 2310 | 113 | Square   |
| 2212                                | 119 | print    | 2311 | 042 | x        |
| 2213                                | 107 | STD MEM  | 2312 | 048 | 0        |
| 2214                                | 049 | 1        | 2313 | 046 | .        |
| 2215                                | 055 | 7        | 2314 | 048 | 0        |
| Get lnKb boric acid                 |     |          | 2315 | 057 | 9        |
| 2256                                | 040 | (        | 2316 | 057 | 9        |
| 2257                                | 040 | (        | 2317 | 054 | 6        |
| 2258                                | 048 | 0        | 2318 | 041 | )        |

|      |     |         |                                   |     |         |
|------|-----|---------|-----------------------------------|-----|---------|
| 2319 | 047 | /       | 2379                              | 056 | 8       |
| 2320 | 109 | RCL MEM | 2380                              | 053 | 5       |
| 2321 | 048 | 0       | 2381                              | 043 | +       |
| 2322 | 055 | 7       | 2382                              | 109 | RCL MEM |
| 2323 | 043 | +       | 2383                              | 048 | 0       |
| 2324 | 049 | 1       | 2384                              | 057 | 9       |
| 2325 | 052 | 4       | 2385                              | 042 | x       |
| 2326 | 056 | 8       | 2386                              | 048 | 0       |
| 2327 | 046 | .       | 2387                              | 046 | .       |
| 2328 | 048 | 0       | 2388                              | 050 | 2       |
| 2329 | 050 | 2       | 2389                              | 052 | 4       |
| 2330 | 052 | 4       | 2390                              | 055 | 7       |
| 2331 | 056 | 8       | 2391                              | 052 | 4       |
| 2332 | 043 | +       | 2392                              | 041 | )       |
| 2333 | 109 | RCL MEM | 2393                              | 042 | x       |
| 2334 | 048 | 0       | 2394                              | 040 | (       |
| 2335 | 057 | 9       | 2395                              | 109 | RCL MEM |
| 2336 | 064 | Inverse | 2396                              | 048 | 0       |
| 2337 | 113 | Square  | 2397                              | 055 | 7       |
| 2338 | 042 | x       | 2398                              | 110 | LOG e   |
| 2339 | 049 | 1       | 2399                              | 041 | )       |
| 2340 | 051 | 3       | 2400                              | 043 | +       |
| 2341 | 055 | 7       | 2401                              | 109 | RCL MEM |
| 2342 | 046 | .       | 2402                              | 048 | 0       |
| 2343 | 049 | 1       | 2403                              | 055 | 7       |
| 2344 | 057 | 9       | 2404                              | 042 | x       |
| 2345 | 052 | 4       | 2405                              | 109 | RCL MEM |
| 2346 | 050 | 2       | 2406                              | 048 | 0       |
| 2347 | 043 | +       | 2407                              | 057 | 9       |
| 2348 | 109 | RCL MEM | 2408                              | 064 | Inverse |
| 2349 | 048 | 0       | 2409                              | 113 | Square  |
| 2350 | 057 | 9       | 2410                              | 042 | x       |
| 2351 | 042 | x       | 2411                              | 048 | 0       |
| 2352 | 049 | 1       | 2412                              | 046 | .       |
| 2353 | 046 | .       | 2413                              | 048 | 0       |
| 2354 | 054 | 6       | 2414                              | 053 | 5       |
| 2355 | 050 | 2       | 2415                              | 051 | 3       |
| 2356 | 049 | 1       | 2416                              | 049 | 1       |
| 2357 | 052 | 4       | 2417                              | 048 | 0       |
| 2358 | 050 | 2       | 2418                              | 053 | 5       |
| 2359 | 045 | -       | 2419                              | 041 | )       |
| 2360 | 040 | (       | Print lnkb                        |     |         |
| 2361 | 050 | 2       | 2460                              | 119 | print   |
| 2362 | 052 | 4       | 2461                              | 047 | /       |
| 2363 | 046 | .       | 2462                              | 049 | 1       |
| 2364 | 052 | 4       | 2463                              | 048 | 0       |
| 2365 | 051 | 3       | 2464                              | 110 | LOG e   |
| 2366 | 052 | 4       | 2465                              | 041 | )       |
| 2367 | 052 | 4       | 2466                              | 111 | +/-     |
| 2368 | 043 | +       | Print pkb                         |     |         |
| 2369 | 109 | RCL MEM | 2507                              | 119 | print   |
| 2370 | 048 | 0       | 2508                              | 107 | STD MEM |
| 2371 | 057 | 9       | 2509                              | 049 | 1       |
| 2372 | 064 | Inverse | 2510                              | 057 | 9       |
| 2373 | 113 | Square  | Get R= [HCO3-]/[CO2] lnlg(pH-pK1) |     |         |
| 2374 | 042 | x       | 2551                              | 040 | (       |
| 2375 | 050 | 2       | 2552                              | 109 | RCL MEM |
| 2376 | 053 | 5       | 2553                              | 048 | 0       |
| 2377 | 046 | .       | 2554                              | 051 | 3       |
| 2378 | 048 | 0       | 2555                              | 045 | -       |

```

2556 109 RCL MEM
2557 048 0
2558 052 4
2559 041 )
2560 119 print
2561 064 Inverse
2562 108 LOG 10
2563 119 print
2564 107 STO MEM
2565 049 1
2566 049 1
Get [C032-]/HC03-]=S
2607 040 (
2608 109 RCL MEM
2609 048 0
2610 051 3
2611 045 -
2612 109 RCL MEM
2613 048 0
2614 053 5
2615 041 )
2616 119 print
2617 064 Inverse
2618 108 LOG 10
Print S
2659 119 print
2660 107 STO MEM
2661 049 1
2662 050 2
Get B(OH)4-
2703 040 (
2704 040 (
2705 049 1
2706 043 +
2707 040 (
2708 040 (
2709 109 RCL MEM
2710 049 1
2711 057 9
2712 045 -
2713 109 RCL MEM
2714 048 0
2715 051 3
2716 041 )
2717 064 Inverse
2718 108 LOG 10
2719 041 )
2720 041 )
2721 114 1/x
2722 042 x
2723 109 RCL MEM
2724 056 8
2725 056 8
2726 041 )
Print B(OH)4-
2767 119 print
2768 107 STO MEM
2769 056 8
2770 055 7
2771 052 4

```

```

Get c from A and pH
c=A/([H+]/K2 +2)
2852 040 (
2853 109 RCL MEM
2854 048 0
2855 049 1
2856 047 /
2857 040 (
2858 040 (
2859 111 +/-
2860 109 RCL MEM
2861 048 0
2862 051 3
2863 111 +/-
2864 064 Inverse
2865 108 LOG 10
2866 047 /
2867 040 (
2868 109 RCL MEM
2869 048 0
2870 053 5
2871 111 +/-
2872 064 Inverse
2873 108 LOG 10
2874 041 )
2875 041 )
2876 043 +
2877 050 2
2878 041 )
2879 041 )
Print and stow c=[C032-]
2920 119 print
2921 107 STO MEM
2922 049 1
2923 053 5
Get b=[HC03-]=c[H+]/K2
2964 040 (
2965 040 (
2966 109 RCL MEM
2967 049 1
2968 053 5
2969 042 x
2970 040 (
2971 109 RCL MEM
2972 048 0
2973 051 3
2974 111 +/-
2975 064 Inverse
2976 108 LOG 10
2977 041 )
2978 041 )
2979 047 /
2980 040 (
2981 109 RCL MEM
2982 048 0
2983 053 5
2984 111 +/-
2985 064 Inverse
2986 108 LOG 10
2987 041 )

```

```

2988 041 )
Print and stow b
3029 119 print
3030 107 STO MEM
3031 049 1
3032 052 4
Get a=[CO2]=b[H+]/K1
3073 040 (
3074 040 (
3075 109 RCL MEM
3076 049 1
3077 052 4
3078 042 x
3079 040 (
3080 109 RCL MEM
3081 048 0
3082 051 3
3083 111 +/-
3084 064 Inverse
3085 108 LOG 10
3086 041 )
3087 041 )
3088 047 /
3089 040 (
3090 109 RCL MEM
3091 048 0
3092 052 4
3093 111 +/-
3094 064 Inverse
3095 108 LOG 10
3096 041 )
3097 041 )
Print and stow a
3138 119 print
3139 107 STO MEM
3140 049 1
3141 051 3
Get pCO2 atm
3182 040 (
3183 109 RCL MEM
3184 049 1
3185 051 3
3186 047 /
3187 109 RCL MEM
3188 048 0
3189 054 6
3190 041 )
Print and stow pCO2
3231 119 print
3232 107 STO MEM
3233 049 1
3234 056 8
Compute [CO2] from pCO2 and H
[CO2] = Ho'xZ
3315 040 (
3316 109 RCL MEM
3317 048 0
3318 054 6
3319 042 x
3320 109 RCL MEM

```

```

3321 049 1
3322 056 8
3323 041 )
Print [CO2] mmoles/kg
3364 119 print
3365 107 STO MEM
3366 049 1
3367 051 3
Compute [HCO3-] = [CO2]xR
3408 040 (
3409 109 RCL MEM
3410 049 1
3411 049 1
3412 042 x
3413 109 RCL MEM
3414 049 1
3415 051 3
3416 041 )
Print HCO3-
3457 119 print
3458 107 STO MEM
3459 049 1
3460 052 4
Compute CO32- = [HCO3-]xS
3501 040 (
3502 109 RCL MEM
3503 049 1
3504 050 2
3505 042 x
3506 109 RCL MEM
3507 049 1
3508 052 4
3509 041 )
Print [CO32-]
3550 119 print
3551 107 STO MEM
3552 049 1
3553 053 5
Get pH
3594 040 (
3595 040 (
3596 109 RCL MEM
3597 048 0
3598 052 4
3599 043 +
3600 040 (
3601 109 RCL MEM
3602 049 1
3603 052 4
3604 047 /
3605 109 RCL MEM
3606 049 1
3607 051 3
3608 041 )
3609 108 LOG 10
3610 041 )
3611 041 )
Print and stow pH
3652 119 print
3653 107 STO MEM

```

```

3654 048 0
3655 051 3
Get CaxCO32-
3696 040 (
3697 040 (
3698 049 1
3699 046 .
3700 057 9
3701 056 8
3702 101 EE
3703 051 3
3704 111 +/-
3705 042 x
3706 109 RCL MEM
3707 049 1
3708 053 5
3709 042 x
3710 049 1
3711 101 EE
3712 051 3
3713 111 +/-
3714 041 )
Print calcite product
3755 119 print
3756 047 /
3757 109 RCL MEM
3758 049 1
3759 055 7
3760 041 )
Print Omega
3801 119 print
Compute C=[CO2]+[HCO3-]+[CO32-]
3842 040 (
3843 109 RCL MEM
3844 049 1
3845 051 3
3846 043 +
3847 109 RCL MEM
3848 049 1
3849 052 4
3850 043 +
3851 109 RCL MEM
3852 049 1
3853 053 5
3854 041 )
Print total carbon C
3895 119 print
3896 107 STD MEM
3897 048 0
3898 056 8
Compute alkalinity including borate
3939 040 (
3940 109 RCL MEM
3941 049 1
3942 052 4
3943 043 +
3944 040 (
3945 050 2
3946 042 x
3947 109 RCL MEM

```

```

3948 049 1
3949 053 5
3950 041 )
3951 043 +
3952 109 RCL MEM
3953 056 8
3954 055 7
3955 043 +
3956 040 (
3957 109 RCL MEM
3958 048 0
3959 050 2
3960 111 +/-
3961 064 Inverse
3962 110 LOG e
Print Kw
4003 119 print
4004 114 1/x
4005 042 x
4006 040 (
4007 109 RCL MEM
4008 048 0
4009 052 4
4010 111 +/-
4011 064 Inverse
4012 108 LOG 10
4013 041 )
4014 041 )
4015 045 -
4016 040 (
4017 109 RCL MEM
4018 048 0
4019 052 4
4020 111 +/-
4021 064 Inverse
4022 108 LOG 10
4023 041 )
4024 041 )
Print alkalinity = Ac+Ab
4065 119 print
4066 107 STD MEM
4067 056 8
4068 051 3
Get new pCO2
4109 096 LABEL
4110 104 Hyperbol
4111 040 (
4112 109 RCL MEM
4113 057 9
4114 057 9
4115 043 +
4116 109 RCL MEM
4117 055 7
4118 056 8
4119 043 +
4120 109 RCL MEM
4121 049 1
4122 056 8
4123 041 )
Print and stow next pCO2

```

```

4164 119 print
4165 107 STO MEM
4166 049 1
4167 056 8
Get new A=[b+2c-U) Titrate strong acid
4208 040 (
4209 109 RCL MEM
4210 048 0
4211 049 1
4212 043 +
4213 109 RCL MEM
4214 056 8
4215 057 9
4216 041 )
4217 119 print
4218 107 STO MEM
4219 048 0
4220 049 1
Get next [CO2] = a using KH
4261 040 (
4262 109 RCL MEM
4263 048 0
4264 054 6
4265 042 x
4266 109 RCL MEM
4267 049 1
4268 056 8
4269 041 )
Print next [CO2] = a
4310 119 print
4311 107 STO MEM
4312 049 1
4313 051 3
Compute z=K2/(K1a)=c/b^2; b=HCO3-, c=CO3
Solve xb^2+b-y=0 equating c's
x=-b+- (b^2-4ac)^0.5/2a x=b
4434 040 (
4435 040 (
4436 109 RCL MEM
4437 048 0
4438 053 5
4439 111 +/-
4440 064 Inverse
4441 108 LOG 10
4442 041 )
4443 047 /
4444 040 (
4445 109 RCL MEM
4446 048 0
4447 052 4
4448 111 +/-
4449 064 Inverse
4450 108 LOG 10
4451 041 )
4452 041 )
4453 047 /
4454 109 RCL MEM
4455 049 1
4456 051 3
4457 041 )

```

```

Print z
4498 119 print
4499 107 STO MEM
4500 057 9
4501 056 8
Get Alkalinity change
4542 040 (
4543 109 RCL MEM
4544 049 1
4545 052 4
4546 043 +
4547 050 2
4548 042 x
4549 109 RCL MEM
4550 049 1
4551 053 5
4552 043 +
4553 109 RCL MEM
4554 056 8
4555 057 9
4556 041 )
4557 119 print
4558 107 STO MEM
4559 055 7
4560 057 9
Solve c=Zb^2=(Ac-b)/2
So 2Zb^2+b-A=0 to solve
4641 040 (
4642 040 (
4643 049 1
4644 043 +
4645 040 (
4646 056 8
4647 042 x
4648 109 RCL MEM
4649 057 9
4650 056 8
4651 042 x
4652 109 RCL MEM
4653 055 7
4654 057 9
4655 041 )
4656 041 )
4657 064 Inverse
4658 113 Square
4659 045 -
4660 049 1
4661 041 )
4662 047 /
4663 040 (
4664 052 4
4665 042 x
4666 109 RCL MEM
4667 057 9
4668 056 8
4669 041 )
4670 041 )
Print and stow b
4711 119 print
4712 107 STO MEM

```

|                         |     |         |  |
|-------------------------|-----|---------|--|
| 4713                    | 049 | 1       |  |
| 4714                    | 052 | 4       |  |
| Compute $y=C-a=b+c$     |     |         |  |
| 4755                    | 040 | (       |  |
| 4756                    | 109 | RCL MEM |  |
| 4757                    | 048 | 0       |  |
| 4758                    | 056 | 8       |  |
| 4759                    | 045 | -       |  |
| 4760                    | 109 | RCL MEM |  |
| 4761                    | 049 | 1       |  |
| 4762                    | 051 | 3       |  |
| 4763                    | 041 | )       |  |
| Print $y=b+c=C-a$       |     |         |  |
| 4804                    | 119 | print   |  |
| 4805                    | 107 | STO MEM |  |
| 4806                    | 057 | 9       |  |
| 4807                    | 055 | 7       |  |
| Compute pH              |     |         |  |
| 4848                    | 040 | (       |  |
| 4849                    | 040 | (       |  |
| 4850                    | 109 | RCL MEM |  |
| 4851                    | 048 | 0       |  |
| 4852                    | 052 | 4       |  |
| 4853                    | 043 | +       |  |
| 4854                    | 040 | (       |  |
| 4855                    | 109 | RCL MEM |  |
| 4856                    | 049 | 1       |  |
| 4857                    | 052 | 4       |  |
| 4858                    | 047 | /       |  |
| 4859                    | 109 | RCL MEM |  |
| 4860                    | 049 | 1       |  |
| 4861                    | 051 | 3       |  |
| 4862                    | 041 | )       |  |
| 4863                    | 108 | LOG 10  |  |
| 4864                    | 041 | )       |  |
| 4865                    | 041 | )       |  |
| Print and stow pH       |     |         |  |
| 4906                    | 119 | print   |  |
| 4907                    | 107 | STO MEM |  |
| 4908                    | 048 | 0       |  |
| 4909                    | 051 | 3       |  |
| Compute $c=[CO_3^{2-}]$ |     |         |  |
| 4950                    | 040 | (       |  |
| 4951                    | 109 | RCL MEM |  |
| 4952                    | 049 | 1       |  |
| 4953                    | 052 | 4       |  |
| 4954                    | 113 | Square  |  |
| 4955                    | 042 | x       |  |
| 4956                    | 109 | RCL MEM |  |
| 4957                    | 057 | 9       |  |
| 4958                    | 056 | 8       |  |
| 4959                    | 041 | )       |  |
| Print c                 |     |         |  |
| 5000                    | 119 | print   |  |
| 5001                    | 107 | STO MEM |  |
| 5002                    | 049 | 1       |  |
| 5003                    | 053 | 5       |  |
| Get new R               |     |         |  |
| 5044                    | 040 | (       |  |
| 5045                    | 109 | RCL MEM |  |
| 5046                    | 048 | 0       |  |
| 5047                    | 051 | 3       |  |
| 5048                    | 045 | -       |  |
| 5049                    | 109 | RCL MEM |  |
| 5050                    | 048 | 0       |  |
| 5051                    | 052 | 4       |  |
| 5052                    | 041 | )       |  |
| 5053                    | 119 | print   |  |
| 5054                    | 064 | Inverse |  |
| 5055                    | 108 | LOG 10  |  |
| 5056                    | 119 | print   |  |
| 5057                    | 107 | STO MEM |  |
| 5058                    | 049 | 1       |  |
| 5059                    | 049 | 1       |  |
| Get new $a = b/R$       |     |         |  |
| 5100                    | 040 | (       |  |
| 5101                    | 109 | RCL MEM |  |
| 5102                    | 049 | 1       |  |
| 5103                    | 052 | 4       |  |
| 5104                    | 047 | /       |  |
| 5105                    | 109 | RCL MEM |  |
| 5106                    | 049 | 1       |  |
| 5107                    | 049 | 1       |  |
| 5108                    | 041 | )       |  |
| 5109                    | 119 | print   |  |
| 5110                    | 107 | STO MEM |  |
| 5111                    | 049 | 1       |  |
| 5112                    | 051 | 3       |  |
| Get new $pCO_2$ atm     |     |         |  |
| 5153                    | 040 | (       |  |
| 5154                    | 109 | RCL MEM |  |
| 5155                    | 049 | 1       |  |
| 5156                    | 051 | 3       |  |
| 5157                    | 047 | /       |  |
| 5158                    | 109 | RCL MEM |  |
| 5159                    | 048 | 0       |  |
| 5160                    | 054 | 6       |  |
| 5161                    | 041 | )       |  |
| Print and stow $pCO_2$  |     |         |  |
| 5202                    | 119 | print   |  |
| 5203                    | 107 | STO MEM |  |
| 5204                    | 049 | 1       |  |
| 5205                    | 056 | 8       |  |
| Compute $C=a+b+c$       |     |         |  |
| 5246                    | 040 | (       |  |
| 5247                    | 109 | RCL MEM |  |
| 5248                    | 049 | 1       |  |
| 5249                    | 051 | 3       |  |
| 5250                    | 043 | +       |  |
| 5251                    | 109 | RCL MEM |  |
| 5252                    | 049 | 1       |  |
| 5253                    | 052 | 4       |  |
| 5254                    | 043 | +       |  |
| 5255                    | 109 | RCL MEM |  |
| 5256                    | 049 | 1       |  |
| 5257                    | 053 | 5       |  |
| 5258                    | 041 | )       |  |
| Print and stow C        |     |         |  |
| 5299                    | 119 | print   |  |
| 5300                    | 107 | STO MEM |  |

```

5301 048 0
5302 056 8
Compute A=b+2c
5343 040 (
5344 109 RCL MEM
5345 049 1
5346 052 4
5347 043 +
5348 040 (
5349 050 2
5350 042 x
5351 109 RCL MEM
5352 049 1
5353 053 5
5354 041 )
5355 041 )
Print alkalinity Ac
5396 119 print
5397 107 STO MEM
5398 048 0
5399 049 1
Compute and print Ac+Ab
Get B(OH)4-
5480 040 (
5481 109 RCL MEM
5482 056 8
5483 055 7
5484 107 STO MEM
5485 056 8
5486 054 6
5487 040 (
5488 049 1
5489 043 +
5490 040 (
5491 040 (
5492 109 RCL MEM
5493 049 1
5494 057 9
5495 045 -
5496 109 RCL MEM
5497 048 0
5498 051 3
5499 041 )
5500 064 Inverse
5501 108 LOG 10
5502 041 )
5503 041 )
5504 114 1/x
5505 042 x
5506 109 RCL MEM
5507 056 8
5508 056 8
5509 041 )
5510 119 print
5511 107 STO MEM
5512 056 8
5513 055 7
5514 041 )
5515 040 (
5516 109 RCL MEM

```

```

5517 056 8
5518 055 7
5519 045 -
5520 109 RCL MEM
5521 056 8
5522 054 6
5523 041 )
5524 117 SUM MEM
5525 056 8
5526 053 5
5527 109 RCL MEM
5528 056 8
5529 053 5
Print extra acid needed
5570 119 print
Get Ab
5611 040 (
5612 109 RCL MEM
5613 048 0
5614 049 1
5615 043 +
5616 109 RCL MEM
5617 056 8
5618 055 7
5619 041 )
5620 119 print
Get [Ca2+][CO32-] product
5661 040 (
5662 049 1
5663 046 .
5664 057 9
5665 056 8
5666 101 EE
5667 051 3
5668 111 +/-
5669 042 x
5670 109 RCL MEM
5671 049 1
5672 053 5
5673 042 x
5674 049 1
5675 101 EE
5676 051 3
5677 111 +/-
5678 041 )
5679 119 print
5680 107 STO MEM
5681 057 9
5682 054 6
5683 040 (
5684 109 RCL MEM
5685 057 9
5686 054 6
5687 047 /
5688 109 RCL MEM
5689 049 1
5690 055 7
5691 041 )
Print Omega solubility
5732 119 print

```

|      |     |     |     |
|------|-----|-----|-----|
| 5733 | 109 | RCL | MEM |
| 5734 | 048 | 0   |     |
| 5735 | 048 | 0   |     |

|      |     |          |      |
|------|-----|----------|------|
| 5736 | 039 | Dec      | JPNZ |
| 5737 | 104 | Hyperbol |      |
| 5738 | 002 | HALT     |      |

CO2TIT3/CAL TITRATE with HNO3 or CO2  
 28/10/20 pCO2 ex pH and Alkalinity  
 Inputs Iterations, Margins, Uacid, A,  
 Inputs PH, Kemperature, Salt  
 Computes pCO2 from A, pH and Kelvin  
 Varies H,K1,K2,Kw,Kc with T & salt S  
 $C=[CO_2+HCO_3^-+CO_3^{2-}]$  total C mmoles/kg  
 $A=[HCO_3^-+2CO_3^{2-}+OH^-+H^++B(OH)_4^-]$   
 Alkalinity label=Ac plus Ab borate  
 $167 \text{ moles CO}_2/\text{m}^2 \text{ dCO}_2=1=0.4175 \text{ m}/\text{m}^2$   
 I increments with M dpCO2 atm  
 To limit CO2 uptake, KawxX @ 1353  
 Omit M,T for dA; use U for dA  
 Check 5616 change 66600kg/atm  $2 \times 10^{-4}$   
 Iterations

|                                       |     |         |
|---------------------------------------|-----|---------|
| 0600                                  | 096 | LABEL   |
| 0601                                  | 073 | I       |
| 0602                                  | 107 | STO MEM |
| 0603                                  | 048 | 0       |
| 0604                                  | 048 | 0       |
| 0605                                  | 119 | print   |
| 0606                                  | 002 | HALT    |
| Margin, atm 0.000001 for d(pCO2)      |     |         |
| 0647                                  | 096 | LABEL   |
| 0648                                  | 077 | M       |
| 0649                                  | 107 | STO MEM |
| 0650                                  | 057 | 9       |
| 0651                                  | 057 | 9       |
| 0652                                  | 119 | print   |
| 0653                                  | 002 | HALT    |
| Input pCO2 trend 0.000001, 1 ppm      |     |         |
| 0694                                  | 096 | LABEL   |
| 0695                                  | 084 | T       |
| 0696                                  | 107 | STO MEM |
| 0697                                  | 055 | 7       |
| 0698                                  | 056 | 8       |
| 0699                                  | 119 | print   |
| 0700                                  | 002 | HALT    |
| Add strong acid mmoles/kg eg. -0.0033 |     |         |
| 0741                                  | 096 | LABEL   |
| 0742                                  | 085 | U       |
| 0743                                  | 107 | STO MEM |
| 0744                                  | 056 | 8       |
| 0745                                  | 057 | 9       |
| 0746                                  | 119 | print   |
| 0747                                  | 002 | HALT    |
| Ac = [a+2b]                           |     |         |
| 0788                                  | 096 | LABEL   |
| 0789                                  | 065 | A       |
| 0790                                  | 107 | STO MEM |
| 0791                                  | 048 | 0       |
| 0792                                  | 049 | 1       |
| 0793                                  | 119 | print   |
| 0794                                  | 002 | HALT    |
| Liming meq C, dA=2dC mmoles/kg        |     |         |
| 0835                                  | 096 | LABEL   |
| 0836                                  | 076 | L       |
| 0837                                  | 107 | STO MEM |
| 0838                                  | 054 | 6       |
| 0839                                  | 051 | 3       |

|                                            |     |         |
|--------------------------------------------|-----|---------|
| 0840                                       | 119 | print   |
| 0841                                       | 002 | HALT    |
| Label C[CO2+HCO3^-+CO3^{2-}] mmol/kg a+b+c |     |         |
| 0882                                       | 096 | LABEL   |
| 0883                                       | 067 | C       |
| 0884                                       | 107 | STO MEM |
| 0885                                       | 048 | 0       |
| 0886                                       | 056 | 8       |
| 0887                                       | 119 | print   |
| 0888                                       | 002 | HALT    |
| Input pH value                             |     |         |
| 0929                                       | 096 | LABEL   |
| 0930                                       | 080 | F       |
| 0931                                       | 107 | STO MEM |
| 0932                                       | 048 | 0       |
| 0933                                       | 051 | 3       |
| 0934                                       | 119 | print   |
| 0935                                       | 002 | HALT    |
| Label pK1'                                 |     |         |
| 0976                                       | 096 | LABEL   |
| 0977                                       | 078 | N       |
| 0978                                       | 107 | STO MEM |
| 0979                                       | 048 | 0       |
| 0980                                       | 052 | 4       |
| 0981                                       | 119 | print   |
| 0982                                       | 002 | HALT    |
| Label pK2'                                 |     |         |
| 1023                                       | 096 | LABEL   |
| 1024                                       | 079 | O       |
| 1025                                       | 107 | STO MEM |
| 1026                                       | 048 | 0       |
| 1027                                       | 053 | 5       |
| 1028                                       | 119 | print   |
| 1029                                       | 002 | HALT    |
| Label Henry's constant Ho                  |     |         |
| 1070                                       | 096 | LABEL   |
| 1071                                       | 072 | H       |
| 1072                                       | 107 | STO MEM |
| 1073                                       | 048 | 0       |
| 1074                                       | 054 | 6       |
| 1075                                       | 119 | print   |
| 1076                                       | 002 | HALT    |
| Input temperature K                        |     |         |
| 1117                                       | 096 | LABEL   |
| 1118                                       | 075 | K       |
| 1119                                       | 107 | STO MEM |
| 1120                                       | 053 | 5       |
| 1121                                       | 055 | 7       |
| 1122                                       | 119 | print   |
| 1123                                       | 002 | HALT    |
| Input salinity S ‰ g/kg                    |     |         |
| 1164                                       | 096 | LABEL   |
| 1165                                       | 083 | S       |
| 1166                                       | 107 | STO MEM |
| 1167                                       | 048 | 0       |
| 1168                                       | 057 | 9       |
| 1169                                       | 119 | print   |
| 1170                                       | 002 | HALT    |
| Input pCO2 atmospheres                     |     |         |
| 1211                                       | 096 | LABEL   |

|                                                |     |         |      |     |         |
|------------------------------------------------|-----|---------|------|-----|---------|
| Input pCO2 atmospheres                         |     |         | 1387 | 109 | RCL MEM |
| 1211                                           | 096 | LABEL   | 1388 | 048 | 0       |
| 1212                                           | 090 | Z       | 1389 | 055 | 7       |
| 1213                                           | 107 | STD MEM | 1390 | 041 | )       |
| 1214                                           | 049 | 1       | 1391 | 043 | +       |
| 1215                                           | 056 | 8       | 1392 | 040 | (       |
| 1216                                           | 119 | print   | 1393 | 109 | RCL MEM |
| 1217                                           | 002 | HALT    | 1394 | 048 | 0       |
| Execute                                        |     |         | 1395 | 055 | 7       |
| 1258                                           | 096 | LABEL   | 1396 | 042 | x       |
| 1259                                           | 088 | X       | 1397 | 049 | 1       |
| 1260                                           | 040 | (       | 1398 | 101 | EE      |
| 1261                                           | 109 | RCL MEM | 1399 | 050 | 2       |
| 1262                                           | 053 | 5       | 1400 | 111 | +/-     |
| 1263                                           | 055 | 7       | 1401 | 041 | )       |
| 1264                                           | 107 | STD MEM | 1402 | 110 | LOG e   |
| 1265                                           | 048 | 0       | 1403 | 042 | x       |
| 1266                                           | 055 | 7       | 1404 | 050 | 2       |
| Get Bt =total borates                          |     |         | 1405 | 051 | 3       |
| 1307                                           | 040 | (       | 1406 | 046 | .       |
| 1308                                           | 048 | 0       | 1407 | 051 | 3       |
| 1309                                           | 046 | .       | 1408 | 053 | 5       |
| 1310                                           | 052 | 4       | 1409 | 056 | 8       |
| 1311                                           | 049 | 1       | 1410 | 053 | 5       |
| 1312                                           | 054 | 6       | 1411 | 041 | )       |
| 1313                                           | 042 | x       | 1412 | 043 | +       |
| 1314                                           | 040 | (       | 1413 | 040 | (       |
| 1315                                           | 109 | RCL MEM | 1414 | 109 | RCL MEM |
| 1316                                           | 048 | 0       | 1415 | 048 | 0       |
| 1317                                           | 057 | 9       | 1416 | 057 | 9       |
| 1318                                           | 047 | /       | 1417 | 042 | x       |
| 1319                                           | 051 | 3       | 1418 | 040 | (       |
| 1320                                           | 053 | 5       | 1419 | 048 | 0       |
| 1321                                           | 041 | )       | 1420 | 046 | .       |
| 1322                                           | 041 | )       | 1421 | 048 | 0       |
| 1323                                           | 119 | print   | 1422 | 050 | 2       |
| 1324                                           | 107 | STD MEM | 1423 | 051 | 3       |
| 1325                                           | 056 | 8       | 1424 | 053 | 5       |
| 1326                                           | 056 | 8       | 1425 | 049 | 1       |
| Get pK <sub>o</sub> Henry's coefficient repCO2 |     |         | 1426 | 055 | 7       |
| 1367                                           | 040 | (       | 1427 | 045 | -       |
| 1368                                           | 048 | 0       | 1428 | 040 | (       |
| 1369                                           | 045 | -       | 1429 | 049 | 1       |
| 1370                                           | 054 | 6       | 1430 | 101 | EE      |
| 1371                                           | 048 | 0       | 1431 | 050 | 2       |
| 1372                                           | 046 | .       | 1432 | 111 | +/-     |
| 1373                                           | 050 | 2       | 1433 | 042 | x       |
| 1374                                           | 052 | 4       | 1434 | 109 | RCL MEM |
| 1375                                           | 048 | 0       | 1435 | 048 | 0       |
| 1376                                           | 057 | 9       | 1436 | 055 | 7       |
| 1377                                           | 043 | +       | 1437 | 041 | )       |
| 1378                                           | 040 | (       | 1438 | 042 | x       |
| 1379                                           | 057 | 9       | 1439 | 048 | 0       |
| 1380                                           | 051 | 3       | 1440 | 046 | .       |
| 1381                                           | 052 | 4       | 1441 | 048 | 0       |
| 1382                                           | 053 | 5       | 1442 | 050 | 2       |
| 1383                                           | 046 | .       | 1443 | 051 | 3       |
| 1384                                           | 049 | 1       | 1444 | 054 | 6       |
| 1385                                           | 055 | 7       | 1445 | 053 | 5       |
| 1386                                           | 047 | /       | 1446 | 054 | 6       |

|                                       |     |         |                      |     |         |
|---------------------------------------|-----|---------|----------------------|-----|---------|
| 1447                                  | 043 | +       | 1624                 | 046 | .       |
| 1448                                  | 040 | (       | 1625                 | 048 | 0       |
| 1449                                  | 049 | 1       | 1626                 | 048 | 0       |
| 1450                                  | 101 | EE      | 1627                 | 056 | 8       |
| 1451                                  | 050 | 2       | 1628                 | 043 | +       |
| 1452                                  | 111 | +/-     | 1629                 | 040 | (       |
| 1453                                  | 042 | x       | 1630                 | 109 | RCL MEM |
| 1454                                  | 109 | RCL MEM | 1631                 | 048 | 0       |
| 1455                                  | 048 | 0       | 1632                 | 055 | 7       |
| 1456                                  | 055 | 7       | 1633                 | 110 | LOG e   |
| 1457                                  | 041 | )       | 1634                 | 042 | x       |
| 1458                                  | 113 | Square  | 1635                 | 057 | 9       |
| 1459                                  | 042 | x       | 1636                 | 046 | .       |
| 1460                                  | 048 | 0       | 1637                 | 055 | 7       |
| 1461                                  | 046 | .       | 1638                 | 057 | 9       |
| 1462                                  | 048 | 0       | 1639                 | 052 | 4       |
| 1463                                  | 048 | 0       | 1640                 | 052 | 4       |
| 1464                                  | 052 | 4       | 1641                 | 041 | )       |
| 1465                                  | 055 | 7       | 1642                 | 045 | -       |
| 1466                                  | 048 | 0       | 1643                 | 040 | (       |
| 1467                                  | 051 | 3       | 1644                 | 048 | 0       |
| 1468                                  | 054 | 6       | 1645                 | 046 | .       |
| 1469                                  | 041 | )       | 1646                 | 048 | 0       |
| 1470                                  | 041 | )       | 1647                 | 049 | 1       |
| 1471                                  | 041 | )       | 1648                 | 049 | 1       |
| Print lnK'o function;give rate factor |     |         | 1649                 | 056 | 8       |
| 1512                                  | 119 | print   | 1650                 | 042 | x       |
| 1513                                  | 064 | Inverse | 1651                 | 109 | RCL MEM |
| 1514                                  | 110 | LOG e   | 1652                 | 048 | 0       |
| 1515                                  | 042 | x       | 1653                 | 057 | 9       |
| 1516                                  | 049 | 1       | 1654                 | 041 | )       |
| 1517                                  | 101 | EE      | 1655                 | 043 | +       |
| 1518                                  | 051 | 3       | 1656                 | 040 | (       |
| 1519                                  | 042 | x       | 1657                 | 109 | RCL MEM |
| 1520                                  | 049 | 1       | 1658                 | 048 | 0       |
| 1521                                  | 046 | .       | 1659                 | 057 | 9       |
| 1522                                  | 048 | 0       | 1660                 | 113 | Square  |
| 1523                                  | 048 | 0       | 1661                 | 042 | x       |
| Print Kaw mM, stow m06                |     |         | 1662                 | 048 | 0       |
| 1564                                  | 061 | =       | 1663                 | 046 | .       |
| 1565                                  | 119 | print   | 1664                 | 048 | 0       |
| 1566                                  | 107 | STD MEM | 1665                 | 048 | 0       |
| 1567                                  | 048 | 0       | 1666                 | 048 | 0       |
| 1568                                  | 054 | 6       | 1667                 | 049 | 1       |
| Get pk1'                              |     |         | 1668                 | 049 | 1       |
| 1609                                  | 040 | (       | 1669                 | 054 | 6       |
| 1610                                  | 040 | (       | 1670                 | 041 | )       |
| 1611                                  | 051 | 3       | 1671                 | 041 | )       |
| 1612                                  | 054 | 6       | Print pk1', stow m04 |     |         |
| 1613                                  | 055 | 7       | 1712                 | 119 | print   |
| 1614                                  | 048 | 0       | 1713                 | 107 | STD MEM |
| 1615                                  | 046 | .       | 1714                 | 048 | 0       |
| 1616                                  | 055 | 7       | 1715                 | 052 | 4       |
| 1617                                  | 047 | /       | Get pk2'             |     |         |
| 1618                                  | 109 | RCL MEM | 1756                 | 040 | (       |
| 1619                                  | 048 | 0       | 1757                 | 040 | (       |
| 1620                                  | 055 | 7       | 1758                 | 049 | 1       |
| 1621                                  | 045 | -       | 1759                 | 051 | 3       |
| 1622                                  | 054 | 6       | 1760                 | 057 | 9       |
| 1623                                  | 050 | 2       | 1761                 | 052 | 4       |

|                             |     |         |      |     |         |
|-----------------------------|-----|---------|------|-----|---------|
| 1762                        | 046 | .       | 1900 | 051 | 3       |
| 1763                        | 055 | 7       | 1901 | 056 | 8       |
| 1764                        | 047 | /       | 1902 | 052 | 4       |
| 1765                        | 109 | RCL MEM | 1903 | 055 | 7       |
| 1766                        | 048 | 0       | 1904 | 046 | .       |
| 1767                        | 055 | 7       | 1905 | 050 | 2       |
| 1768                        | 041 | )       | 1906 | 054 | 6       |
| 1769                        | 043 | +       | 1907 | 047 | /       |
| 1770                        | 052 | 4       | 1908 | 109 | RCL MEM |
| 1771                        | 046 | .       | 1909 | 048 | 0       |
| 1772                        | 055 | 7       | 1910 | 055 | 7       |
| 1773                        | 055 | 7       | 1911 | 041 | )       |
| 1774                        | 055 | 7       | 1912 | 045 | -       |
| 1775                        | 045 | -       | 1913 | 040 | (       |
| 1776                        | 048 | 0       | 1914 | 109 | RCL MEM |
| 1777                        | 046 | .       | 1915 | 048 | 0       |
| 1778                        | 048 | 0       | 1916 | 055 | 7       |
| 1779                        | 049 | 1       | 1917 | 110 | LOG e   |
| 1780                        | 056 | 8       | 1918 | 042 | x       |
| 1781                        | 052 | 4       | 1919 | 050 | 2       |
| 1782                        | 042 | x       | 1920 | 051 | 3       |
| 1783                        | 109 | RCL MEM | 1921 | 046 | .       |
| 1784                        | 048 | 0       | 1922 | 054 | 6       |
| 1785                        | 057 | 9       | 1923 | 053 | 5       |
| 1786                        | 043 | +       | 1924 | 050 | 2       |
| 1787                        | 040 | (       | 1925 | 049 | 1       |
| 1788                        | 109 | RCL MEM | 1926 | 041 | )       |
| 1789                        | 048 | 0       | 1927 | 043 | +       |
| 1790                        | 057 | 9       | 1928 | 040 | (       |
| 1791                        | 113 | Square  | 1929 | 040 | (       |
| 1792                        | 042 | x       | 1930 | 040 | (       |
| 1793                        | 048 | 0       | 1931 | 049 | 1       |
| 1794                        | 046 | .       | 1932 | 049 | 1       |
| 1795                        | 048 | 0       | 1933 | 056 | 8       |
| 1796                        | 048 | 0       | 1934 | 046 | .       |
| 1797                        | 048 | 0       | 1935 | 054 | 6       |
| 1798                        | 049 | 1       | 1936 | 055 | 7       |
| 1799                        | 049 | 1       | 1937 | 047 | /       |
| 1800                        | 056 | 8       | 1938 | 109 | RCL MEM |
| 1801                        | 041 | )       | 1939 | 048 | 0       |
| 1802                        | 041 | )       | 1940 | 055 | 7       |
| Print pk2', stow m05        |     |         | 1941 | 041 | )       |
| 1843                        | 119 | print   | 1942 | 045 | -       |
| 1844                        | 107 | STD MEM | 1943 | 053 | 5       |
| 1845                        | 048 | 0       | 1944 | 046 | .       |
| 1846                        | 053 | 5       | 1945 | 057 | 9       |
| Get water dissociation lnKw |     |         | 1946 | 055 | 7       |
| 1887                        | 040 | (       | 1947 | 055 | 7       |
| 1888                        | 049 | 1       | 1948 | 043 | +       |
| 1889                        | 052 | 4       | 1949 | 040 | (       |
| 1890                        | 056 | 8       | 1950 | 109 | RCL MEM |
| 1891                        | 046 | .       | 1951 | 048 | 0       |
| 1892                        | 057 | 9       | 1952 | 055 | 7       |
| 1893                        | 054 | 6       | 1953 | 110 | LOG e   |
| 1894                        | 053 | 5       | 1954 | 042 | x       |
| 1895                        | 048 | 0       | 1955 | 049 | 1       |
| 1896                        | 050 | 2       | 1956 | 046 | .       |
| 1897                        | 045 | -       | 1957 | 048 | 0       |
| 1898                        | 040 | (       | 1958 | 052 | 4       |
| 1899                        | 049 | 1       | 1959 | 057 | 9       |

|                                        |     |         |      |     |         |
|----------------------------------------|-----|---------|------|-----|---------|
| 1960                                   | 053 | 5       | 2137 | 041 | )       |
| 1961                                   | 041 | )       | 2138 | 045 | -       |
| 1962                                   | 041 | )       | 2139 | 040 | (       |
| 1963                                   | 042 | x       | 2140 | 050 | 2       |
| 1964                                   | 109 | RCL MEM | 2141 | 056 | 8       |
| 1965                                   | 048 | 0       | 2142 | 051 | 3       |
| 1966                                   | 057 | 9       | 2143 | 057 | 9       |
| 1967                                   | 064 | Inverse | 2144 | 046 | .       |
| 1968                                   | 113 | Square  | 2145 | 051 | 3       |
| 1969                                   | 041 | )       | 2146 | 049 | 1       |
| 1970                                   | 041 | )       | 2147 | 057 | 9       |
| 1971                                   | 045 | -       | 2148 | 047 | /       |
| 1972                                   | 048 | 0       | 2149 | 109 | RCL MEM |
| 1973                                   | 046 | .       | 2150 | 048 | 0       |
| 1974                                   | 048 | 0       | 2151 | 055 | 7       |
| 1975                                   | 049 | 1       | 2152 | 041 | )       |
| 1976                                   | 054 | 6       | 2153 | 045 | -       |
| 1977                                   | 049 | 1       | 2154 | 040 | (       |
| 1978                                   | 053 | 5       | 2155 | 109 | RCL MEM |
| 1979                                   | 042 | x       | 2156 | 048 | 0       |
| 1980                                   | 109 | RCL MEM | 2157 | 055 | 7       |
| 1981                                   | 048 | 0       | 2158 | 108 | LOG 10  |
| 1982                                   | 057 | 9       | 2159 | 042 | x       |
| 1983                                   | 041 | )       | 2160 | 055 | 7       |
| Print lnKw, stow m02                   |     |         | 2161 | 049 | 1       |
| 2024                                   | 119 | print   | 2162 | 046 | .       |
| 2025                                   | 107 | STD MEM | 2163 | 053 | 5       |
| 2026                                   | 048 | 0       | 2164 | 057 | 9       |
| 2027                                   | 050 | 2       | 2165 | 053 | 5       |
| 2028                                   | 064 | Inverse | 2166 | 041 | )       |
| 2029                                   | 110 | LOG e   | 2167 | 043 | +       |
| Print Kw                               |     |         | 2168 | 040 | (       |
| 2070                                   | 119 | print   | 2169 | 048 | 0       |
| 2071                                   | 107 | STD MEM | 2170 | 046 | .       |
| 2072                                   | 054 | 6       | 2171 | 055 | 7       |
| 2073                                   | 049 | 1       | 2172 | 055 | 7       |
| Get calcite pKs for solubility product |     |         | 2173 | 055 | 7       |
| 2114                                   | 040 | (       | 2174 | 049 | 1       |
| 2115                                   | 049 | 1       | 2175 | 050 | 2       |
| 2116                                   | 055 | 7       | 2176 | 045 | -       |
| 2117                                   | 049 | 1       | 2177 | 040 | (       |
| 2118                                   | 046 | .       | 2178 | 048 | 0       |
| 2119                                   | 057 | 9       | 2179 | 046 | .       |
| 2120                                   | 048 | 0       | 2180 | 048 | 0       |
| 2121                                   | 054 | 6       | 2181 | 048 | 0       |
| 2122                                   | 053 | 5       | 2182 | 050 | 2       |
| 2123                                   | 043 | +       | 2183 | 056 | 8       |
| 2124                                   | 040 | (       | 2184 | 052 | 4       |
| 2125                                   | 048 | 0       | 2185 | 050 | 2       |
| 2126                                   | 046 | .       | 2186 | 054 | 6       |
| 2127                                   | 048 | 0       | 2187 | 042 | x       |
| 2128                                   | 055 | 7       | 2188 | 109 | RCL MEM |
| 2129                                   | 055 | 7       | 2189 | 048 | 0       |
| 2130                                   | 057 | 9       | 2190 | 055 | 7       |
| 2131                                   | 057 | 9       | 2191 | 041 | )       |
| 2132                                   | 051 | 3       | 2192 | 045 | -       |
| 2133                                   | 042 | x       | 2193 | 040 | (       |
| 2134                                   | 109 | RCL MEM | 2194 | 049 | 1       |
| 2135                                   | 048 | 0       | 2195 | 055 | 7       |
| 2136                                   | 055 | 7       | 2196 | 056 | 8       |

|      |     |                             |      |     |                                        |
|------|-----|-----------------------------|------|-----|----------------------------------------|
| 2197 | 046 | .                           | 2296 | 111 | +/-                                    |
| 2198 | 051 | 3                           | 2297 | 064 | Inverse                                |
| 2199 | 052 | 4                           | 2298 | 108 | LOG 10                                 |
| 2200 | 047 | /                           |      |     | Print Ks calcite sol. product, sto m17 |
| 2201 | 109 | RCL MEM                     | 2339 | 119 | print                                  |
| 2202 | 048 | 0                           | 2340 | 107 | STO MEM                                |
| 2203 | 055 | 7                           | 2341 | 049 | 1                                      |
| 2204 | 041 | )                           | 2342 | 055 | 7                                      |
| 2205 | 041 | )                           |      |     | Get lnKb boric acid                    |
| 2206 | 042 | x                           | 2383 | 040 | (                                      |
| 2207 | 040 | (                           | 2384 | 040 | (                                      |
| 2208 | 109 | RCL MEM                     | 2385 | 048 | 0                                      |
| 2209 | 048 | 0                           | 2386 | 045 | -                                      |
| 2210 | 057 | 9                           | 2387 | 056 | 8                                      |
| 2211 | 064 | Inverse                     | 2388 | 057 | 9                                      |
| 2212 | 113 | Square                      | 2389 | 054 | 6                                      |
| 2213 | 041 | )                           | 2390 | 054 | 6                                      |
| 2214 | 041 | )                           | 2391 | 046 | .                                      |
| 2215 | 043 | +                           | 2392 | 057 | 9                                      |
| 2216 | 040 | (                           | 2393 | 048 | 0                                      |
| 2217 | 048 | 0                           | 2394 | 045 | -                                      |
| 2218 | 046 | .                           | 2395 | 109 | RCL MEM                                |
| 2219 | 048 | 0                           | 2396 | 048 | 0                                      |
| 2220 | 055 | 7                           | 2397 | 057 | 9                                      |
| 2221 | 055 | 7                           | 2398 | 064 | Inverse                                |
| 2222 | 049 | 1                           | 2399 | 113 | Square                                 |
| 2223 | 049 | 1                           | 2400 | 042 | x                                      |
| 2224 | 042 | x                           | 2401 | 050 | 2                                      |
| 2225 | 109 | RCL MEM                     | 2402 | 056 | 8                                      |
| 2226 | 048 | 0                           | 2403 | 057 | 9                                      |
| 2227 | 057 | 9                           | 2404 | 048 | 0                                      |
| 2228 | 041 | )                           | 2405 | 046 | .                                      |
| 2229 | 045 | -                           | 2406 | 053 | 5                                      |
| 2230 | 040 | (                           | 2407 | 051 | 3                                      |
| 2231 | 048 | 0                           | 2408 | 045 | -                                      |
| 2232 | 046 | .                           | 2409 | 109 | RCL MEM                                |
| 2233 | 048 | 0                           | 2410 | 048 | 0                                      |
| 2234 | 048 | 0                           | 2411 | 057 | 9                                      |
| 2235 | 052 | 4                           | 2412 | 042 | x                                      |
| 2236 | 049 | 1                           | 2413 | 055 | 7                                      |
| 2237 | 050 | 2                           | 2414 | 055 | 7                                      |
| 2238 | 052 | 4                           | 2415 | 046 | .                                      |
| 2239 | 057 | 9                           | 2416 | 057 | 9                                      |
| 2240 | 042 | x                           | 2417 | 052 | 4                                      |
| 2241 | 040 | (                           | 2418 | 050 | 2                                      |
| 2242 | 109 | RCL MEM                     | 2419 | 043 | +                                      |
| 2243 | 048 | 0                           | 2420 | 109 | RCL MEM                                |
| 2244 | 057 | 9                           | 2421 | 048 | 0                                      |
| 2245 | 091 | Exponent                    | 2422 | 057 | 9                                      |
| 2246 | 049 | 1                           | 2423 | 091 | Exponent                               |
| 2247 | 046 | .                           | 2424 | 049 | 1                                      |
| 2248 | 053 | 5                           | 2425 | 046 | .                                      |
| 2249 | 041 | )                           | 2426 | 053 | 5                                      |
| 2250 | 041 | )                           | 2427 | 042 | x                                      |
| 2251 | 041 | )                           | 2428 | 049 | 1                                      |
|      |     | Print pKs calcite, stow m16 | 2429 | 046 | .                                      |
| 2292 | 119 | print                       | 2430 | 055 | 7                                      |
| 2293 | 107 | STO MEM                     | 2431 | 050 | 2                                      |
| 2294 | 049 | 1                           | 2432 | 056 | 8                                      |
| 2295 | 054 | 6                           | 2433 | 045 | -                                      |

|      |     |         |                      |     |         |
|------|-----|---------|----------------------|-----|---------|
| 2434 | 109 | RCL MEM | 2494                 | 052 | 4       |
| 2435 | 048 | 0       | 2495                 | 043 | +       |
| 2436 | 057 | 9       | 2496                 | 109 | RCL MEM |
| 2437 | 113 | Square  | 2497                 | 048 | 0       |
| 2438 | 042 | x       | 2498                 | 057 | 9       |
| 2439 | 048 | 0       | 2499                 | 064 | Inverse |
| 2440 | 046 | .       | 2500                 | 113 | Square  |
| 2441 | 048 | 0       | 2501                 | 042 | x       |
| 2442 | 057 | 9       | 2502                 | 050 | 2       |
| 2443 | 057 | 9       | 2503                 | 053 | 5       |
| 2444 | 054 | 6       | 2504                 | 046 | .       |
| 2445 | 041 | )       | 2505                 | 048 | 0       |
| 2446 | 047 | /       | 2506                 | 056 | 8       |
| 2447 | 109 | RCL MEM | 2507                 | 053 | 5       |
| 2448 | 048 | 0       | 2508                 | 043 | +       |
| 2449 | 055 | 7       | 2509                 | 109 | RCL MEM |
| 2450 | 043 | +       | 2510                 | 048 | 0       |
| 2451 | 049 | 1       | 2511                 | 057 | 9       |
| 2452 | 052 | 4       | 2512                 | 042 | x       |
| 2453 | 056 | 8       | 2513                 | 048 | 0       |
| 2454 | 046 | .       | 2514                 | 046 | .       |
| 2455 | 048 | 0       | 2515                 | 050 | 2       |
| 2456 | 050 | 2       | 2516                 | 052 | 4       |
| 2457 | 052 | 4       | 2517                 | 055 | 7       |
| 2458 | 056 | 8       | 2518                 | 052 | 4       |
| 2459 | 043 | +       | 2519                 | 041 | )       |
| 2460 | 109 | RCL MEM | 2520                 | 042 | x       |
| 2461 | 048 | 0       | 2521                 | 040 | (       |
| 2462 | 057 | 9       | 2522                 | 109 | RCL MEM |
| 2463 | 064 | Inverse | 2523                 | 048 | 0       |
| 2464 | 113 | Square  | 2524                 | 055 | 7       |
| 2465 | 042 | x       | 2525                 | 110 | LOG e   |
| 2466 | 049 | 1       | 2526                 | 041 | )       |
| 2467 | 051 | 3       | 2527                 | 043 | +       |
| 2468 | 055 | 7       | 2528                 | 109 | RCL MEM |
| 2469 | 046 | .       | 2529                 | 048 | 0       |
| 2470 | 049 | 1       | 2530                 | 055 | 7       |
| 2471 | 057 | 9       | 2531                 | 042 | x       |
| 2472 | 052 | 4       | 2532                 | 109 | RCL MEM |
| 2473 | 050 | 2       | 2533                 | 048 | 0       |
| 2474 | 043 | +       | 2534                 | 057 | 9       |
| 2475 | 109 | RCL MEM | 2535                 | 064 | Inverse |
| 2476 | 048 | 0       | 2536                 | 113 | Square  |
| 2477 | 057 | 9       | 2537                 | 042 | x       |
| 2478 | 042 | x       | 2538                 | 048 | 0       |
| 2479 | 049 | 1       | 2539                 | 046 | .       |
| 2480 | 046 | .       | 2540                 | 048 | 0       |
| 2481 | 054 | 6       | 2541                 | 053 | 5       |
| 2482 | 050 | 2       | 2542                 | 051 | 3       |
| 2483 | 049 | 1       | 2543                 | 049 | 1       |
| 2484 | 052 | 4       | 2544                 | 048 | 0       |
| 2485 | 050 | 2       | 2545                 | 053 | 5       |
| 2486 | 045 | -       | 2546                 | 041 | )       |
| 2487 | 040 | (       | Print Inkb, stow m19 |     |         |
| 2488 | 050 | 2       | 2587                 | 119 | print   |
| 2489 | 052 | 4       | 2588                 | 047 | /       |
| 2490 | 046 | .       | 2589                 | 049 | 1       |
| 2491 | 052 | 4       | 2590                 | 048 | 0       |
| 2492 | 051 | 3       | 2591                 | 110 | LOG e   |
| 2493 | 052 | 4       | 2592                 | 041 | )       |

```

2593 111 +/-
Print pKb, stow m19
2634 119 print
2635 107 STO MEM
2636 049 1
2637 057 9
Get R= [HCO3-]/[CO2] Inlg(pH-pK1)
2678 040 (
2679 109 RCL MEM
2680 048 0
2681 051 3
2682 045 -
2683 109 RCL MEM
2684 048 0
2685 052 4
2686 041 )
2687 119 print
2688 064 Inverse
2689 108 LOG 10
Print R, stow m11
2730 119 print
2731 107 STO MEM
2732 049 1
2733 049 1
Get [CO32-]/HCO3-]=S
2774 040 (
2775 109 RCL MEM
2776 048 0
2777 051 3
2778 045 -
2779 109 RCL MEM
2780 048 0
2781 053 5
2782 041 )
Print S, stow m12
2823 119 print
2824 064 Inverse
2825 108 LOG 10
Print S
2866 119 print
2867 107 STO MEM
2868 049 1
2869 050 2
Get B(OH)4-
2910 040 (
2911 040 (
2912 049 1
2913 043 +
2914 040 (
2915 040 (
2916 109 RCL MEM
2917 049 1
2918 057 9
2919 045 -
2920 109 RCL MEM
2921 048 0
2922 051 3
2923 041 )
2924 064 Inverse
2925 108 LOG 10

```

```

2926 041 )
2927 041 )
2928 114 1/x
2929 042 x
2930 109 RCL MEM
2931 056 8
2932 056 8
2933 041 )
Print B(OH)4-, stow m87
2974 119 print
2975 107 STO MEM
2976 056 8
2977 055 7
Get c from A and pH
c=A/([H+]/K2 +2)
3058 040 (
3059 109 RCL MEM
3060 048 0
3061 049 1
3062 047 /
3063 040 (
3064 040 (
3065 111 +/-
3066 109 RCL MEM
3067 048 0
3068 051 3
3069 111 +/-
3070 064 Inverse
3071 108 LOG 10
3072 047 /
3073 040 (
3074 109 RCL MEM
3075 048 0
3076 053 5
3077 111 +/-
3078 064 Inverse
3079 108 LOG 10
3080 041 )
3081 041 )
3082 043 +
3083 050 2
3084 041 )
3085 041 )
Print [CO32-]=c, stow m15
3126 119 print
3127 107 STO MEM
3128 049 1
3129 053 5
Get b=[HCO3-]=c[H+]/K2
3170 040 (
3171 040 (
3172 109 RCL MEM
3173 049 1
3174 053 5
3175 042 x
3176 040 (
3177 109 RCL MEM
3178 048 0
3179 051 3
3180 111 +/-

```

|                       |     |         |                                 |     |         |
|-----------------------|-----|---------|---------------------------------|-----|---------|
| 3183                  | 041 | )       | 3438                            | 107 | STO MEM |
| 3184                  | 041 | )       | 3439                            | 049 | 1       |
| 3185                  | 047 | /       | 3440                            | 056 | 8       |
| 3186                  | 040 | (       | Compute [CO2] from pCO2 and Kaw |     |         |
| 3187                  | 109 | RCL MEM | [CO2] = KawxZ                   |     |         |
| 3188                  | 048 | 0       | 3521                            | 040 | (       |
| 3189                  | 053 | 5       | 3522                            | 109 | RCL MEM |
| 3190                  | 111 | +/-     | 3523                            | 048 | 0       |
| 3191                  | 064 | Inverse | 3524                            | 054 | 6       |
| 3192                  | 108 | LOG 10  | 3525                            | 042 | x       |
| 3193                  | 041 | )       | 3526                            | 109 | RCL MEM |
| 3194                  | 041 | )       | 3527                            | 049 | 1       |
| Print and stow b, m14 |     |         | 3528                            | 056 | 8       |
| 3235                  | 119 | print   | 3529                            | 041 | )       |
| 3236                  | 107 | STO MEM | Print [CO2] mmol/kg             |     |         |
| 3237                  | 049 | 1       | 3570                            | 119 | print   |
| 3238                  | 052 | 4       | 3571                            | 107 | STO MEM |
| Get a=[CO2]=b[H+]/K1  |     |         | 3572                            | 049 | 1       |
| 3279                  | 040 | (       | 3573                            | 051 | 3       |
| 3280                  | 040 | (       | Compute [HCO3-] = [CO2]xR       |     |         |
| 3281                  | 109 | RCL MEM | 3614                            | 040 | (       |
| 3282                  | 049 | 1       | 3615                            | 109 | RCL MEM |
| 3283                  | 052 | 4       | 3616                            | 049 | 1       |
| 3284                  | 042 | x       | 3617                            | 049 | 1       |
| 3285                  | 040 | (       | 3618                            | 042 | x       |
| 3286                  | 109 | RCL MEM | 3619                            | 109 | RCL MEM |
| 3287                  | 048 | 0       | 3620                            | 049 | 1       |
| 3288                  | 051 | 3       | 3621                            | 051 | 3       |
| 3289                  | 111 | +/-     | 3622                            | 041 | )       |
| 3290                  | 064 | Inverse | Print HCO3- = b                 |     |         |
| 3291                  | 108 | LOG 10  | 3663                            | 119 | print   |
| 3292                  | 041 | )       | 3664                            | 107 | STO MEM |
| 3293                  | 041 | )       | 3665                            | 049 | 1       |
| 3294                  | 047 | /       | 3666                            | 052 | 4       |
| 3295                  | 040 | (       | Compute CO32- = [HCO3-]xS       |     |         |
| 3296                  | 109 | RCL MEM | 3707                            | 040 | (       |
| 3297                  | 048 | 0       | 3708                            | 109 | RCL MEM |
| 3298                  | 052 | 4       | 3709                            | 049 | 1       |
| 3299                  | 111 | +/-     | 3710                            | 050 | 2       |
| 3300                  | 064 | Inverse | 3711                            | 042 | x       |
| 3301                  | 108 | LOG 10  | 3712                            | 109 | RCL MEM |
| 3302                  | 041 | )       | 3713                            | 049 | 1       |
| 3303                  | 041 | )       | 3714                            | 052 | 4       |
| Print and stow a, m13 |     |         | 3715                            | 041 | )       |
| 3344                  | 119 | print   | Print [CO32-]                   |     |         |
| 3345                  | 107 | STO MEM | 3756                            | 119 | print   |
| 3346                  | 049 | 1       | 3757                            | 107 | STO MEM |
| 3347                  | 051 | 3       | 3758                            | 049 | 1       |
| Get pCO2 atm          |     |         | 3759                            | 053 | 5       |
| 3388                  | 040 | (       | Get pH                          |     |         |
| 3389                  | 109 | RCL MEM | 3800                            | 040 | (       |
| 3390                  | 049 | 1       | 3801                            | 040 | (       |
| 3391                  | 051 | 3       | 3802                            | 109 | RCL MEM |
| 3392                  | 047 | /       | 3803                            | 048 | 0       |
| 3393                  | 109 | RCL MEM | 3804                            | 052 | 4       |
| 3394                  | 048 | 0       | 3805                            | 043 | +       |
| 3395                  | 054 | 6       | 3806                            | 040 | (       |
| 3396                  | 041 | )       | 3807                            | 109 | RCL MEM |
| Print and stow pCO2   |     |         | 3808                            | 049 | 1       |
| 3437                  | 119 | print   | 3809                            | 052 | 4       |

|                                 |         |         |  |                                    |            |                  |
|---------------------------------|---------|---------|--|------------------------------------|------------|------------------|
| 3808                            | 049     | 1       |  | 4102                               | 107        | STO MEM          |
| 3809                            | 052     | 4       |  | 4103                               | 048        | 0                |
| 3810                            | 047     | /       |  | 4104                               | 056        | 8                |
| 3811                            | 109     | RCL MEM |  | Compute                            | alkalinity | including borate |
| 3812                            | 049     | 1       |  | 4145                               | 040        | (                |
| 3813                            | 051     | 3       |  | 4146                               | 109        | RCL MEM          |
| 3814                            | 041     | )       |  | 4147                               | 049        | 1                |
| 3815                            | 108     | LOG 10  |  | 4148                               | 052        | 4                |
| 3816                            | 041     | )       |  | 4149                               | 043        | +                |
| 3817                            | 041     | )       |  | 4150                               | 040        | (                |
| Print and stow                  | pH, m03 |         |  | 4151                               | 050        | 2                |
| 3858                            | 119     | print   |  | 4152                               | 042        | x                |
| 3859                            | 107     | STO MEM |  | 4153                               | 109        | RCL MEM          |
| 3860                            | 048     | 0       |  | 4154                               | 049        | 1                |
| 3861                            | 051     | 3       |  | 4155                               | 053        | 5                |
| Get CaxCO32-                    |         |         |  | 4156                               | 041        | )                |
| 3902                            | 040     | (       |  | 4157                               | 043        | +                |
| 3903                            | 040     | (       |  | 4158                               | 109        | RCL MEM          |
| 3904                            | 049     | 1       |  | 4159                               | 056        | 8                |
| 3905                            | 046     | .       |  | 4160                               | 055        | 7                |
| 3906                            | 057     | 9       |  | 4161                               | 043        | +                |
| 3907                            | 056     | 8       |  | 4162                               | 040        | (                |
| 3908                            | 101     | EE      |  | 4163                               | 109        | RCL MEM          |
| 3909                            | 051     | 3       |  | 4164                               | 048        | 0                |
| 3910                            | 111     | +/-     |  | 4165                               | 050        | 2                |
| 3911                            | 042     | x       |  | 4166                               | 111        | +/-              |
| 3912                            | 109     | RCL MEM |  | 4167                               | 064        | Inverse          |
| 3913                            | 049     | 1       |  | 4168                               | 110        | LOG e            |
| 3914                            | 053     | 5       |  | Print Kw                           |            |                  |
| 3915                            | 042     | x       |  | 4209                               | 119        | print            |
| 3916                            | 049     | 1       |  | 4210                               | 114        | 1/x              |
| 3917                            | 101     | EE      |  | 4211                               | 042        | x                |
| 3918                            | 051     | 3       |  | 4212                               | 040        | (                |
| 3919                            | 111     | +/-     |  | 4213                               | 109        | RCL MEM          |
| 3920                            | 041     | )       |  | 4214                               | 048        | 0                |
| Print calcite ionic product     |         |         |  | 4215                               | 052        | 4                |
| 3961                            | 119     | print   |  | 4216                               | 111        | +/-              |
| 3962                            | 047     | /       |  | 4217                               | 064        | Inverse          |
| 3963                            | 109     | RCL MEM |  | 4218                               | 108        | LOG 10           |
| 3964                            | 049     | 1       |  | 4219                               | 041        | )                |
| 3965                            | 055     | 7       |  | 4220                               | 041        | )                |
| 3966                            | 041     | )       |  | 4221                               | 045        | -                |
| Print Omega                     |         |         |  | 4222                               | 040        | (                |
| 4007                            | 119     | print   |  | 4223                               | 109        | RCL MEM          |
| Compute C=[CO2]+[HCO3-]+[CO32-] |         |         |  | 4224                               | 048        | 0                |
| 4048                            | 040     | (       |  | 4225                               | 052        | 4                |
| 4049                            | 109     | RCL MEM |  | 4226                               | 111        | +/-              |
| 4050                            | 049     | 1       |  | 4227                               | 064        | Inverse          |
| 4051                            | 051     | 3       |  | 4228                               | 108        | LOG 10           |
| 4052                            | 043     | +       |  | 4229                               | 041        | )                |
| 4053                            | 109     | RCL MEM |  | 4230                               | 041        | )                |
| 4054                            | 049     | 1       |  | Print alkalinity = Ac+Ab, stow m83 |            |                  |
| 4055                            | 052     | 4       |  | 4271                               | 119        | print            |
| 4056                            | 043     | +       |  | 4272                               | 107        | STO MEM          |
| 4057                            | 109     | RCL MEM |  | 4273                               | 056        | 8                |
| 4058                            | 049     | 1       |  | 4274                               | 051        | 3                |
| 4059                            | 053     | 5       |  | Get new pCO2                       |            |                  |
| 4060                            | 041     | )       |  | 4315                               | 096        | LABEL            |
| Print total carbon C, stow m08  |         |         |  | 4316                               | 104        | Hyperbol         |
| 4101                            | 092     | Root    |  | 4317                               | 040        | (                |

```

4318 109 RCL MEM
4319 057 9
4320 057 9
4321 043 +
4322 109 RCL MEM
4323 055 7
4324 056 8
4325 043 +
4326 109 RCL MEM
4327 049 1
4328 056 8
4329 041 )
Print pCO2 atm stow m18
4370 119 print
4371 107 STO MEM
4372 049 1
4373 056 8
Get new A=[b+2c-U), stoq m01 mm/kg
4414 040 (
4415 109 RCL MEM
4416 048 0
4417 049 1
4418 043 +
4419 109 RCL MEM
4420 056 8
4421 057 9
4422 041 )
4423 119 print
4424 107 STO MEM
4425 048 0
4426 049 1
Get next [CO2] = a using Kaw
4467 040 (
4468 109 RCL MEM
4469 048 0
4470 054 6
4471 042 x
4472 109 RCL MEM
4473 049 1
4474 056 8
4475 041 )
Print next [CO2] = a, stow m14
4516 119 print
4517 107 STO MEM
4518 049 1
4519 051 3
Compute z=K2/(K1a)=c/b^2; b=HCO3-, c=CO3
Solve xb^2+b-y=0 equating c's
x=-b+- (b^2-4ac)^0.5/2a x=b
4640 040 (
4641 040 (
4642 109 RCL MEM
4643 049 1
4644 051 3
4645 114 1/x
4646 042 x
4647 040 (
4648 040 (
4649 109 RCL MEM
4650 048 0

```

```

4651 053 5
4652 111 +/-
4653 064 Inverse
4654 108 LOG 10
4655 041 )
4656 047 /
4657 040 (
4658 109 RCL MEM
4659 048 0
4660 052 4
4661 111 +/-
4662 064 Inverse
4663 108 LOG 10
4664 041 )
4665 041 )
4666 041 )
Print z
4707 119 print
4708 107 STO MEM
4709 057 9
4710 056 8
Solve c=Zb^2=(Ac-b)/2
So 2Zb^2+b-A=0 to solve
4791 040 (
4792 040 (
4793 049 1
4794 043 +
4795 040 (
4796 056 8
4797 042 x
4798 109 RCL MEM
4799 057 9
4800 056 8
4801 042 x
4802 109 RCL MEM
4803 048 0
4804 049 1
4805 041 )
4806 041 )
4807 064 Inverse
4808 113 Square
4809 045 -
4810 049 1
4811 041 )
4812 047 /
4813 040 (
4814 052 4
4815 042 x
4816 109 RCL MEM
4817 057 9
4818 056 8
4819 041 )
4820 041 )
Print and stow b, m14
4861 119 print
4862 107 STO MEM
4863 049 1
4864 052 4
Compute y=C-a=b+c
4905 040 (

```

|                        |     |         |                                   |     |         |
|------------------------|-----|---------|-----------------------------------|-----|---------|
| 4906                   | 109 | RCL MEM | 5200                              | 048 | 0       |
| 4907                   | 048 | 0       | 5201                              | 052 | 4       |
| 4908                   | 056 | 8       | 5202                              | 041 | )       |
| 4909                   | 045 | -       | 5203                              | 119 | print   |
| 4910                   | 109 | RCL MEM | 5204                              | 064 | Inverse |
| 4911                   | 049 | 1       | 5205                              | 108 | LOG 10  |
| 4912                   | 051 | 3       | 5206                              | 119 | print   |
| 4913                   | 041 | )       | 5207                              | 107 | STO MEM |
| Print y=b+c=C-a        |     |         | 5208                              | 049 | 1       |
| 4954                   | 119 | print   | 5209                              | 049 | 1       |
| 4955                   | 107 | STO MEM | Get new a = b/R                   |     |         |
| 4956                   | 057 | 9       | 5250                              | 040 | (       |
| 4957                   | 055 | 7       | 5251                              | 109 | RCL MEM |
| Compute pH             |     |         | 5252                              | 049 | 1       |
| 4998                   | 040 | (       | 5253                              | 052 | 4       |
| 4999                   | 040 | (       | 5254                              | 047 | /       |
| 5000                   | 109 | RCL MEM | 5255                              | 109 | RCL MEM |
| 5001                   | 048 | 0       | 5256                              | 049 | 1       |
| 5002                   | 052 | 4       | 5257                              | 049 | 1       |
| 5003                   | 043 | +       | 5258                              | 041 | )       |
| 5004                   | 040 | (       | 5259                              | 119 | print   |
| 5005                   | 109 | RCL MEM | 5260                              | 107 | STO MEM |
| 5006                   | 049 | 1       | 5261                              | 049 | 1       |
| 5007                   | 052 | 4       | 5262                              | 051 | 3       |
| 5008                   | 047 | /       | Get new pCO2 atm                  |     |         |
| 5009                   | 109 | RCL MEM | 5303                              | 040 | (       |
| 5010                   | 049 | 1       | 5304                              | 109 | RCL MEM |
| 5011                   | 051 | 3       | 5305                              | 049 | 1       |
| 5012                   | 041 | )       | 5306                              | 051 | 3       |
| 5013                   | 108 | LOG 10  | 5307                              | 047 | /       |
| 5014                   | 041 | )       | 5308                              | 109 | RCL MEM |
| 5015                   | 041 | )       | 5309                              | 048 | 0       |
| Print and stow pH, m03 |     |         | 5310                              | 054 | 6       |
| 5056                   | 119 | print   | 5311                              | 041 | )       |
| 5057                   | 107 | STO MEM | Print and stow pCO2 atm, stow m18 |     |         |
| 5058                   | 048 | 0       | 5352                              | 119 | print   |
| 5059                   | 051 | 3       | 5353                              | 107 | STO MEM |
| Compute c=[CO32-]      |     |         | 5354                              | 049 | 1       |
| 5100                   | 040 | (       | 5355                              | 056 | 8       |
| 5101                   | 109 | RCL MEM | Store C and get new C=a+b+c       |     |         |
| 5102                   | 049 | 1       | 5396                              | 040 | (       |
| 5103                   | 052 | 4       | 5397                              | 109 | RCL MEM |
| 5104                   | 113 | Square  | 5398                              | 048 | 0       |
| 5105                   | 042 | x       | 5399                              | 056 | 8       |
| 5106                   | 109 | RCL MEM | 5400                              | 107 | STO MEM |
| 5107                   | 057 | 9       | 5401                              | 054 | 6       |
| 5108                   | 056 | 8       | 5402                              | 056 | 8       |
| 5109                   | 041 | )       | 5403                              | 040 | (       |
| Print c, stow m15      |     |         | 5404                              | 109 | RCL MEM |
| 5150                   | 119 | print   | 5405                              | 049 | 1       |
| 5151                   | 107 | STO MEM | 5406                              | 051 | 3       |
| 5152                   | 049 | 1       | 5407                              | 043 | +       |
| 5153                   | 053 | 5       | 5408                              | 109 | RCL MEM |
| Get new R              |     |         | 5409                              | 049 | 1       |
| 5194                   | 040 | (       | 5410                              | 052 | 4       |
| 5195                   | 109 | RCL MEM | 5411                              | 043 | +       |
| 5196                   | 048 | 0       | 5412                              | 109 | RCL MEM |
| 5197                   | 051 | 3       | 5413                              | 049 | 1       |
| 5198                   | 045 | -       | 5414                              | 053 | 5       |
| 5199                   | 109 | RCL MEM | 5415                              | 041 | )       |

Print and stow C, mOB in M

5456 119 print  
5457 107 STO MEM  
5458 048 0  
5459 056 8  
5460 040 (  
5461 040 (  
5462 109 RCL MEM  
5463 054 6  
5464 056 8  
5465 045 -  
5466 109 RCL MEM  
5467 048 0  
5468 056 8  
5469 041 )

Print dPCO2/period, stow m99

Adjust kg water 33K 10e-44or 66K 2x

5550 119 print  
5551 042 x  
5552 048 0  
5553 046 .  
5554 048 0  
5555 048 0  
5556 048 0  
5557 050 2  
5558 041 )

Print, stow mmoles CO2/per in m99

5599 119 print  
5600 107 STO MEM  
5601 057 9  
5602 057 9  
Compute A=b+2c  
5643 040 (  
5644 109 RCL MEM  
5645 049 1  
5646 052 4  
5647 043 +  
5648 040 (  
5649 050 2  
5650 042 x  
5651 109 RCL MEM  
5652 049 1  
5653 053 5  
5654 041 )  
5655 041 )

Print alkalinity Ac, stow m01

5696 119 print  
5697 107 STO MEM  
5698 048 0  
5699 049 1

Compute and print Ac+Ab

Get B(OH)4-  
5780 040 (  
5781 109 RCL MEM  
5782 056 8  
5783 055 7  
5784 107 STO MEM  
5785 056 8  
5786 054 6  
5787 040 (  
5788 049 1  
5789 043 +  
5790 040 (  
5791 040 (  
5792 109 RCL MEM  
5793 049 1  
5794 057 9  
5795 045 -  
5796 109 RCL MEM  
5797 048 0  
5798 051 3  
5799 041 )  
5800 064 Inverse  
5801 108 LOG 10  
5802 041 )  
5803 041 )  
5804 114 1/x  
5805 042 x  
5806 109 RCL MEM  
5807 056 8  
5808 056 8  
5809 041 )  
Print B(OH)4-, stow 87  
5850 119 print  
5851 107 STO MEM  
5852 056 8  
5853 055 7  
5854 041 )  
5855 040 (  
5856 109 RCL MEM  
5857 056 8  
5858 055 7  
5859 045 -  
5860 109 RCL MEM  
5861 056 8  
5862 054 6  
5863 041 )  
5864 117 SUM MEM  
5865 056 8  
5866 053 5  
5867 109 RCL MEM  
5868 056 8  
5869 053 5  
Print extra acid needed  
5910 119 print  
Get Ab  
5951 040 (  
5952 109 RCL MEM  
5953 048 0  
5954 049 1  
5955 043 +  
5956 109 RCL MEM  
5957 056 8  
5958 055 7  
5959 041 )  
5960 119 print  
Get [Ca2+][CO32-] product  
6001 040 (  
6002 049 1  
6003 046 .

|                                       |     |         |                               |     |          |
|---------------------------------------|-----|---------|-------------------------------|-----|----------|
| 6004                                  | 057 | 9       | 6156                          | 109 | RCL MEM  |
| 6005                                  | 056 | 8       | 6157                          | 054 | 6        |
| 6006                                  | 101 | EE      | 6158                          | 051 | 3        |
| 6007                                  | 051 | 3       | 6159                          | 043 | +        |
| 6008                                  | 111 | +/-     | 6160                          | 109 | RCL MEM  |
| 6009                                  | 042 | x       | 6161                          | 048 | 0        |
| 6010                                  | 109 | RCL MEM | 6162                          | 049 | 1        |
| 6011                                  | 049 | 1       | 6163                          | 041 | )        |
| 6012                                  | 053 | 5       | 6164                          | 107 | STD MEM  |
| 6013                                  | 042 | x       | 6165                          | 048 | 0        |
| 6014                                  | 049 | 1       | 6166                          | 049 | 1        |
| 6015                                  | 101 | EE      | 6167                          | 109 | RCL MEM  |
| 6016                                  | 051 | 3       | 6168                          | 048 | 0        |
| 6017                                  | 111 | +/-     | 6169                          | 049 | 1        |
| 6018                                  | 041 | )       | 6170                          | 119 | print    |
| Print product, stow m96               |     |         | Get new C and print, stow m08 |     |          |
| 6059                                  | 119 | print   | 6211                          | 040 | (        |
| 6060                                  | 107 | STD MEM | 6212                          | 109 | RCL MEM  |
| 6061                                  | 057 | 9       | 6213                          | 048 | 0        |
| 6062                                  | 054 | 6       | 6214                          | 056 | 8        |
| 6063                                  | 040 | (       | 6215                          | 043 | +        |
| 6064                                  | 109 | RCL MEM | 6216                          | 109 | RCL MEM  |
| 6065                                  | 057 | 9       | 6217                          | 054 | 6        |
| 6066                                  | 054 | 6       | 6218                          | 051 | 3        |
| 6067                                  | 047 | /       | 6219                          | 041 | )        |
| 6068                                  | 109 | RCL MEM | 6220                          | 119 | print    |
| 6069                                  | 049 | 1       | 6221                          | 107 | STD MEM  |
| 6070                                  | 055 | 7       | 6222                          | 048 | 0        |
| 6071                                  | 041 | )       | 6223                          | 056 | 8        |
| Print Omega solubility                |     |         | 6224                          | 109 | RCL MEM  |
| 6112                                  | 119 | print   | 6225                          | 048 | 0        |
| Dissolve calcite following acid pulse |     |         | 6226                          | 048 | 0        |
| 6153                                  | 040 | (       | 6227                          | 039 | Dec JPNZ |
| 6154                                  | 050 | 2       | 6228                          | 104 | Hyperbol |
| 6155                                  | 042 | x       | 6229                          | 002 | HALT     |

Oct 10 2020 TITRATE HNO3 or CO2  
 Revised Jun20 2023 KPSZ inputs  
 CO2TIT4:2  
 Models Mauna Loa ti titration  
 Inputs pH, pCO2 K to compute C,A Flg1  
 Computes pCO2 ex A, PH, K Flg2  
 Varies H,K1,K2,Kw,Kc with T & salt S  
 $C=[CO_2+HCO_3^-+CO_3^{2-}]$  total C mmoles/kg  
 $A=[HCO_3^-+2CO_3^{2-}+OH^-+H^++B(OH_4)^-]$   
 Alkalinity label  
 167 moles CO2/m<sup>2</sup> dCO2=1=0.4175 m/m<sup>2</sup>  
 Number increments A or pCO2  
 To limit CO2, use Khx0.75 at 1353  
 Omit M,T for dA; use U for dA

|      |     |         |
|------|-----|---------|
| 0560 | 096 | LABEL   |
| 0561 | 073 | I       |
| 0562 | 107 | STD MEM |
| 0563 | 048 | 0       |
| 0564 | 048 | 0       |
| 0565 | 119 | print   |
| 0566 | 002 | HALT    |

Margin, say 0.000001 for d(pCO2)

|      |     |         |
|------|-----|---------|
| 0607 | 096 | LABEL   |
| 0608 | 077 | M       |
| 0609 | 107 | STD MEM |
| 0610 | 057 | 9       |
| 0611 | 057 | 9       |
| 0612 | 119 | print   |
| 0613 | 002 | HALT    |

Input pCO2 trend 0.0000001 1 ppm

|      |     |         |
|------|-----|---------|
| 0654 | 096 | LABEL   |
| 0655 | 084 | T       |
| 0656 | 107 | STD MEM |
| 0657 | 055 | 7       |
| 0658 | 056 | 8       |
| 0659 | 119 | print   |
| 0660 | 002 | HALT    |

Add strong acid mmoles/kg -0.001

|      |     |         |
|------|-----|---------|
| 0701 | 096 | LABEL   |
| 0702 | 085 | U       |
| 0703 | 107 | STD MEM |
| 0704 | 056 | 8       |
| 0705 | 057 | 9       |
| 0706 | 119 | print   |
| 0707 | 002 | HALT    |

Alkalinity= $[HCO_3^-]+2[CO_3^{2-}]+B(OH+OH^-)$

|      |     |         |
|------|-----|---------|
| 0748 | 096 | LABEL   |
| 0749 | 065 | A       |
| 0750 | 107 | STD MEM |
| 0751 | 048 | 0       |
| 0752 | 049 | 1       |
| 0753 | 119 | print   |
| 0754 | 002 | HALT    |

Label  $C[CO_2+HCO_3^-+CO_3^{2-}]$  mmol/kg

|      |     |         |
|------|-----|---------|
| 0795 | 096 | LABEL   |
| 0796 | 067 | C       |
| 0797 | 107 | STD MEM |
| 0798 | 048 | 0       |
| 0799 | 056 | 8       |
| 0800 | 119 | print   |

|      |     |      |
|------|-----|------|
| 0801 | 002 | HALT |
|------|-----|------|

Input pH value

|      |     |         |
|------|-----|---------|
| 0842 | 096 | LABEL   |
| 0843 | 080 | P       |
| 0844 | 107 | STD MEM |
| 0845 | 048 | 0       |
| 0846 | 051 | 3       |
| 0847 | 119 | print   |
| 0848 | 002 | HALT    |

Label pK1o

|      |     |         |
|------|-----|---------|
| 0889 | 096 | LABEL   |
| 0890 | 078 | N       |
| 0891 | 107 | STD MEM |
| 0892 | 048 | 0       |
| 0893 | 052 | 4       |
| 0894 | 119 | print   |
| 0895 | 002 | HALT    |

Label pK2o

|      |     |         |
|------|-----|---------|
| 0936 | 096 | LABEL   |
| 0937 | 079 | D       |
| 0938 | 107 | STD MEM |
| 0939 | 048 | 0       |
| 0940 | 053 | 5       |
| 0941 | 119 | print   |
| 0942 | 002 | HALT    |

Label Henry's constant Ho

|      |     |         |
|------|-----|---------|
| 0983 | 096 | LABEL   |
| 0984 | 072 | H       |
| 0985 | 107 | STD MEM |
| 0986 | 048 | 0       |
| 0987 | 054 | 6       |
| 0988 | 119 | print   |
| 0989 | 002 | HALT    |

Input temperature K

|      |     |         |
|------|-----|---------|
| 1030 | 096 | LABEL   |
| 1031 | 075 | K       |
| 1032 | 107 | STD MEM |
| 1033 | 053 | 5       |
| 1034 | 055 | 7       |
| 1035 | 119 | print   |
| 1036 | 002 | HALT    |

Input salinity S ‰ g/kg

|      |     |         |
|------|-----|---------|
| 1077 | 096 | LABEL   |
| 1078 | 083 | S       |
| 1079 | 107 | STD MEM |
| 1080 | 048 | 0       |
| 1081 | 057 | 9       |
| 1082 | 119 | print   |
| 1083 | 002 | HALT    |

Input pCO2 atmospheres

|      |     |         |
|------|-----|---------|
| 1124 | 096 | LABEL   |
| 1125 | 090 | Z       |
| 1126 | 107 | STD MEM |
| 1127 | 049 | 1       |
| 1128 | 056 | 8       |
| 1129 | 119 | print   |
| 1130 | 002 | HALT    |

Execute

|      |     |       |
|------|-----|-------|
| 1171 | 096 | LABEL |
| 1172 | 088 | X     |

|                                    |     |         |      |     |         |
|------------------------------------|-----|---------|------|-----|---------|
| 1173                               | 040 | (       | 1311 | 101 | EE      |
| 1174                               | 109 | RCL MEM | 1312 | 050 | 2       |
| 1175                               | 053 | 5       | 1313 | 111 | +/-     |
| 1176                               | 055 | 7       | 1314 | 041 | )       |
| 1177                               | 107 | STD MEM | 1315 | 110 | LOG e   |
| 1178                               | 048 | 0       | 1316 | 042 | x       |
| 1179                               | 055 | 7       | 1317 | 050 | 2       |
| Get Bt =total borates              |     |         | 1318 | 051 | 3       |
| 1220                               | 040 | (       | 1319 | 046 | .       |
| 1221                               | 048 | 0       | 1320 | 051 | 3       |
| 1222                               | 046 | .       | 1321 | 053 | 5       |
| 1223                               | 052 | 4       | 1322 | 056 | 8       |
| 1224                               | 049 | 1       | 1323 | 053 | 5       |
| 1225                               | 054 | 6       | 1324 | 041 | )       |
| 1226                               | 042 | x       | 1325 | 043 | +       |
| 1227                               | 040 | (       | 1326 | 040 | (       |
| 1228                               | 109 | RCL MEM | 1327 | 109 | RCL MEM |
| 1229                               | 048 | 0       | 1328 | 048 | 0       |
| 1230                               | 057 | 9       | 1329 | 057 | 9       |
| 1231                               | 047 | /       | 1330 | 042 | x       |
| 1232                               | 051 | 3       | 1331 | 040 | (       |
| 1233                               | 053 | 5       | 1332 | 048 | 0       |
| 1234                               | 041 | )       | 1333 | 046 | .       |
| 1235                               | 041 | )       | 1334 | 048 | 0       |
| 1236                               | 119 | print   | 1335 | 050 | 2       |
| 1237                               | 107 | STD MEM | 1336 | 051 | 3       |
| 1238                               | 056 | 8       | 1337 | 053 | 5       |
| 1239                               | 056 | 8       | 1338 | 049 | 1       |
| Get pKo Henry's coefficient repCO2 |     |         | 1339 | 055 | 7       |
| 1280                               | 040 | (       | 1340 | 045 | -       |
| 1281                               | 048 | 0       | 1341 | 040 | (       |
| 1282                               | 045 | -       | 1342 | 049 | 1       |
| 1283                               | 054 | 6       | 1343 | 101 | EE      |
| 1284                               | 048 | 0       | 1344 | 050 | 2       |
| 1285                               | 046 | .       | 1345 | 111 | +/-     |
| 1286                               | 050 | 2       | 1346 | 042 | x       |
| 1287                               | 052 | 4       | 1347 | 109 | RCL MEM |
| 1288                               | 048 | 0       | 1348 | 048 | 0       |
| 1289                               | 057 | 9       | 1349 | 055 | 7       |
| 1290                               | 043 | +       | 1350 | 041 | )       |
| 1291                               | 040 | (       | 1351 | 042 | x       |
| 1292                               | 057 | 9       | 1352 | 048 | 0       |
| 1293                               | 051 | 3       | 1353 | 046 | .       |
| 1294                               | 052 | 4       | 1354 | 048 | 0       |
| 1295                               | 053 | 5       | 1355 | 050 | 2       |
| 1296                               | 046 | .       | 1356 | 051 | 3       |
| 1297                               | 049 | 1       | 1357 | 054 | 6       |
| 1298                               | 055 | 7       | 1358 | 053 | 5       |
| 1299                               | 047 | /       | 1359 | 054 | 6       |
| 1300                               | 109 | RCL MEM | 1360 | 043 | +       |
| 1301                               | 048 | 0       | 1361 | 040 | (       |
| 1302                               | 055 | 7       | 1362 | 049 | 1       |
| 1303                               | 041 | )       | 1363 | 101 | EE      |
| 1304                               | 043 | +       | 1364 | 050 | 2       |
| 1305                               | 040 | (       | 1365 | 111 | +/-     |
| 1306                               | 109 | RCL MEM | 1366 | 042 | x       |
| 1307                               | 048 | 0       | 1367 | 109 | RCL MEM |
| 1308                               | 055 | 7       | 1368 | 048 | 0       |
| 1309                               | 042 | x       | 1369 | 055 | 7       |
| 1310                               | 049 | 1       | 1370 | 041 | )       |

|                                       |     |         |            |     |         |
|---------------------------------------|-----|---------|------------|-----|---------|
| 1371                                  | 113 | Square  | 1548       | 057 | 9       |
| 1372                                  | 042 | x       | 1549       | 046 | .       |
| 1373                                  | 048 | 0       | 1550       | 055 | 7       |
| 1374                                  | 046 | .       | 1551       | 057 | 9       |
| 1375                                  | 048 | 0       | 1552       | 052 | 4       |
| 1376                                  | 048 | 0       | 1553       | 052 | 4       |
| 1377                                  | 052 | 4       | 1554       | 041 | )       |
| 1378                                  | 055 | 7       | 1555       | 045 | -       |
| 1379                                  | 048 | 0       | 1556       | 040 | (       |
| 1380                                  | 051 | 3       | 1557       | 048 | 0       |
| 1381                                  | 054 | 6       | 1558       | 046 | .       |
| 1382                                  | 041 | )       | 1559       | 048 | 0       |
| 1383                                  | 041 | )       | 1560       | 049 | 1       |
| 1384                                  | 041 | )       | 1561       | 049 | 1       |
| Print lnK'o function;give rate factor |     |         | 1562       | 056 | 8       |
| 1425                                  | 119 | print   | 1563       | 042 | x       |
| 1426                                  | 064 | Inverse | 1564       | 109 | RCL MEM |
| 1427                                  | 110 | LOG e   | 1565       | 048 | 0       |
| 1428                                  | 042 | x       | 1566       | 057 | 9       |
| 1429                                  | 049 | 1       | 1567       | 041 | )       |
| 1430                                  | 101 | EE      | 1568       | 043 | +       |
| 1431                                  | 051 | 3       | 1569       | 040 | (       |
| 1432                                  | 042 | x       | 1570       | 109 | RCL MEM |
| 1433                                  | 049 | 1       | 1571       | 048 | 0       |
| 1434                                  | 046 | .       | 1572       | 057 | 9       |
| 1435                                  | 048 | 0       | 1573       | 113 | Square  |
| 1436                                  | 048 | 0       | 1574       | 042 | x       |
| Print Ho' mM                          |     |         | 1575       | 048 | 0       |
| 1477                                  | 061 | =       | 1576       | 046 | .       |
| 1478                                  | 119 | print   | 1577       | 048 | 0       |
| 1479                                  | 107 | STD MEM | 1578       | 048 | 0       |
| 1480                                  | 048 | 0       | 1579       | 048 | 0       |
| 1481                                  | 054 | 6       | 1580       | 049 | 1       |
| Get pk1'                              |     |         | 1581       | 049 | 1       |
| 1522                                  | 040 | (       | 1582       | 054 | 6       |
| 1523                                  | 040 | (       | 1583       | 041 | )       |
| 1524                                  | 051 | 3       | 1584       | 041 | )       |
| 1525                                  | 054 | 6       | Print pk1' |     |         |
| 1526                                  | 055 | 7       | 1625       | 119 | print   |
| 1527                                  | 048 | 0       | 1626       | 107 | STD MEM |
| 1528                                  | 046 | .       | 1627       | 048 | 0       |
| 1529                                  | 055 | 7       | 1628       | 052 | 4       |
| 1530                                  | 047 | /       | Get pk2'   |     |         |
| 1531                                  | 109 | RCL MEM | 1669       | 040 | (       |
| 1532                                  | 048 | 0       | 1670       | 040 | (       |
| 1533                                  | 055 | 7       | 1671       | 049 | 1       |
| 1534                                  | 045 | -       | 1672       | 051 | 3       |
| 1535                                  | 054 | 6       | 1673       | 057 | 9       |
| 1536                                  | 050 | 2       | 1674       | 052 | 4       |
| 1537                                  | 046 | .       | 1675       | 046 | .       |
| 1538                                  | 048 | 0       | 1676       | 055 | 7       |
| 1539                                  | 048 | 0       | 1677       | 047 | /       |
| 1540                                  | 056 | 8       | 1678       | 109 | RCL MEM |
| 1541                                  | 043 | +       | 1679       | 048 | 0       |
| 1542                                  | 040 | (       | 1680       | 055 | 7       |
| 1543                                  | 109 | RCL MEM | 1681       | 041 | )       |
| 1544                                  | 048 | 0       | 1682       | 043 | +       |
| 1545                                  | 055 | 7       | 1683       | 052 | 4       |
| 1546                                  | 110 | LOG e   | 1684       | 046 | .       |
| 1547                                  | 042 | x       | 1685       | 055 | 7       |

|                                        |     |         |      |     |         |
|----------------------------------------|-----|---------|------|-----|---------|
| 1884                                   | 045 | -       | 2061 | 047 | /       |
| 1885                                   | 048 | 0       | 2062 | 109 | RCL MEM |
| 1886                                   | 046 | .       | 2063 | 048 | 0       |
| 1887                                   | 048 | 0       | 2064 | 055 | 7       |
| 1888                                   | 049 | 1       | 2065 | 041 | )       |
| 1889                                   | 054 | 6       | 2066 | 045 | -       |
| 1890                                   | 049 | 1       | 2067 | 040 | (       |
| 1891                                   | 053 | 5       | 2068 | 109 | RCL MEM |
| 1892                                   | 042 | x       | 2069 | 048 | 0       |
| 1893                                   | 109 | RCL MEM | 2070 | 055 | 7       |
| 1894                                   | 048 | 0       | 2071 | 108 | LOG 10  |
| 1895                                   | 057 | 9       | 2072 | 042 | x       |
| 1896                                   | 041 | )       | 2073 | 055 | 7       |
| Print ln Kw                            |     |         | 2074 | 049 | 1       |
| 1937                                   | 119 | print   | 2075 | 046 | .       |
| 1938                                   | 107 | STD MEM | 2076 | 053 | 5       |
| 1939                                   | 048 | 0       | 2077 | 057 | 9       |
| 1940                                   | 050 | 2       | 2078 | 053 | 5       |
| 1941                                   | 064 | Inverse | 2079 | 041 | )       |
| 1942                                   | 110 | LOG e   | 2080 | 043 | +       |
| Print Kw                               |     |         | 2081 | 040 | (       |
| 1983                                   | 119 | print   | 2082 | 048 | 0       |
| 1984                                   | 107 | STD MEM | 2083 | 046 | .       |
| 1985                                   | 054 | 6       | 2084 | 055 | 7       |
| 1986                                   | 049 | 1       | 2085 | 055 | 7       |
| Get calcite pKs for solubility product |     |         | 2086 | 055 | 7       |
| 2027                                   | 040 | (       | 2087 | 049 | 1       |
| 2028                                   | 049 | 1       | 2088 | 050 | 2       |
| 2029                                   | 055 | 7       | 2089 | 045 | -       |
| 2030                                   | 049 | 1       | 2090 | 040 | (       |
| 2031                                   | 046 | .       | 2091 | 048 | 0       |
| 2032                                   | 057 | 9       | 2092 | 046 | .       |
| 2033                                   | 048 | 0       | 2093 | 048 | 0       |
| 2034                                   | 054 | 6       | 2094 | 048 | 0       |
| 2035                                   | 053 | 5       | 2095 | 050 | 2       |
| 2036                                   | 043 | +       | 2096 | 056 | 8       |
| 2037                                   | 040 | (       | 2097 | 052 | 4       |
| 2038                                   | 048 | 0       | 2098 | 050 | 2       |
| 2039                                   | 046 | .       | 2099 | 054 | 6       |
| 2040                                   | 048 | 0       | 2100 | 042 | x       |
| 2041                                   | 055 | 7       | 2101 | 109 | RCL MEM |
| 2042                                   | 055 | 7       | 2102 | 048 | 0       |
| 2043                                   | 057 | 9       | 2103 | 055 | 7       |
| 2044                                   | 057 | 9       | 2104 | 041 | )       |
| 2045                                   | 051 | 3       | 2105 | 045 | -       |
| 2046                                   | 042 | x       | 2106 | 040 | (       |
| 2047                                   | 109 | RCL MEM | 2107 | 049 | 1       |
| 2048                                   | 048 | 0       | 2108 | 055 | 7       |
| 2049                                   | 055 | 7       | 2109 | 056 | 8       |
| 2050                                   | 041 | )       | 2110 | 046 | .       |
| 2051                                   | 045 | -       | 2111 | 051 | 3       |
| 2052                                   | 040 | (       | 2112 | 052 | 4       |
| 2053                                   | 050 | 2       | 2113 | 047 | /       |
| 2054                                   | 056 | 8       | 2114 | 109 | RCL MEM |
| 2055                                   | 051 | 3       | 2115 | 048 | 0       |
| 2056                                   | 057 | 9       | 2116 | 055 | 7       |
| 2057                                   | 046 | .       | 2117 | 041 | )       |
| 2058                                   | 051 | 3       | 2118 | 041 | )       |
| 2059                                   | 049 | 1       | 2119 | 042 | x       |
| 2060                                   | 057 | 9       | 2120 | 040 | (       |

|                                     |     |          |      |     |          |
|-------------------------------------|-----|----------|------|-----|----------|
| 2121                                | 109 | RCL MEM  | 2298 | 048 | 0        |
| 2122                                | 048 | 0        | 2299 | 045 | -        |
| 2123                                | 057 | 9        | 2300 | 056 | 8        |
| 2124                                | 064 | Inverse  | 2301 | 057 | 9        |
| 2125                                | 113 | Square   | 2302 | 054 | 6        |
| 2126                                | 041 | )        | 2303 | 054 | 6        |
| 2127                                | 041 | )        | 2304 | 046 | .        |
| 2128                                | 043 | +        | 2305 | 057 | 9        |
| 2129                                | 040 | (        | 2306 | 048 | 0        |
| 2130                                | 048 | 0        | 2307 | 045 | -        |
| 2131                                | 046 | .        | 2308 | 109 | RCL MEM  |
| 2132                                | 048 | 0        | 2309 | 048 | 0        |
| 2133                                | 055 | 7        | 2310 | 057 | 9        |
| 2134                                | 055 | 7        | 2311 | 064 | Inverse  |
| 2135                                | 049 | 1        | 2312 | 113 | Square   |
| 2136                                | 049 | 1        | 2313 | 042 | x        |
| 2137                                | 042 | x        | 2314 | 050 | 2        |
| 2138                                | 109 | RCL MEM  | 2315 | 056 | 8        |
| 2139                                | 048 | 0        | 2316 | 057 | 9        |
| 2140                                | 057 | 9        | 2317 | 048 | 0        |
| 2141                                | 041 | )        | 2318 | 046 | .        |
| 2142                                | 045 | -        | 2319 | 053 | 5        |
| 2143                                | 040 | (        | 2320 | 051 | 3        |
| 2144                                | 048 | 0        | 2321 | 045 | -        |
| 2145                                | 046 | .        | 2322 | 109 | RCL MEM  |
| 2146                                | 048 | 0        | 2323 | 048 | 0        |
| 2147                                | 048 | 0        | 2324 | 057 | 9        |
| 2148                                | 052 | 4        | 2325 | 042 | x        |
| 2149                                | 049 | 1        | 2326 | 055 | 7        |
| 2150                                | 050 | 2        | 2327 | 055 | 7        |
| 2151                                | 052 | 4        | 2328 | 046 | .        |
| 2152                                | 057 | 9        | 2329 | 057 | 9        |
| 2153                                | 042 | x        | 2330 | 052 | 4        |
| 2154                                | 040 | (        | 2331 | 050 | 2        |
| 2155                                | 109 | RCL MEM  | 2332 | 043 | +        |
| 2156                                | 048 | 0        | 2333 | 109 | RCL MEM  |
| 2157                                | 057 | 9        | 2334 | 048 | 0        |
| 2158                                | 091 | Exponent | 2335 | 057 | 9        |
| 2159                                | 049 | 1        | 2336 | 091 | Exponent |
| 2160                                | 046 | .        | 2337 | 049 | 1        |
| 2161                                | 053 | 5        | 2338 | 046 | .        |
| 2162                                | 041 | )        | 2339 | 053 | 5        |
| 2163                                | 041 | )        | 2340 | 042 | x        |
| 2164                                | 041 | )        | 2341 | 049 | 1        |
| Print pKs calcite                   |     |          | 2342 | 046 | .        |
| 2205                                | 119 | print    | 2343 | 055 | 7        |
| 2206                                | 107 | STO MEM  | 2344 | 050 | 2        |
| 2207                                | 049 | 1        | 2345 | 056 | 8        |
| 2208                                | 054 | 6        | 2346 | 045 | -        |
| 2209                                | 111 | +/-      | 2347 | 109 | RCL MEM  |
| 2210                                | 064 | Inverse  | 2348 | 048 | 0        |
| 2211                                | 108 | LOG 10   | 2349 | 057 | 9        |
| Print Ks calcite solubility product |     |          | 2350 | 113 | Square   |
| 2252                                | 119 | print    | 2351 | 042 | x        |
| 2253                                | 107 | STO MEM  | 2352 | 048 | 0        |
| 2254                                | 049 | 1        | 2353 | 046 | .        |
| 2255                                | 055 | 7        | 2354 | 048 | 0        |
| Get lnKb boric acid                 |     |          | 2355 | 057 | 9        |
| 2296                                | 040 | (        | 2356 | 057 | 9        |
| 2297                                | 040 | (        | 2357 | 054 | 6        |

|      |     |         |                                    |     |         |
|------|-----|---------|------------------------------------|-----|---------|
| 2358 | 041 | )       | 2418                               | 048 | 0       |
| 2359 | 047 | /       | 2419                               | 056 | 8       |
| 2360 | 109 | RCL MEM | 2420                               | 053 | 5       |
| 2361 | 048 | 0       | 2421                               | 043 | +       |
| 2362 | 055 | 7       | 2422                               | 109 | RCL MEM |
| 2363 | 043 | +       | 2423                               | 048 | 0       |
| 2364 | 049 | 1       | 2424                               | 057 | 9       |
| 2365 | 052 | 4       | 2425                               | 042 | x       |
| 2366 | 056 | 8       | 2426                               | 048 | 0       |
| 2367 | 046 | .       | 2427                               | 046 | .       |
| 2368 | 048 | 0       | 2428                               | 050 | 2       |
| 2369 | 050 | 2       | 2429                               | 052 | 4       |
| 2370 | 052 | 4       | 2430                               | 055 | 7       |
| 2371 | 056 | 8       | 2431                               | 052 | 4       |
| 2372 | 043 | +       | 2432                               | 041 | )       |
| 2373 | 109 | RCL MEM | 2433                               | 042 | x       |
| 2374 | 048 | 0       | 2434                               | 040 | (       |
| 2375 | 057 | 9       | 2435                               | 109 | RCL MEM |
| 2376 | 064 | Inverse | 2436                               | 048 | 0       |
| 2377 | 113 | Square  | 2437                               | 055 | 7       |
| 2378 | 042 | x       | 2438                               | 110 | LOG e   |
| 2379 | 049 | 1       | 2439                               | 041 | )       |
| 2380 | 051 | 3       | 2440                               | 043 | +       |
| 2381 | 055 | 7       | 2441                               | 109 | RCL MEM |
| 2382 | 046 | .       | 2442                               | 048 | 0       |
| 2383 | 049 | 1       | 2443                               | 055 | 7       |
| 2384 | 057 | 9       | 2444                               | 042 | x       |
| 2385 | 052 | 4       | 2445                               | 109 | RCL MEM |
| 2386 | 050 | 2       | 2446                               | 048 | 0       |
| 2387 | 043 | +       | 2447                               | 057 | 9       |
| 2388 | 109 | RCL MEM | 2448                               | 064 | Inverse |
| 2389 | 048 | 0       | 2449                               | 113 | Square  |
| 2390 | 057 | 9       | 2450                               | 042 | x       |
| 2391 | 042 | x       | 2451                               | 048 | 0       |
| 2392 | 049 | 1       | 2452                               | 046 | .       |
| 2393 | 046 | .       | 2453                               | 048 | 0       |
| 2394 | 054 | 6       | 2454                               | 053 | 5       |
| 2395 | 050 | 2       | 2455                               | 051 | 3       |
| 2396 | 049 | 1       | 2456                               | 049 | 1       |
| 2397 | 052 | 4       | 2457                               | 048 | 0       |
| 2398 | 050 | 2       | 2458                               | 053 | 5       |
| 2399 | 045 | -       | 2459                               | 041 | )       |
| 2400 | 040 | (       | Print lnkb                         |     |         |
| 2401 | 050 | 2       | 2500                               | 119 | print   |
| 2402 | 052 | 4       | 2501                               | 047 | /       |
| 2403 | 046 | .       | 2502                               | 049 | 1       |
| 2404 | 052 | 4       | 2503                               | 048 | 0       |
| 2405 | 051 | 3       | 2504                               | 110 | LOG e   |
| 2406 | 052 | 4       | 2505                               | 041 | )       |
| 2407 | 052 | 4       | 2506                               | 111 | +/-     |
| 2408 | 043 | +       | Print pKb                          |     |         |
| 2409 | 109 | RCL MEM | 2547                               | 119 | print   |
| 2410 | 048 | 0       | 2548                               | 107 | STO MEM |
| 2411 | 057 | 9       | 2549                               | 049 | 1       |
| 2412 | 064 | Inverse | 2550                               | 057 | 9       |
| 2413 | 113 | Square  | Get R= [HCO3-]/[CO2] lnlg (pH-pK1) |     |         |
| 2414 | 042 | x       | 2591                               | 040 | (       |
| 2415 | 050 | 2       | 2592                               | 109 | RCL MEM |
| 2416 | 053 | 5       | 2593                               | 048 | 0       |
| 2417 | 046 | .       | 2594                               | 051 | 3       |

|                      |     |         |                           |
|----------------------|-----|---------|---------------------------|
| 2595                 | 045 | -       | Get [C02]=a = m18xm06     |
| 2596                 | 109 | RCL MEM | 2851 040 (                |
| 2597                 | 048 | 0       | 2852 109 RCL MEM          |
| 2598                 | 052 | 4       | 2853 049 1                |
| 2599                 | 041 | )       | 2854 056 8                |
| 2600                 | 119 | print   | 2855 042 x                |
| 2601                 | 064 | Inverse | 2856 109 RCL MEM          |
| 2602                 | 108 | LOG 10  | 2857 048 0                |
| 2603                 | 119 | print   | 2858 054 6                |
| 2604                 | 107 | STD MEM | 2859 041 )                |
| 2605                 | 049 | 1       | Print a                   |
| 2606                 | 049 | 1       | 2900 119 print            |
| Get [C032-]/HC03-]=S |     |         | 2901 107 STD MEM          |
| 2647                 | 040 | (       | 2902 052 4                |
| 2648                 | 109 | RCL MEM | 2903 048 0                |
| 2649                 | 048 | 0       | Get [HC03-]=b=Rxa=m11xm40 |
| 2650                 | 051 | 3       | 2944 040 (                |
| 2651                 | 045 | -       | 2945 109 RCL MEM          |
| 2652                 | 109 | RCL MEM | 2946 049 1                |
| 2653                 | 048 | 0       | 2947 049 1                |
| 2654                 | 053 | 5       | 2948 042 x                |
| 2655                 | 041 | )       | 2949 109 RCL MEM          |
| 2656                 | 119 | print   | 2950 052 4                |
| 2657                 | 064 | Inverse | 2951 048 0                |
| 2658                 | 108 | LOG 10  | 2952 041 )                |
| Print S              |     |         | Print b stow m41          |
| 2699                 | 119 | print   | 2993 119 print            |
| 2700                 | 107 | STD MEM | 2994 107 STD MEM          |
| 2701                 | 049 | 1       | 2995 052 4                |
| 2702                 | 050 | 2       | 2996 049 1                |
| Get B(OH)4-          |     |         | Get c=bxS=m41xm12         |
| 2743                 | 040 | (       | 3037 040 (                |
| 2744                 | 040 | (       | 3038 109 RCL MEM          |
| 2745                 | 049 | 1       | 3039 052 4                |
| 2746                 | 043 | +       | 3040 049 1                |
| 2747                 | 040 | (       | 3041 042 x                |
| 2748                 | 040 | (       | 3042 109 RCL MEM          |
| 2749                 | 109 | RCL MEM | 3043 049 1                |
| 2750                 | 049 | 1       | 3044 050 2                |
| 2751                 | 057 | 9       | 3045 041 )                |
| 2752                 | 045 | -       | Print c stow m42          |
| 2753                 | 109 | RCL MEM | 3086 119 print            |
| 2754                 | 048 | 0       | 3087 107 STD MEM          |
| 2755                 | 051 | 3       | 3088 052 4                |
| 2756                 | 041 | )       | 3089 050 2                |
| 2757                 | 064 | Inverse | Get a+b+c=C               |
| 2758                 | 108 | LOG 10  | 3130 040 (                |
| 2759                 | 041 | )       | 3131 109 RCL MEM          |
| 2760                 | 041 | )       | 3132 052 4                |
| 2761                 | 114 | 1/x     | 3133 048 0                |
| 2762                 | 042 | x       | 3134 043 +                |
| 2763                 | 109 | RCL MEM | 3135 109 RCL MEM          |
| 2764                 | 056 | 8       | 3136 052 4                |
| 2765                 | 056 | 8       | 3137 049 1                |
| 2766                 | 041 | )       | 3138 043 +                |
| Print B(OH)4-        |     |         | 3139 109 RCL MEM          |
| 2807                 | 119 | print   | 3140 052 4                |
| 2808                 | 107 | STD MEM | 3141 050 2                |
| 2809                 | 056 | 8       | 3142 041 )                |
| 2810                 | 055 | 7       | Print C stow m08          |

```

3142 041 )
Print C stow m08
3183 119 print
3184 107 STO MEM
3185 048 0
3186 056 8
Get A=b+2c
3227 040 (
3228 109 RCL MEM
3229 052 4
3230 049 1
3231 043 +
3232 109 RCL MEM
3233 052 4
3234 050 2
3235 043 +
3236 109 RCL MEM
3237 052 4
3238 050 2
3239 041 )

```

```

Print A stow m01
3280 119 print
3281 107 STO MEM
3282 048 0
3283 049 1
Get b/c
3324 040 (
3325 109 RCL MEM
3326 052 4
3327 049 1
3328 047 /
3329 109 RCL MEM
3330 052 4
3331 050 2
3332 041 )
3333 119 print
3334 107 STO MEM
3335 052 4
3336 053 5
3337 002 HALT

```

Table S6

Chemical Oceanography and Marine Carbon Cycle

Steven Emerson

- **Publisher:** Cambridge University Press
- **Online publication date:** September 2012
- **Print publication year:** 2008
- **Online ISBN:** 9780511793202
- **DOI:** <https://doi.org/10.1017/CBO9780511793202>

Carbonate Chemistry

Emerson S. and Hedges pp. 101-133

Appendix 4.2 equations were employed in CO2TIT1, CO2TIT3, CO2Tit4 to establish various constants for different temperature and salt concentrations.

$$K_{p,3} = \frac{[\text{PO}_4^{3-}] \times [\text{H}^+]}{[\text{HPO}_4^{2-}]} \quad (4A1.6)$$

$$K_w = [\text{OH}^-] [\text{H}^+] \quad (4A1.7)$$

#### 4A1.2

The following Matlab function program finds the root of the cubic equation for  $[\text{H}^+]$  in terms of  $A_{\text{C\&B}}$  and DIC resulting from the combination of the equations in 4A1.1 (a) and (b) above (Zeebe and Wolf-Gladrow, 2000). Input values are temperature, salinity, depth,  $A_{\text{C\&B}}$  and DIC and the outputs are  $f_{\text{CO}_2}$ , pH,  $[\text{CO}_2]$ ,  $[\text{HCO}_3^-]$  and  $[\text{CO}_3^{2-}]$ . Units and equilibrium constants used are indicated in the comment statements, which are preceded by a % sign.

```
function [fco2, pH, co2, hco3, co3] = co3eq(temp, s, z, alk, dic)
% Function to calculate fCO2, HCO3, and CO3 from ALK and DIC as a
% f(temp,sal,Z)
% temp = temp(deg C),
% sal = salinity(ppt), depth = z(m), alk = ALK(microeq/kg),
% dic = DIC(micromol kg-1)
% HCO3, CO3, and CO2 are returned in mol kg-1, fCO2 in atm
% This program uses the equations in Zeebe and Wolf-Gladrow (2000) and
% Matlab's root finding routine
% checked for fCO2 against Luecker et al. (2000), May 2002;
% Depth dependence has not been checked
t = temp + 273.15;
Pr = z/10;
alk = alk * .000001;
dic = dic * .000001;
R = 83.131;
% Calculate total borate (tbor) from chlorinity
tbor = .000416 * s / 35.0;
% Calculate Henry's Law coeff, KH (Weiss, 1974)
U1 = -60.2409 + 93.4517 * (100/t) + 23.3585 * log(t/100);
U2 = s * (.023517 - .023656 * (t/100) + .0047036 * (t/100) ^ 2);
KH = exp(U1 + U2);
% Calculate KB from temp & sal (Dickson, 1990)
KB = exp((-8966.9 - 2890.53 * s ^ 0.5 - 77.942 * s + 1.728 * s ^ 1.5
- 0.0996 * s ^ 2)/t ... + 148.0248 + 137.1942 * s ^ 0.5 + 1.62142 * s
- (24.4344 + 25.085 * s ^ 0.5 + ... 0.2474 * s) * log(t) + 0.053105 * s ^ 0.5 * t);
% Calculate K1 and K2 (Luecker et al., 2000)
K1 = 10^(-(3633.86/t - 61.2172 + 9.67770 *
log(t) - 0.011555 * s + 0.0001152 * s ^ 2));
K2 = 10^(-(471.78/t + 25.9290 - 3.16967 *
log(t) - 0.01781 * s + 0.0001122 * s ^ 2));
% Pressure variation of K1, K2, and KB (Millero, 1995)
dvB = -29.48 + 0.1622 * temp - .002608 * (temp)^2;
dv1 = -25.50 + 0.1271 * temp;
dv2 = -15.82 - 0.0219 * temp;
dkB = -.00284;
dk1 = -.00308 + 0.0000877 * temp;
```

```

dk2 = +.00113 -.0001475 * temp;
KB = (exp(- (dvB/(R*t))*Pr + (0.5 * dkB/(R*t))*Pr^2)) * KB;
K1 = (exp(- (dv1/(R*t))*Pr + (0.5 * dk1/(R*t))*Pr^2)) * K1;
K2 = (exp(- (dv2/(R*t))*Pr + (0.5 * dk2/(R*t))*Pr^2)) * K2;
% temperature dependence of Kw (DoE, 1994)
KW1 = 148.96502-13847.26/t-23.65218*log(t);
KW2 = (118.67/t-5.977 + 1.0495*log(t))*s ^ .5-0.01615*s;
KW = exp(KW1 + KW2);
% solve for H ion (Zeebe and Wolf-Gladrow, 2000)
a1 = 1;
a2 = (alk + KB + K1);
a3 = (alk*KB - KB*tbor - KW + alk*K1 + K1*KB + K1*K2 - dic*K1);
a4 = (-KW*KB + alk*KB*K1 - KB*tbor*K1 - KW*K1 + alk*K1*K2
      + KB*K1*K2 - dic*KB*K1 - 2*dic*K1*K2);
a5 = (-KW*KB*K1 + alk*KB*K1*K2 - KW*K1*K2 - KB*tbor*K1*K2 - 2*dic*KB
      K1*K2);
a6 = -KB*KW*K1*K2;
p = [a1 a2 a3 a4 a5 a6];
r = roots(p);
h = max(real(r));
% calculate the HCO3, CO3 and CO2aq using DIC, Alk and H +
format short g;
hco3 = dic/(1 + h/K1 + K2/h);
co3 = dic/(1 + h/K2 + h*h/(K1*K2));
co2 = dic/(1 + K1/h + K1*K2/(h*h));
fco2 = co2 / KH;
pH = -log10(h);
% calculate B(OH)4- and OH
BOH4 = KB*tbor/(h + KB); OH = KW/h;
% recalculate DIC and Alk to check calculations
Ct = (hco3 + co3 + co2)*1e6;
At = (hco3 + 2*co3 + BOH4 + OH-h)*1e6;

```

## Appendix 4.2 Equations for calculating the equilibrium constants of the carbonate and borate buffer system

Constants are based on the "total" pH scale,  $\text{pH}_T$  (Dickson, 1984, 1993). Values are first presented at 1 atm pressure and then equations are given for calculating the pressure effect on  $K$ .  $T$  is temperature in either degrees Kelvin ( $T$ ), or degrees centigrade ( $T_C$ ). Salinities are on the practical salinity scale. Equilibrium constants for the equilibria other than  $K_H$ ,  $K'_1$ ,  $K'_2$ ,  $K'_B$ , and  $K'_W$  given in Appendix 4A1.1(c) can be found in DoE (1994) and in Zeebe and Wolf-Gladrow (2000).

### 4A2.1. Values at 1 atmosphere

(a) The Henry's Law constant for  $\text{CO}_2$  in seawater ( $\text{mol kg}^{-1}\text{atm}^{-1}$ ), Eq. (4.14)

Source: From Weiss (1974) as reported in DoE (1994).

$$\begin{aligned} \ln K_H &= \frac{9345.17}{T} - 60.2409 + 23.3585 \ln \left( \frac{T}{100} \right) \\ &+ S \left[ 0.023517 - 0.00023656T + 0.0047036 \left( \frac{T}{100} \right)^2 \right] \\ &= -3.5617 \quad (T_C = 25 \text{ (} T = 298.15 \text{), } S = 35). \end{aligned} \quad (4A2.1)$$

**(b) The first (Eq. (4.11)) and second (Eq. (4.9)) dissociation constants for carbonic acid in seawater (mol kg<sup>-1</sup>)**

Mehrbach's constants are given on the total pH scale (Luecker *et al.*, 2000).

$$\begin{aligned} \text{p}K_1' &= \frac{3633.86}{T} - 61.2172 + 9.6777 \ln(T) - 0.011555S + 0.0001152S^2 \\ &= 5.847 \quad (T_C = 25, S = 35) \end{aligned} \quad (4A2.2)$$

$$\begin{aligned} \text{p}K_2' &= \frac{471.78}{T} + 25.9290 - 3.16967 \ln(T) - 0.01781S + 0.0001122S^2 \\ &= 8.966 \quad (T_C = 25, S = 35). \end{aligned} \quad (4A2.3)$$

**(c) Boric acid in seawater, mol kg<sup>-1</sup> (Eqs. (4.19 and 4.20))**

Based on Dickson (1990) as reported in DoE (1994).

$$B_T = [\text{B(OH)}_3] + [\text{B(OH)}_4^-] = 4.16 \times 10^{-4} \quad (S = 35) \quad (4A2.4)$$

$$\begin{aligned} \ln K_B &= \frac{-8966.90 - 2890.53S^{1/2} - 77.942S + 1.728S^{3/2} - 0.0996S^2}{T} \\ &+ 148.0248 + 137.1942S^{1/2} + 1.62142S \\ &- \left( 24.4344 + 25.085S^{1/2} + 0.2474S \right) \ln(T) + 0.053105S^{1/2}T \\ &= -19.7964 \quad (T_C = 25, S = 35). \end{aligned} \quad (4A2.5)$$

**(d) The dissociation constant of water, mol<sup>2</sup> kg<sup>-1</sup>**

From Dickson and Riley (1979) as reported in DoE (1994).

$$\begin{aligned} \ln K_W &= 148.96502 - \frac{13847.26}{T} - 23.6521 \ln(T) \\ &+ \left( \frac{118.67}{T} - 5.977 + 1.0495 \ln(T) \right) S^{1/2} - 0.01615S \\ &= -30.434 \quad (T_C = 25, S = 35). \end{aligned} \quad (4A2.6)$$

**4A2.2 The pressure dependence (from Millero, 1995)**

The effect of pressure can be calculated from the molal volume,  $\Delta V$ , and compressibility,  $\Delta \kappa$ , changes for any given reaction

$$\ln \frac{K_P}{K_0} = - \left( \frac{\Delta V}{RT} \right) P + \left( \frac{0.5 \Delta \kappa}{RT} \right) P^2, \quad (4A2.7)$$

Table 4A2.1. Parameters for calculating the effect of pressure change on carbonate buffer system reactions and values of equilibrium constants at  $P=0$  and 300 bar

| Constant | $a_0$ | $a_1$   | $a_2 \times 10^3$ | $b_0 \times 10^3$ | $b_1 \times 10^3$ | $P=0$  | $P=300$ | $K^{300}/K^0$ |
|----------|-------|---------|-------------------|-------------------|-------------------|--------|---------|---------------|
| $pK_1'$  | 25.50 | -0.1271 | 0.0               | 3.08              | -0.0877           | 5.847  | 5.726   | 1.32          |
| $pK_2'$  | 15.82 | 0.0219  | 0.0               | -1.13             | 0.1475            | 8.966  | 8.883   | 1.21          |
| $pK_B'$  | 29.48 | -0.1622 | 2.608             | 2.84              | 0.0               | 8.598  | 8.455   | 1.39          |
| $pK_W'$  | 25.60 | 0.2324  | -3.6246           | 5.13              | 0.0794            | 13.217 | 13.106  | 1.43          |

where  $K_p$  and  $K_0$  are equilibrium constants for the reaction of interest at pressure  $P$  and at 0 bars (1 atm), respectively.  $P$  is pressure in bars,  $R = 83.131 \text{ (cm}^3 \text{ bar mol}^{-1} \text{ K}^{-1}\text{)}$  and  $T$  is in degrees Kelvin. The molar volume ( $\text{cm}^3 \text{ mol}$ ) and compressibility can be fit to equations of the form ( $S=35$ )

$$-\Delta V = a_0 + a_1 T_C + a_2 T_C^2; \quad (4A2.8)$$

$$-\Delta \kappa = b_0 + b_1 T_C, \quad (4A2.9)$$

where  $T_C$  is now temperature in degrees C. Values for the coefficients  $a$  and  $b$  are presented in Table 4A2.1 along with calculated differences in  $pK'$  and  $K'$  at two different pressures ( $T_C = 25^\circ \text{C}$ ,  $S = 35$ ).

## References

- Broecker, W. S. and T.-H. Peng (1982) *Tracers in the Sea*. Palisades, NY: EIDIGIO Press.
- Dickson, A. G. (1981) An exact definition of total alkalinity and a procedure for estimation of alkalinity and total inorganic carbon from titration data. *Deep-Sea Res.* **28A**(6), 609-23.
- Dickson, A. G. (1984) pH scales and proton-transfer reactions in saline media such as sea water. *Geochim. Cosmochim. Acta* **48**, 2299-308.
- Dickson, A. G. (1990) Thermodynamics of the dissociation of boric acid in synthetic seawater from 273.15 to 298.15 K. *Deep-Sea Res.* **37**, 755-66.
- Dickson, A. G. (1993) pH buffers for sea water media based on the total hydrogen ion concentration scale. *Deep-Sea Res.* **40**, 107-18.
- Dickson, A. G. and F. J. Millero (1987) A comparison of the equilibrium constants for the dissociation of carbonic acid in seawater media. *Deep-Sea Res.* **34**, 1733-43.
- Dickson, A. G. and J. P. Riley (1979) The estimation of acid dissociation constants in seawater media from potentiometric titrations with strong base I. The ionic product of water ( $K_w$ ). *Mar. Chem.* **7**, 89-99.
- DoE (1994) *Handbook of Methods for the Analysis of the Various Parameters of the Carbon Dioxide System in Sea Water*, version 2 (ed. A. G. Dickson and C. Goyet). ORNL/CDIAC-74.
- Emerson, S. (1995) Enhanced transport of carbon dioxide during gas exchange. In *Air-Water Gas Transfer. Selected papers from the Third International Symposium on Air-Water Gas Transfer July 24-27, 1995 Heidelberg University* (ed. B. Jahne and E. C. Monahan), pp. 23-36. Hanau: AEON Verlag.
